# Supplementary material for: Multivariate genome-wide analyses of insulin resistance phenotypes unravel novel loci and therapeutic targets for cardiometabolic health and longevity
Source: Research Square preprint supplement (doi:10.21203/rs.3.rs-6768173/v1), 2025-06-09
Supplement: Supplementary file 1 [file 62a032001a34c6139bddb67e.xlsx]

## Sheet: Table of Contents
Multivariate genome-wide analyses of insulin resistance phenotypes unravel novel loci and therapeutic targets for cardiometabolic health and longevity
Table of contents for the Supplementary Tables
Supplementary Table 1. LDSC results between IR phenotypes
Supplementary Table 2. Independent genome-wide significant signals associated with mvIR_NGWAMA
Supplementary Table 3. Independent genome-wide significant signals associated with mvIR_MTAG
Supplementary Table 4. Independent genome-wide significant signals associated with mvIR_CPASSOC
Supplementary Table 5. 217 independent genome-wide significant signals associated with mvIR
Supplementary Table 6. UVMR estimates for the causal associations of IR with cardiometabolic health and longevity outcomes
Supplementary Table 7. UVMR estimates for the causal associations between IR and seven common cancers
Supplementary Table 8. Directional pleiotropy test and heterogeneity test for the causal associations of IR with cardiometabolic health and longevity outcomes
Supplementary Table 9. MVMR estimates for the causal associations of mvIR with cardiometabolic health and longevity outcomes with adjustment for each adiposity or sarcopenia-related trait
Supplementary Table 10. Directional pleiotropy test and heterogeneity test for the causal associations of mvIR with cardiometabolic health and longevity outcomes with adjustment for each adiposity or sarcopenia-related trait
Supplementary Table 11. MR estimates for the causal associations between the 21 druggable genes and IR phenotypes
Supplementary Table 12. Directional pleiotropy test and heterogeneity test for the causal associations between the 21 druggable genes and IR phenotypes
Supplementary Table 13. Results of colocalization between the 21 druggable genes and IR phenotypes
Supplementary Table 14. cis-pQTL related to ERBB3, FGFR1, LPL and PDGFC
Supplementary Table 15. cis-pQTL related to ERBB3, FGFR1, LPL and PDGFC and the results of mendelian randomization analysis
Supplementary Table 16. MR estimates for the causal associations of liver function, muscle health, and adiposity traits with IR phenotypes
Supplementary Table 17. MR estimates for the causal associations of druggable genes with liver function, muscle health, and adiposity traits
Supplementary Table 18. Mediation effects of the druggable genes on IR via liver, muscle, or adiposity traits
Supplementary Table 19. MR estimates for the causal associations of the 21 druggable genes with cardiometabolic health and longevity outcomes
Supplementary Table 20. Potential drug targets offer possible drug repurposing opportunities as clinical drug candidates for IR

## Sheet: ST1
Supplementary Table 1. LDSC results between IR phenotypes
Phenotype 1	Phenotype 2	rg	rg_se	rg_p
HOMA-IR	ISI	-0.618278	0.105866	5.41409e-09
HOMA-IR	Fins	1.21686	0.10494	3.73344e-31
HOMA-IR	TG:HDL-C	0.554934	0.0708943	4.97179e-15
HOMA-IR	mvIR_NGWAMA	0.77	0.08	1.06272e-24
HOMA-IR	mvIR_MTAG	0.81	0.08	1.0086e-25
ISI	Fins	-0.829765	0.0749816	1.80654e-28
ISI	TG:HDL	-0.48	0.04	1.31e-30
ISI	mvIR_NGWAMA	-0.63	0.05	2.63488e-37
ISI	mvIR_MTAG	-0.63	0.05	1.03991e-31
Fins	TG:HDL-C	0.381056	0.0520561	2.54e-13
Fins	mvIR_NGWAMA	0.62	0.06	1.03042e-24
Fins	mvIR_MTAG	0.67	0.07	6.95844e-24
TG:HDL-C	mvIR_NGWAMA	0.96	0.06	3.69619e-61
TG:HDL-C	mvIR_MTAG	0.91	0.06	2.30783e-53
mvIR_NGWAMA	mvIR_MTAG	0.97	0.07	2.47266e-39
Abbreviations: Fins, fasting insulin; HOMA-IR, homeostasis model assessment of insulin resistance; IR, insulin resistance; ISI, insulin sensitivity index; LDSC, linkage disequilibrium score; MTAG, multi-trait analysis of genome-wide association study; NGWAMA, N-weighted genome-wide association meta-analysis; TG:HDL-C, ratio of triglycerides to high-density lipoprotein cholesterol.

## Sheet: ST2
Supplementary Table 2. Independent genome-wide significant signals associated with mvIR_NGWAMA
GenomicLocus	uniqID	rsID	Chromosome	Position	P value	start	end	N SNPs	N GWAS SNPs	N Ind Sig SNPs	N Lead SNPs	Lead SNPs
1	1:2226333:A:T	rs903918	1	2226333	2.06114e-08	2222560	2240006	16	14	1	1	rs903918
2	1:2983318:C:T	rs2788091	1	2983318	6.98368e-09	2936386	2983318	112	89	1	1	rs2788091
3	1:9334993:A:G	rs57533288	1	9334993	3.28267e-09	9325676	9336748	15	12	1	1	rs57533288
4	1:11233559:C:T	rs4845852	1	11233559	9.45399e-10	11099788	11365015	212	156	1	1	rs4845852
5	1:15829457:C:G	rs4661637	1	15829457	8.44746e-12	15803338	16046109	162	110	3	1	rs4661637
6	1:23965829:C:T	rs10917404	1	23965829	9.89942e-09	23710475	23969336	19	11	2	2	rs2298632;rs10917404
7	1:27021913:C:G	rs114165349	1	27021913	6.54195e-46	26805169	27397604	279	215	9	3	rs11113;rs114165349;rs12758606
8	1:29554506:C:T	rs12138928	1	29554506	3.76223e-08	29233483	29569660	64	49	1	1	rs12138928
9	1:40035928:G:T	rs3768321	1	40035928	6.3309e-49	39310639	40441964	672	520	33	6	rs189965467;rs3954096;rs111452793;rs3768321;rs72665235;rs61781290
10	1:42255494:C:T	rs1877454	1	42255494	4.8436e-08	42255494	42270779	14	14	1	1	rs1877454
11	1:50852249:A:G	rs2784135	1	50852249	4.64226e-16	50828316	52061445	752	602	6	2	rs2784135;rs138422027
12	1:61670759:A:G	rs74328314	1	61670759	7.75626e-09	61670582	61721857	56	46	1	1	rs74328314
13	1:62903363:C:G	rs9436222	1	62903363	1.03195e-87	62834094	63399692	717	530	24	6	rs72929768;rs9436222;rs76634846;rs72669514;rs4630152;rs12725370
14	1:71414863:A:G	rs650194	1	71414863	3.63108e-08	71409530	71482873	18	15	1	1	rs650194
15	1:72753825:A:T	rs2613497	1	72753825	6.05287e-10	72628347	72949290	152	80	1	1	rs2613497
16	1:91193049:A:T	rs10922907	1	91193049	4.35389e-08	91189731	91212216	19	17	1	1	rs10922907
17	1:93839608:G:T	rs35628716	1	93839608	8.07125e-18	93539383	94009830	456	343	8	1	rs35628716
18	1:98478981:C:T	rs1938566	1	98478981	4.38719e-09	98327133	98559093	169	143	1	1	rs1938566
19	1:109821307:G:T	rs583104	1	109821307	1.50501e-16	109790286	109822166	29	25	2	1	rs583104
20	1:110497808:A:G	rs61785481	1	110497808	7.9153e-15	110455305	110504663	37	34	5	2	rs333948;rs61785481
21	1:149777979:C:T	rs146802096	1	149777979	3.89841e-17	149729337	151233488	1284	927	15	5	rs146802096;rs146356417;rs6681742;rs12073630;rs12090604
22	1:154254317:A:G	rs12135346	1	154254317	1.26543e-14	153992734	154260361	151	108	2	1	rs12135346
23	1:172360164:A:G	rs2227198	1	172360164	5.79336e-19	172302258	172454826	159	131	8	1	rs2227198
24	1:178504590:A:G	rs58877113	1	178504590	3.61748e-11	178473105	178626192	195	160	2	1	rs58877113
25	1:182164250:C:T	rs1779807	1	182164250	4.24058e-09	182048703	182171957	46	35	2	1	rs1779807
26	1:183268483:C:T	rs147885904	1	183268483	1.45836e-09	183119724	183402200	204	167	4	1	rs147885904
27	1:201800868:A:G	rs2820295	1	201800868	1.38065e-08	201787940	201887457	56	44	1	1	rs2820295
28	1:203518382:C:T	rs2821231	1	203518382	3.58602e-15	203498514	203540591	32	25	2	1	rs2821231
29	1:205041542:C:T	rs3903399	1	205041542	1.94832e-13	205012106	205265370	207	167	7	2	rs3903399;rs9659978
30	1:219668252:A:C	rs1538742	1	219668252	3.95792e-42	219266883	220005472	412	335	30	5	rs2605090;rs1538742;rs76926608;rs11118352;rs12123244
31	1:220970028:A:G	rs2642438	1	220970028	1.21935e-16	220693476	221357227	124	101	15	4	rs115316355;rs2642438;rs11118610;rs61819230
32	1:228076739:C:T	rs878811	1	228076739	4.42165e-14	228056868	228101808	32	26	3	1	rs878811
33	1:230301811:G:T	rs11122450	1	230301811	1.87879e-168	230016672	230870604	413	342	47	14	rs4275465;rs10864699;rs115047514;rs35498929;rs4846911;rs143742530;rs11122450;rs6541300;rs12127595;rs6541303;rs2273967;rs3213495;rs7546580;rs75571736
34	2:264621:A:C	rs114976176	2	264621	2.66144e-08	211317	305203	59	44	1	1	rs114976176
35	2:3642361:C:T	rs3820897	2	3642361	3.78881e-21	3632442	3648186	16	7	1	1	rs3820897
36	2:6160927:C:T	rs113532697	2	6160927	1.1709e-08	6146154	6161212	15	12	1	1	rs113532697
37	2:21221035:A:C	rs4665710	2	21221035	2.51882e-184	20878719	21477029	678	532	66	20	rs548782;rs12624282;rs4971534;rs62123892;rs13022310;rs10187878;rs76233241;rs35635595;rs36177368;rs62120852;rs4665710;rs141644795;rs1799812;rs192275397;rs12720766;rs12720788;rs71435595;rs190223280;rs72782181;rs34468875
38	2:25512438:G:T	rs12999687	2	25512438	1.38943e-11	25510276	25592918	44	34	5	1	rs12999687
39	2:26098259:A:C	rs34820121	2	26098259	8.55981e-17	25901513	26148401	260	180	5	1	rs34820121
40	2:27598097:C:T	rs4665972	2	27598097	3.3199e-184	26911509	28646847	1544	1207	116	31	rs35021474;rs4665347;rs12617848;rs6714780;rs190229273;rs72808908;rs72808941;rs187356988;rs35784342;rs934986;rs77585907;rs1275519;rs114163473;rs186711987;rs114561490;rs111925401;rs41288829;rs4665972;rs139676599;rs143060452;rs115961201;rs184565252;rs58199976;rs76414065;rs898031;rs79468673;rs74873433;rs148482297;rs4666042;rs189116629;rs13407288
41	2:37075013:A:T	rs1861435	2	37075013	9.32712e-11	37047901	37254035	95	76	2	1	rs1861435
42	2:43490619:A:T	rs58839393	2	43490619	8.00412e-10	43455654	43843950	59	46	2	1	rs58839393
43	2:48962291:G:T	rs17326656	2	48962291	8.9189e-15	48953740	49003623	73	53	8	2	rs17326656;rs75021478
44	2:50002872:A:G	rs13424954	2	50002872	4.73087e-08	49992135	50016697	3	3	1	1	rs13424954
45	2:50691898:A:T	rs1520456	2	50691898	1.40847e-10	50689260	50755067	116	95	5	1	rs1520456
46	2:65287896:A:G	rs2249105	2	65287896	2.25342e-27	65235333	65386462	267	205	10	1	rs2249105
47	2:66677816:C:G	rs1519102	2	66677816	2.04044e-09	66652955	66709468	27	21	2	1	rs1519102
48	2:71509379:C:T	rs2609508	2	71509379	3.63314e-08	71434829	71675408	123	98	1	1	rs2609508
49	2:85788270:A:C	rs10172544	2	85788270	4.41147e-10	85737362	85910799	154	115	3	1	rs10172544
50	2:111873378:C:T	rs4627572	2	111873378	2.72655e-12	111861838	112024305	124	92	3	2	rs4627572;rs17041868
51	2:121347612:C:G	rs11688682	2	121347612	2.68988e-19	121304548	121449337	56	51	7	3	rs7578604;rs11688682;rs10864859
52	2:135268836:A:G	rs60802178	2	135268836	6.26806e-14	135214825	136821878	731	544	13	3	rs60802178;rs4440018;rs182549
53	2:154013361:C:T	rs16832173	2	154013361	4.11959e-08	154009827	154019537	4	4	1	1	rs16832173
54	2:158525226:C:T	rs12694933	2	158525226	3.53638e-08	158525226	158531114	3	3	1	1	rs12694933
55	2:161232131:A:C	rs6761644	2	161232131	3.7555e-09	161080233	161368808	93	69	1	1	rs6761644
56	2:165528876:C:T	rs13389219	2	165528876	1.36133e-116	165235662	165828042	686	534	53	15	rs4667462;rs74660700;rs141360938;rs112355235;rs62173895;rs184776663;rs13389219;rs76383094;rs77669945;rs115631825;rs113238768;rs355863;rs355814;rs10930140;rs10180709
57	2:171639622:A:T	rs6433249	2	171639622	8.2444e-12	171342637	172057078	266	216	3	3	rs2083212;rs6433249;rs13417864
58	2:176422238:G:T	rs79869125	2	176422238	3.29769e-08	176313254	176439632	91	76	1	1	rs79869125
59	2:179017607:G:T	rs191494993	2	179017607	1.33419e-08	179017607	179618640	4	1	1	1	rs191494993
60	2:186029481:C:T	rs13420749	2	186029481	3.67428e-08	185921692	186059597	73	58	1	1	rs13420749
61	2:205373721:A:G	rs10208512	2	205373721	2.53329e-09	205362820	205492910	46	38	2	1	rs10208512
62	2:215377588:A:T	rs4416211	2	215377588	8.8016e-09	215249419	215406636	118	87	2	1	rs4416211
63	2:219590348:A:G	rs148358468	2	219590348	1.50872e-22	219051314	220183796	769	596	23	6	rs6707559;rs191676831;rs2303566;rs148358468;rs61733623;rs79047930
64	2:222316575:G:T	rs2052942	2	222316575	9.7996e-09	222301357	222339657	27	21	1	1	rs2052942
65	2:227095159:C:T	rs2138161	2	227095159	4.84126e-141	226813090	227659583	999	778	53	17	rs115519115;rs11895712;rs62188999;rs34954697;rs1851521;rs72979712;rs1522802;rs150105548;rs114584605;rs114301493;rs55726223;rs2138161;rs115420636;rs71429196;rs77402945;rs6741075;rs12052364
66	2:230128204:G:T	rs7596814	2	230128204	5.54473e-09	230117634	230149762	28	22	1	1	rs7596814
67	2:242237902:C:T	rs59104589	2	242237902	9.95088e-09	242237902	242442728	19	13	2	1	rs59104589
68	3:4757846:C:T	rs9822274	3	4757846	9.41808e-10	4746621	4773465	28	23	1	1	rs9822274
69	3:11511424:C:T	rs6786166	3	11511424	2.51738e-08	11258191	11597087	174	133	1	1	rs6786166
70	3:12396913:A:G	rs71304101	3	12396913	8.49023e-45	11969382	12741345	730	581	32	9	rs305505;rs2347101;rs71304101;rs142397996;rs1152002;rs3103310;rs13091092;rs74399066;rs796172
71	3:15881120:A:G	rs12691219	3	15881120	5.86895e-14	15535910	15973651	405	299	6	1	rs12691219
72	3:18703839:G:T	rs11128898	3	18703839	1.48152e-09	18611283	18824298	147	129	2	1	rs11128898
73	3:24302811:A:G	rs113967141	3	24302811	1.48777e-10	24286322	24520283	20	19	2	2	rs113967141;rs6792725
74	3:47914974:C:T	rs7638388	3	47914974	9.67903e-12	46742749	48322023	459	327	6	3	rs7429588;rs11926707;rs7638388
75	3:49884913:C:T	rs13316065	3	49884913	1.7295e-18	49296069	50209053	525	372	8	2	rs13316065;rs1317571
76	3:52490391:A:G	rs34261027	3	52490391	2.20791e-39	51306345	53174745	1123	912	24	7	rs142393739;rs76005311;rs57172722;rs34261027;rs67409736;rs35333155;rs11713926
77	3:66868310:C:T	rs7639854	3	66868310	2.78668e-09	66853353	66903172	24	19	1	1	rs7639854
78	3:69879323:A:G	rs6805563	3	69879323	6.60598e-09	69792011	69904872	217	178	2	1	rs6805563
79	3:71643451:C:T	rs830663	3	71643451	1.84802e-12	71481192	71684845	156	137	3	2	rs830663;rs112427872
80	3:81978850:A:G	rs9870954	3	81978850	7.48574e-10	81698481	82022078	117	92	2	1	rs9870954
81	3:85652015:C:T	rs73141530	3	85652015	3.1506e-09	85433248	85791383	132	100	1	1	rs73141530
82	3:87037543:A:G	rs13066793	3	87037543	2.08779e-12	87037543	87037543	1	1	1	1	rs13066793
83	3:94120783:C:G	rs7609621	3	94120783	2.92374e-11	93883640	94198182	220	185	2	1	rs7609621
84	3:127306462:C:T	rs79983121	3	127306462	9.72429e-11	127215535	127410033	42	33	1	1	rs79983121
85	3:129307646:C:T	rs2811456	3	129307646	7.34314e-10	129281866	129341403	93	76	3	1	rs2811456
86	3:135955604:C:T	rs895893	3	135955604	5.32729e-40	135537393	137198063	1273	966	28	4	rs36060212;rs895893;rs9839713;rs34011764
87	3:137837557:A:G	rs4678403	3	137837557	7.23809e-09	137829841	137901078	116	93	1	1	rs4678403
88	3:142655290:A:G	rs12638256	3	142655290	9.97293e-11	142640398	142670467	50	41	2	1	rs12638256
89	3:150066540:A:T	rs62271373	3	150066540	1.26335e-39	150018637	150331124	65	61	14	3	rs11712274;rs62271373;rs2868425
90	3:156795414:G:T	rs9817452	3	156795414	3.89267e-14	156791268	156813672	20	17	2	1	rs9817452
91	3:170727739:A:T	rs5402	3	170727739	5.69145e-09	170572112	170755713	144	107	2	1	rs5402
92	3:171785168:C:G	rs9647379	3	171785168	7.22425e-11	171565463	171833266	139	113	3	2	rs6769442;rs9647379
93	3:172294500:A:G	rs79287178	3	172294500	3.52393e-09	172274232	172294500	2	1	1	1	rs79287178
94	3:187628006:G:T	rs7631606	3	187628006	3.20032e-10	187604720	187628472	5	2	1	1	rs7631606
95	3:194124421:A:G	rs11900	3	194124421	1.76466e-08	194109840	194204318	48	37	1	1	rs11900
96	3:196187927:C:G	rs11185542	3	196187927	3.7705e-08	196146039	196233136	50	35	1	1	rs11185542
97	4:965720:A:G	rs13101828	4	965720	8.52137e-12	873286	984870	31	22	5	1	rs13101828
98	4:3443931:A:G	rs13108218	4	3443931	4.66799e-25	2979757	3536329	455	368	38	5	rs3755883;rs2051559;rs13108218;rs1203109;rs7676662
99	4:4990298:A:G	rs4450871	4	4990298	1.99771e-18	4990298	4990298	1	1	1	1	rs4450871
100	4:18031110:C:G	rs34209421	4	18031110	6.32424e-21	17785322	18111537	381	296	6	3	rs2074974;rs34209421;rs6812794
101	4:26065924:C:T	rs12513287	4	26065924	1.35103e-27	25986964	26422507	201	165	17	3	rs1567650;rs12513287;rs113697915
102	4:38659594:A:G	rs34722008	4	38659594	1.09255e-10	38577660	38716721	41	27	2	1	rs34722008
103	4:39693947:A:G	rs59684169	4	39693947	1.9235e-09	39641262	39788949	65	46	3	1	rs59684169
104	4:55521017:A:G	rs2159935	4	55521017	9.69047e-14	55484718	55580596	163	134	7	1	rs2159935
105	4:77396854:C:G	rs11722924	4	77396854	5.04289e-13	77357592	77437749	74	59	4	1	rs11722924
106	4:86931091:C:T	rs7439032	4	86931091	3.31398e-10	86931091	86931091	1	1	1	1	rs7439032
107	4:87976359:A:T	rs1471251	4	87976359	9.33952e-49	87216986	88467172	1362	1025	55	8	rs6813724;rs56414102;rs2705616;rs150710017;rs1471251;rs3755979;rs6853425;rs6845839
108	4:89741269:A:G	rs3822072	4	89741269	2.04286e-22	89615174	89985478	219	173	9	4	rs3775403;rs3017895;rs3822072;rs4425336
109	4:96172075:A:G	rs4699415	4	96172075	2.46587e-08	96121988	96181240	67	55	1	1	rs4699415
110	4:103198082:A:G	rs13135092	4	103198082	1.87343e-26	102702364	103388441	253	191	13	2	rs34166099;rs13135092
111	4:104253889:A:G	rs62338910	4	104253889	3.02404e-09	103640758	104378012	237	163	2	1	rs62338910
112	4:110578226:A:T	rs189866430	4	110578226	9.54807e-36	110095620	110987437	10	9	4	1	rs189866430
113	4:124263310:A:C	rs114236092	4	124263310	7.91218e-09	123782545	124286340	143	112	1	1	rs114236092
114	4:145659064:C:T	rs11727676	4	145659064	3.10986e-08	145621328	145659064	2	2	1	1	rs11727676
115	4:155489608:C:T	rs6054	4	155489608	1.6163e-08	155432943	155489608	26	22	2	2	rs115101063;rs6054
116	4:157683685:C:T	rs1425486	4	157683685	3.28734e-21	157611192	157815950	214	172	6	1	rs1425486
117	5:40828478:C:T	rs389737	5	40828478	3.48423e-09	40684676	40839228	104	77	1	1	rs389737
118	5:52721445:A:C	rs3943929	5	52721445	1.48921e-08	52664796	52739533	167	133	1	1	rs3943929
119	5:53300662:A:G	rs4311394	5	53300662	9.75669e-21	53261330	53503097	242	186	9	2	rs1664789;rs4311394
120	5:54870190:A:C	rs1559213	5	54870190	2.61094e-08	54848774	55014771	132	94	1	1	rs1559213
121	5:55861464:C:T	rs28650790	5	55861464	1.57475e-95	55375172	56919954	600	480	56	18	rs12657780;rs11738745;rs40270;rs115538149;rs154256;rs11951908;rs6896054;rs39837;rs71624136;rs3907158;rs456605;rs188010585;rs28650790;rs66485956;rs6450394;rs185219247;rs34196215;rs832537
122	5:57610069:C:G	rs37538	5	57610069	4.73084e-09	57527886	57647762	23	20	1	1	rs37538
123	5:59391636:C:T	rs12516070	5	59391636	1.4902e-09	59307118	59677842	108	78	2	2	rs12516070;rs12188899
124	5:67714246:A:G	rs4976033	5	67714246	1.27837e-27	67673635	67729637	29	26	4	1	rs4976033
125	5:74289267:C:T	rs6887521	5	74289267	4.14631e-10	74283676	74559534	141	107	2	1	rs6887521
126	5:78471854:C:T	rs10044259	5	78471854	8.29782e-15	78416416	78629346	252	168	4	1	rs10044259
127	5:81569672:A:G	rs55951719	5	81569672	1.34373e-08	81235582	81689066	15	11	1	1	rs55951719
128	5:82815158:A:G	rs115912456	5	82815158	3.47911e-13	82802014	82857040	23	18	5	2	rs115912456;rs309587
129	5:104007433:C:G	rs325501	5	104007433	1.7832e-08	103791044	104082179	178	134	1	1	rs325501
130	5:112388225:C:T	rs6594665	5	112388225	8.82161e-10	112323738	112504458	149	121	5	2	rs6594665;rs7714361
131	5:115970649:A:T	rs150936661	5	115970649	1.65677e-08	115970649	115970649	1	1	1	1	rs150936661
132	5:118728256:A:G	rs7720409	5	118728256	2.16721e-27	118650964	118937595	293	231	13	3	rs7720409;rs61415411;rs257983
133	5:131320462:C:T	rs253942	5	131320462	7.63884e-14	130397106	131704047	59	39	4	2	rs253942;rs3900685
134	5:132444128:A:G	rs72801474	5	132444128	1.79324e-16	132349654	132467373	131	98	4	2	rs9327640;rs72801474
135	5:140098596:G:T	rs12188417	5	140098596	3.10285e-08	140023238	140142174	63	45	1	1	rs12188417
136	5:144501147:C:T	rs76957426	5	144501147	9.09649e-09	144460452	144602295	59	47	1	1	rs76957426
137	5:153169740:C:T	rs1461226	5	153169740	1.57275e-08	153055075	153250819	51	39	1	1	rs1461226
138	5:156391628:C:T	rs6874202	5	156391628	2.59647e-14	156354477	156484648	171	118	3	1	rs6874202
139	5:157989980:C:T	rs2914221	5	157989980	1.54268e-30	157850240	158373495	245	197	14	5	rs77032819;rs10036930;rs181958996;rs2914221;rs116640818
140	5:166729167:A:G	rs113821041	5	166729167	5.83983e-10	166709809	166729167	2	2	1	1	rs113821041
141	5:167867953:A:G	rs4976553	5	167867953	1.43552e-09	167841879	167868431	33	27	2	1	rs4976553
142	5:172746026:C:T	rs17075791	5	172746026	4.11857e-09	172743694	172746539	7	7	1	1	rs17075791
143	5:173353514:C:T	rs747472	5	173353514	8.52431e-12	173269956	173414926	115	104	2	1	rs747472
144	5:176525029:C:G	rs9489	5	176525029	1.10168e-09	176525029	176775851	36	32	2	1	rs9489
145	6:1618966:A:C	rs2569880	6	1618966	9.10807e-10	1613686	1620627	7	5	1	1	rs2569880
146	6:16101755:A:C	rs11751891	6	16101755	1.73782e-08	16092360	16101755	2	2	1	1	rs11751891
147	6:19972602:A:G	rs1931788	6	19972602	2.46911e-08	19910353	19973680	153	120	1	1	rs1931788
148	6:20502195:C:T	rs62398908	6	20502195	1.26993e-12	20481678	20675295	33	30	4	1	rs62398908
149	6:28164414:A:G	rs73740569	6	28164414	1.74455e-09	27895399	28174402	155	97	2	1	rs73740569
150	6:33606524:C:G	rs28360584	6	33606524	9.26166e-09	33579448	33607224	17	10	1	1	rs28360584
151	6:34192036:A:C	rs114760566	6	34192036	2.80727e-31	34067732	35676991	337	221	17	4	rs1592269;rs114760566;rs2820232;rs9296158
152	6:36646788:A:G	rs3176320	6	36646788	1.53172e-11	36616366	36649593	51	43	3	1	rs3176320
153	6:37014978:A:G	rs112366513	6	37014978	3.70507e-08	37014978	37014978	1	1	1	1	rs112366513
154	6:43760327:C:G	rs11967262	6	43760327	1.3126e-124	43683804	43829941	191	158	26	8	rs12193478;rs9381248;rs10434;rs3025053;rs11967262;rs59567991;rs10948097;rs1317983
155	6:52628551:A:G	rs2749019	6	52628551	1.87482e-10	52613931	52738427	143	107	1	1	rs2749019
156	6:55437238:C:T	rs73744635	6	55437238	2.69992e-12	55436342	55459912	11	9	1	1	rs73744635
157	6:72598878:A:G	rs1080064	6	72598878	2.79452e-08	72598878	72600400	3	3	1	1	rs1080064
158	6:86061009:A:C	rs72920452	6	86061009	1.98591e-08	86061009	86099433	2	2	1	1	rs72920452
159	6:98550289:A:C	rs1906252	6	98550289	1.09527e-08	98547979	98591622	33	19	1	1	rs1906252
160	6:106378009:G:T	rs6913325	6	106378009	7.21936e-10	106356046	106406999	27	19	4	2	rs10456852;rs6913325
161	6:107441753:A:G	rs11153046	6	107441753	7.92192e-13	107420270	107446540	33	27	3	1	rs11153046
162	6:109189664:C:G	rs11752394	6	109189664	6.8216e-16	109160380	109271201	95	73	2	1	rs11752394
163	6:111163556:C:T	rs802688	6	111163556	2.518e-09	110991916	111328081	148	115	1	1	rs802688
164	6:127454893:A:G	rs72959041	6	127454893	1.25127e-35	126659043	127532807	842	618	16	6	rs9398803;rs11154370;rs987763;rs184634289;rs1936805;rs72959041
165	6:130354855:C:T	rs9388766	6	130354855	2.35519e-19	130311831	130460244	186	150	11	2	rs9375693;rs9388766
166	6:133811522:A:T	rs598699	6	133811522	2.65282e-10	133096657	133867772	47	32	5	3	rs41286196;rs56017741;rs598699
167	6:139831981:C:T	rs635769	6	139831981	3.65511e-60	139793908	139862897	146	102	18	4	rs6926031;rs3010285;rs635769;rs602261
168	6:140613245:A:G	rs9376512	6	140613245	1.15365e-08	140264321	140779173	284	233	1	1	rs9376512
169	6:152892539:A:G	rs9371609	6	152892539	6.47583e-09	152875862	152916571	12	9	1	1	rs9371609
170	6:153465230:A:C	rs607335	6	153465230	4.34029e-11	153364643	153499921	264	209	3	2	rs1933258;rs607335
171	6:161092438:C:T	rs11751347	6	161092438	4.15974e-38	160273528	161660100	399	313	31	8	rs146203232;rs77881708;rs316173;rs55730499;rs140570886;rs11751347;rs7758766;rs79570361
172	6:163740089:A:G	rs6927207	6	163740089	4.02264e-13	163736204	163745411	26	12	2	1	rs6927207
173	6:164133001:C:T	rs4709746	6	164133001	5.79714e-24	164092291	164137375	20	18	4	1	rs4709746
174	6:166185025:A:G	rs1472267	6	166185025	5.39412e-10	166144207	166195063	24	17	1	1	rs1472267
175	7:1010801:C:G	rs71538127	7	1010801	2.05853e-14	996645	1219553	229	157	11	1	rs71538127
176	7:5574239:C:G	rs852388	7	5574239	5.91951e-10	5572132	5574239	3	3	1	1	rs852388
177	7:12224708:C:T	rs10950390	7	12224708	1.91403e-10	12200060	12285140	159	123	3	1	rs10950390
178	7:15883727:C:G	rs17169104	7	15883727	3.56024e-12	15883552	16092055	169	135	3	1	rs17169104
179	7:17287269:A:T	rs6968865	7	17287269	3.5692e-18	17280513	17403696	43	35	3	1	rs6968865
180	7:17920613:C:T	rs10242866	7	17920613	3.77751e-24	17762064	18041218	487	388	16	1	rs10242866
181	7:23851207:G:T	rs13244529	7	23851207	2.16035e-08	23489874	24100210	9	9	1	1	rs13244529
182	7:25997536:A:G	rs4719841	7	25997536	3.02819e-28	25804343	26422042	388	313	22	4	rs2893221;rs4722551;rs4719841;rs1534696
183	7:28256240:A:G	rs498475	7	28256240	4.03599e-12	28142088	28259233	53	41	3	1	rs498475
184	7:29319249:A:G	rs11980456	7	29319249	3.92534e-10	29315357	29410867	102	85	2	1	rs11980456
185	7:44197583:G:T	rs2070971	7	44197583	1.83771e-11	44191309	44265179	37	29	3	2	rs2070971;rs878521
186	7:46526434:A:C	rs7781417	7	46526434	3.04524e-09	46323827	46581447	283	244	3	1	rs7781417
187	7:73039406:C:G	rs35493868	7	73039406	2.58129e-243	71253553	73663898	816	623	80	24	rs148543887;rs112270966;rs147767686;rs117260553;rs42133;rs42121;rs42120;rs113452856;rs117624871;rs182118140;rs181157713;rs799158;rs62466303;rs35493868;rs74468720;rs4717793;rs73138819;rs141116009;rs10479665;rs10246419;rs148822367;rs145743281;rs810548;rs62476364
188	7:74002323:C:T	rs111914893	7	74002323	3.38635e-13	73992830	74251108	34	22	2	1	rs111914893
189	7:75148813:C:T	rs794373	7	75148813	1.74675e-09	75038408	75183403	50	20	1	1	rs794373
190	7:75664921:C:G	rs10954750	7	75664921	5.39556e-12	75609033	76046324	302	247	6	3	rs41301433;rs10954750;rs6465120
191	7:77417584:C:T	rs1544459	7	77417584	2.49493e-10	77113701	77606013	278	199	3	1	rs1544459
192	7:106632113:A:G	rs12530679	7	106632113	4.64882e-08	106632113	106632113	1	1	1	1	rs12530679
193	7:116534820:A:G	rs964449	7	116534820	1.17256e-09	116357211	116570200	81	64	2	1	rs964449
194	7:129663496:C:T	rs11556924	7	129663496	3.08695e-08	129663496	129685597	2	2	1	1	rs11556924
195	7:130430969:C:T	rs10260148	7	130430969	5.28101e-53	130422934	130585623	100	85	4	2	rs10260148;rs157935
196	7:137631791:C:T	rs273998	7	137631791	1.04405e-08	137612571	137632678	28	24	1	1	rs273998
197	7:150216171:G:T	rs35241484	7	150216171	3.8912e-20	150179028	150660239	652	451	14	4	rs35241484;rs10224387;rs62492368;rs56282717
198	8:4817813:G:T	rs12542818	8	4817813	5.41042e-10	4785698	4838459	94	78	1	1	rs12542818
199	8:9173358:A:G	rs7012814	8	9173358	6.511e-65	8088230	12199830	7946	6357	541	44	rs1878561;rs2140124;rs11989653;rs7003528;rs1814796;rs4841087;rs10503388;rs56373105;rs73199643;rs7819112;rs76448484;rs7012814;rs2169387;rs1461728;rs17662231;rs77705851;rs73204606;rs587059;rs149468507;rs10088365;rs79680096;rs77480704;rs7831557;rs11250022;rs56062414;rs73201168;rs58772184;rs7821812;rs79107778;rs80270292;rs74842363;rs78800805;rs2253946;rs73201420;rs2256629;rs4500049;rs7386288;rs665664…
200	8:12632903:G:T	rs4474021	8	12632903	2.3064e-16	12617857	12651322	28	22	2	1	rs4474021
201	8:18272535:C:T	rs35246381	8	18272535	2.59384e-29	17782868	18291590	326	256	10	4	rs478420;rs34992950;rs35246381;rs78013831
202	8:19874145:C:T	rs4922118	8	19874145	0	18665454	21315549	1703	1328	236	69	rs75873236;rs4922078;rs116998829;rs10085966;rs28623088;rs75466392;rs7835546;rs111251122;rs7005265;rs78604428;rs144473554;rs148339574;rs3758060;rs60329942;rs77312736;rs2119693;rs117860853;rs9694385;rs141522237;rs148048657;rs34761945;rs187013686;rs268;rs144578061;rs308;rs117910839;rs80085105;rs74779858;rs76501116;rs2165557;rs142288236;rs181174350;rs188443653;rs7005359;rs4922118;rs35554437;rs1875449…
203	8:23609009:G:T	rs6983481	8	23609009	1.80099e-13	23572963	23617879	49	37	1	1	rs6983481
204	8:25464670:G:T	rs73221948	8	25464670	5.22831e-12	25464656	25464690	3	3	3	1	rs73221948
205	8:26271120:C:T	rs58153210	8	26271120	1.47329e-09	26125419	26271120	65	56	3	1	rs58153210
206	8:30956654:C:G	rs12549825	8	30956654	8.98608e-10	30835535	30956654	51	39	2	1	rs12549825
207	8:36846109:C:T	rs7816345	8	36846109	4.98447e-13	36658914	36859186	50	38	1	1	rs7816345
208	8:37399290:A:G	rs2407278	8	37399290	1.10489e-10	37381976	37405377	13	13	2	1	rs2407278
209	8:38324616:A:G	rs6994556	8	38324616	7.22255e-09	38321607	38351310	22	18	1	1	rs6994556
210	8:42429676:C:T	rs149448659	8	42429676	1.99118e-09	42429676	42429676	1	1	1	1	rs149448659
211	8:59387337:C:T	rs1580180	8	59387337	3.31387e-12	59311697	59415339	34	29	1	1	rs1580180
212	8:64608119:A:T	rs1149470	8	64608119	1.56187e-11	64498360	64875487	271	217	3	1	rs1149470
213	8:71270004:G:T	rs7818350	8	71270004	1.73157e-09	71017690	71999126	849	631	2	2	rs7818350;rs62508819
214	8:72469742:A:G	rs4738141	8	72469742	6.52809e-18	72392687	72531550	84	71	5	1	rs4738141
215	8:73434705:C:T	rs6992315	8	73434705	2.28852e-08	73426371	73494858	38	28	2	1	rs6992315
216	8:103873091:A:G	rs1991928	8	103873091	3.24368e-11	103816785	103955366	68	53	2	1	rs1991928
217	8:106591207:C:G	rs2343595	8	106591207	2.14576e-08	106320562	106591802	58	50	2	2	rs1552108;rs2343595
218	8:116639462:G:T	rs2737225	8	116639462	3.65828e-22	116464988	116846039	204	184	8	3	rs2737218;rs2737225;rs182757489
219	8:126506694:A:G	rs112875651	8	126506694	0	126098958	126704590	463	371	70	26	rs117781948;rs2954011;rs113416209;rs2980874;rs10091522;rs62521034;rs62521037;rs2980883;rs72655672;rs76993561;rs112875651;rs7012891;rs34529435;rs78309295;rs73706832;rs62523889;rs1963945;rs2124038;rs139020749;rs113106437;rs12549603;rs139827355;rs111382124;rs72724638;rs897157;rs143778508
220	8:128403887:A:G	rs10956365	8	128403887	1.74757e-08	128403887	128403887	1	1	1	1	rs10956365
221	8:144306379:A:G	rs7832515	8	144306379	2.29837e-14	144275144	144470426	277	204	3	2	rs7832515;rs6997726
222	9:1033773:C:G	rs1567353	9	1033773	1.48194e-20	1021951	1057318	42	39	9	2	rs1567353;rs1509202
223	9:11274206:C:T	rs10756218	9	11274206	2.28841e-09	11179005	11847356	534	446	4	1	rs10756218
224	9:13730047:A:G	rs10120807	9	13730047	3.98815e-08	13673639	13736965	62	52	1	1	rs10120807
225	9:16901067:A:C	rs62543565	9	16901067	1.29645e-14	16846260	16913836	74	53	3	1	rs62543565
226	9:33857803:C:T	rs2248071	9	33857803	3.4807e-09	33759363	34360487	148	104	2	1	rs2248071
227	9:86583076:C:T	rs696825	9	86583076	3.23302e-13	86368660	86694759	114	80	3	1	rs696825
228	9:92201811:C:T	rs10752651	9	92201811	1.21362e-13	92011362	92225483	260	206	6	2	rs35394790;rs10752651
229	9:95382297:C:T	rs12686780	9	95382297	1.97677e-16	94939076	95576781	571	449	5	2	rs10820988;rs12686780
230	9:101814852:C:T	rs7019613	9	101814852	6.20656e-09	101804329	101835148	28	24	1	1	rs7019613
231	9:102162570:C:T	rs62565259	9	102162570	2.39677e-11	102104426	102260916	3	2	1	1	rs62565259
232	9:107589567:C:T	rs7024300	9	107589567	1.10076e-13	107585213	107713873	75	55	6	3	rs7024300;rs62568181;rs10820747
233	9:113828811:A:G	rs1008158	9	113828811	1.25716e-08	113828811	113830547	2	2	1	1	rs1008158
234	9:117098650:C:T	rs1044531	9	117098650	2.44829e-16	117098650	117098650	1	1	1	1	rs1044531
235	9:119258187:C:T	rs767432	9	119258187	1.47705e-11	119051593	119258187	82	72	5	2	rs7862256;rs767432
236	9:123487903:A:G	rs2004354	9	123487903	3.48132e-10	123354222	123507855	127	100	1	1	rs2004354
237	9:131562232:A:G	rs2417125	9	131562232	2.50606e-09	131561110	131652063	91	69	1	1	rs2417125
238	9:136149830:A:G	rs532436	9	136149830	1.33142e-12	136137065	136155000	50	32	2	1	rs532436
239	9:137175998:A:G	rs72619338	9	137175998	8.57142e-09	137175269	137175998	2	1	1	1	rs72619338
240	10:13670441:A:G	rs10906428	10	13670441	1.11062e-08	13636301	13692888	26	23	1	1	rs10906428
241	10:33970319:C:T	rs16934748	10	33970319	1.90718e-08	33951730	34019293	59	45	2	1	rs16934748
242	10:52616492:A:G	rs150770378	10	52616492	4.6159e-19	52573772	52718339	5	2	2	1	rs150770378
243	10:61429527:A:G	rs11006681	10	61429527	1.18172e-10	61397399	61469538	31	26	2	1	rs11006681
244	10:65133822:A:G	rs7923609	10	65133822	2.39701e-44	64761091	65400352	1175	900	26	3	rs146334713;rs7923609;rs7915671
245	10:71883836:A:C	rs41277978	10	71883836	7.63537e-09	71883836	71883836	1	1	1	1	rs41277978
246	10:74711376:C:T	rs11000468	10	74711376	2.34915e-10	74131542	74714177	431	325	2	2	rs11000468;rs3829126
247	10:77257791:G:T	rs4617527	10	77257791	1.40715e-10	77170685	77372699	73	60	3	1	rs4617527
248	10:89790128:C:G	rs6586115	10	89790128	2.07719e-14	89548270	89901708	126	102	8	2	rs6586115;rs2184698
249	10:94839724:G:T	rs4418728	10	94839724	4.56049e-35	93478421	95360964	1073	803	50	12	rs2792022;rs17875327;rs7100186;rs835279;rs117545698;rs12783274;rs4418728;rs11187287;rs1222925;rs72819010;rs113344423;rs36014035
250	10:99772190:C:T	rs565108	10	99772190	3.8063e-15	99694970	99851082	84	65	5	1	rs565108
251	10:113922728:A:G	rs2803611	10	113922728	2.3587e-32	113883047	114050642	204	152	11	2	rs2803611;rs2419605
252	10:115798895:A:G	rs2773469	10	115798895	7.86895e-17	115755182	115819694	105	93	6	3	rs454374;rs72823020;rs2773469
253	10:119190933:C:T	rs145155595	10	119190933	5.24125e-09	119190933	119190933	1	1	1	1	rs145155595
254	10:122984213:C:G	rs7098079	10	122984213	2.28275e-13	122972439	123000639	42	35	3	1	rs7098079
255	10:126383363:C:T	rs4450131	10	126383363	1.27877e-08	126320721	126383363	20	18	1	1	rs4450131
256	10:134459388:A:G	rs1133400	10	134459388	1.7944e-10	134413500	134459388	3	3	1	1	rs1133400
257	11:380315:C:T	rs117291242	11	380315	4.79316e-08	380315	408174	2	2	1	1	rs117291242
258	11:823586:C:G	rs140201358	11	823586	1.72175e-10	823586	823586	1	1	1	1	rs140201358
259	11:1881256:C:T	rs587961	11	1881256	2.13264e-10	1874845	1885117	16	15	2	1	rs587961
260	11:2861578:G:T	rs10741726	11	2861578	3.14829e-08	2861578	2861578	1	1	1	1	rs10741726
261	11:10675738:A:G	rs10840457	11	10675738	3.63961e-14	10376420	10699750	98	78	4	2	rs12793175;rs10840457
262	11:13355770:C:T	rs6486121	11	13355770	3.56844e-16	13296561	13370535	76	66	4	1	rs6486121
263	11:14561945:C:G	rs79634051	11	14561945	3.28e-13	14133432	15090794	40	32	5	4	rs76613195;rs79634051;rs144438564;rs117776155
264	11:17769132:A:C	rs7938573	11	17769132	1.82066e-09	17762862	17783101	18	16	1	1	rs7938573
265	11:24727178:A:G	rs74528759	11	24727178	4.05617e-08	24698914	24727178	4	4	1	1	rs74528759
266	11:26281664:C:G	rs1461396	11	26281664	1.48773e-12	26046964	26363333	362	280	3	1	rs1461396
267	11:27723334:A:G	rs56133711	11	27723334	1.20008e-11	27455582	27748493	92	71	3	1	rs56133711
268	11:30533622:C:T	rs546240	11	30533622	1.80822e-08	30217503	30570596	145	106	3	1	rs546240
269	11:47276350:C:G	rs59663860	11	47276350	2.44307e-57	45712502	51581244	3389	2504	83	21	rs80164982;rs11038647;rs77756595;rs80078546;rs4756066;rs147244995;rs55971594;rs7130812;rs2291120;rs59663860;rs11570051;rs74524842;rs58405523;rs113408284;rs190716785;rs146427736;rs34933432;rs182845132;rs12366190;rs78297458;rs12422125
270	11:54796787:C:T	rs111514504	11	54796787	1.02932e-14	54713805	57153948	811	620	15	6	rs111514504;rs145374954;rs78460947;rs77916918;rs12797544;rs11607950
271	11:61592362:A:G	rs174566	11	61592362	6.06005e-131	61405178	61870328	395	321	46	13	rs11230796;rs628993;rs61897792;rs174566;rs174569;rs139957766;rs73487492;rs7115739;rs7394871;rs174480;rs2727260;rs12799017;rs148302986
272	11:62328854:A:G	rs11231145	11	62328854	4.87693e-17	62309787	62447563	121	87	3	1	rs11231145
273	11:64031241:C:T	rs35169799	11	64031241	6.38511e-44	63788388	65663547	247	192	15	4	rs191264400;rs10750766;rs117104648;rs601863
274	11:66066993:G:T	rs4930352	11	66066993	1.23094e-14	66064821	66182450	31	27	4	2	rs4930352;rs144718240
275	11:67924559:A:G	rs6591334	11	67924559	9.63745e-09	67924559	68000579	20	17	2	1	rs6591334
276	11:68603346:C:T	rs11228377	11	68603346	6.09509e-10	68593134	68722306	41	34	2	1	rs11228377
277	11:69299537:C:G	rs4980659	11	69299537	1.8624e-11	69275865	69307444	15	15	3	1	rs4980659
278	11:77777334:A:C	rs608550	11	77777334	1.50507e-08	77749062	77823557	25	21	1	1	rs608550
279	11:78384794:A:G	rs149119675	11	78384794	9.29889e-09	78348809	78384794	2	1	1	1	rs149119675
280	11:95320808:C:T	rs11021232	11	95320808	4.58053e-08	95298828	95320808	4	4	1	1	rs11021232
281	11:109979945:C:T	rs10789752	11	109979945	2.65803e-11	109959102	110033291	97	78	2	1	rs10789752
282	11:111458659:C:T	rs117869718	11	111458659	5.624e-14	111320003	111988926	209	161	6	2	rs117869718;rs7114594
283	11:116581259:C:T	rs61905072	11	116581259	0	116133227	117562289	2688	2106	274	75	rs77081377;rs187217942;rs12280893;rs10047413;rs17119701;rs1108627;rs1508103;rs883863;rs55960868;rs74873767;rs11216020;rs61904849;rs11216023;rs76376430;rs61904855;rs1240658;rs61906060;rs11216058;rs74948313;rs523549;rs481843;rs34125463;rs74792494;rs1145210;rs145316097;rs11216101;rs61905072;rs141414463;rs11216122;rs193108398;rs17519079;rs1268353;rs74773964;rs113271699;rs3135507;rs45611741;rs75919952…
284	11:118194647:C:G	rs141752759	11	118194647	3.18047e-09	118194647	118399100	5	5	1	1	rs141752759
285	11:118928253:C:T	rs2509121	11	118928253	2.18892e-17	118793479	118961231	104	72	4	2	rs192113495;rs2509121
286	11:121800971:A:G	rs1622638	11	121800971	5.04808e-11	121800971	121822656	20	17	1	1	rs1622638
287	11:126137854:A:G	rs7130615	11	126137854	8.31686e-09	126110318	126229617	57	51	2	1	rs7130615
288	12:370914:A:G	rs495973	12	370914	1.01823e-08	367902	518986	187	139	1	1	rs495973
289	12:4328521:A:G	rs117233107	12	4328521	2.30875e-18	4175561	4328521	4	4	3	1	rs117233107
290	12:6690190:A:C	rs55670476	12	6690190	9.10142e-14	6580443	6739907	120	84	5	2	rs7973027;rs55670476
291	12:20470199:A:G	rs11045171	12	20470199	5.47442e-35	20386237	20643574	133	107	14	4	rs1373571;rs11045171;rs12369443;rs7134150
292	12:21343886:A:G	rs67981690	12	21343886	4.05311e-12	21076233	21415496	69	44	4	2	rs182522580;rs67981690
293	12:24031006:A:G	rs7309072	12	24031006	2.27846e-09	24031006	24068456	15	12	1	1	rs7309072
294	12:26463082:C:T	rs11048456	12	26463082	2.85278e-21	26253557	26532354	213	177	12	3	rs7977928;rs10842680;rs11048456
295	12:27020853:C:T	rs7305031	12	27020853	8.01668e-10	26809412	27402759	78	69	4	2	rs11614652;rs7305031
296	12:34276084:C:G	rs11494834	12	34276084	2.27706e-10	33691010	34856670	1366	1046	2	2	rs11494834;rs12367445
297	12:38724475:C:T	rs7968510	12	38724475	3.47053e-10	37856814	39331847	1732	1170	3	1	rs7968510
298	12:46215895:C:T	rs35763453	12	46215895	1.37892e-08	45979963	46267260	13	11	2	2	rs73108788;rs35763453
299	12:54425000:G:T	rs56270790	12	54425000	3.86374e-13	54385599	54445218	46	31	2	1	rs56270790
300	12:56467865:C:G	rs10876869	12	56467865	1.17197e-10	56368078	56609885	60	40	3	1	rs10876869
301	12:57219622:C:T	rs61937819	12	57219622	3.14389e-11	57116249	57233350	21	13	1	1	rs61937819
302	12:57843711:A:G	rs2229357	12	57843711	2.2694e-31	57558505	58233894	208	167	15	4	rs2229357;rs117789735;rs4760255;rs111830825
303	12:62838230:C:T	rs113439801	12	62838230	2.70963e-08	62832042	63033387	66	49	1	1	rs113439801
304	12:65902265:C:T	rs145775785	12	65902265	3.35084e-11	65869436	65902265	2	2	1	1	rs145775785
305	12:66359752:A:C	rs8756	12	66359752	5.78057e-15	66165179	66389968	99	82	4	2	rs2947793;rs8756
306	12:67645247:A:T	rs775633	12	67645247	6.1662e-10	67638704	67790676	220	179	1	1	rs775633
307	12:77453226:G:T	rs310796	12	77453226	9.65498e-09	77450413	77497965	4	4	1	1	rs310796
308	12:84059739:C:T	rs1391073	12	84059739	1.17652e-08	83863748	84171308	181	135	1	1	rs1391073
309	12:102776566:C:T	rs2946830	12	102776566	1.11154e-08	102394872	102931066	212	175	4	2	rs2946830;rs865927
310	12:107205390:A:G	rs7977765	12	107205390	3.22539e-13	106790740	107469448	200	156	6	1	rs7977765
311	12:109699616:C:T	rs9788220	12	109699616	2.79113e-11	109685093	109718893	19	17	1	1	rs9788220
312	12:111932800:C:T	rs7137828	12	111932800	2.16746e-23	111662578	112906415	179	148	7	1	rs7137828
313	12:117166462:G:T	rs7314462	12	117166462	7.07961e-10	117146344	117177096	22	19	2	1	rs7314462
314	12:124409502:A:G	rs7133378	12	124409502	2.76222e-69	122209033	125380232	2834	2149	151	40	rs11043221;rs11043298;rs28643366;rs1043771;rs116896792;rs34773022;rs61955003;rs6489191;rs645987;rs112003348;rs73226103;rs3104614;rs138436155;rs2292137;rs12313006;rs117942921;rs80172058;rs10773000;rs73216951;rs143928387;rs786452;rs6488898;rs4930731;rs34934281;rs141193534;rs112772143;rs7133378;rs57818143;rs825452;rs117655240;rs11057457;rs9888360;rs143786003;rs74902694;rs867429;rs12230272;rs921919;r…
315	13:25832230:A:C	rs9319211	13	25832230	3.63734e-09	25803096	25913798	63	45	2	1	rs9319211
316	13:29145323:A:C	rs1340819	13	29145323	2.14896e-09	29141836	29145323	2	2	1	1	rs1340819
317	13:31017268:A:G	rs12856169	13	31017268	7.03048e-10	30989792	31043841	71	47	2	1	rs12856169
318	13:50707087:C:G	rs2812208	13	50707087	1.38364e-14	50125997	51131351	164	116	11	3	rs9526627;rs2812208;rs536338
319	13:58257667:A:T	rs6561937	13	58257667	1.03495e-08	58252801	58716228	162	130	2	2	rs6561937;rs9563576
320	13:71827859:A:G	rs12853763	13	71827859	1.82055e-10	71803515	71839582	23	17	1	1	rs12853763
321	13:74146049:C:T	rs4885108	13	74146049	2.01377e-13	74104887	74225948	171	122	6	1	rs4885108
322	13:99245866:C:T	rs9584870	13	99245866	4.25858e-09	99236471	99245866	9	4	1	1	rs9584870
323	13:111038395:A:G	rs61963197	13	111038395	6.29193e-10	111015628	111043309	68	48	2	1	rs61963197
324	13:112188236:C:T	rs2528787	13	112188236	3.82554e-08	112188236	112245769	33	27	2	1	rs2528787
325	13:114544024:C:T	rs7140110	13	114544024	8.19669e-23	114312605	114847659	459	310	21	5	rs11259842;rs71437250;rs7140110;rs75073260;rs7334688
326	14:24560159:A:G	rs79873985	14	24560159	1.52589e-08	24534337	24859553	6	5	1	1	rs79873985
327	14:52480621:A:G	rs6572807	14	52480621	2.86884e-12	52363937	52499670	50	38	3	2	rs117311385;rs6572807
328	14:64239351:C:T	rs12897637	14	64239351	2.51526e-11	64227596	64241914	22	16	1	1	rs12897637
329	14:69142390:A:G	rs4902630	14	69142390	7.18033e-11	69138371	69311424	54	42	3	2	rs4902630;rs2236263
330	14:71541026:C:T	rs2240533	14	71541026	3.73208e-16	71350617	71613451	315	212	3	1	rs2240533
331	14:77518204:C:T	rs61991652	14	77518204	9.3145e-12	77453862	77542574	82	59	6	1	rs61991652
332	14:90034799:C:T	rs8021491	14	90034799	2.31282e-09	89789645	90046070	36	29	2	2	rs3825667;rs8021491
333	14:100765823:C:T	rs61993685	14	100765823	3.3648e-11	100428820	100765823	11	7	2	1	rs61993685
334	14:105256581:C:T	rs2498787	14	105256581	1.62356e-09	105248470	105277209	51	37	3	2	rs2498787;rs34284721
335	15:31637569:C:G	rs28510484	15	31637569	1.74366e-09	31637569	31660799	5	5	1	1	rs28510484
336	15:35836522:A:G	rs1838232	15	35836522	1.85603e-09	35730927	35928603	66	53	1	1	rs1838232
337	15:39444679:G:T	rs275184	15	39444679	7.34178e-16	39407849	39668870	99	83	5	2	rs275184;rs28790585
338	15:44027885:C:T	rs139974673	15	44027885	4.89172e-100	40385088	45001900	1390	1075	54	10	rs588739;rs34245505;rs72735627;rs7163989;rs7170463;rs184334219;rs62019360;rs139974673;rs2733214;rs1901529
339	15:57538801:A:T	rs935328	15	57538801	2.67737e-08	57078313	57590442	209	166	1	1	rs935328
340	15:58674051:A:G	rs62001736	15	58674051	1.293e-14	58671559	58712973	52	46	5	1	rs62001736
341	15:61957236:A:G	rs3848125	15	61957236	1.20909e-16	61911757	62000727	65	56	5	1	rs3848125
342	15:63404639:C:G	rs2729780	15	63404639	6.99755e-24	63329128	64181604	936	718	32	3	rs2729780;rs17184382;rs62011345
343	15:66872114:C:T	rs4776793	15	66872114	8.14121e-16	66696735	66914745	84	66	7	3	rs1549854;rs4776793;rs113411992
344	15:67339646:A:G	rs12905780	15	67339646	5.06186e-09	67317067	67361785	17	16	1	1	rs12905780
345	15:73618238:C:T	rs3826043	15	73618238	1.36372e-11	73431600	73850508	69	66	3	3	rs3826043;rs77688257;rs148279991
346	15:74649262:C:T	rs11072479	15	74649262	1.51679e-08	74599997	74671937	57	47	1	1	rs11072479
347	16:1255832:C:T	rs35482321	16	1255832	5.92398e-11	949766	1255885	174	142	3	2	rs12600110;rs35482321
348	16:2472314:C:G	rs4480804	16	2472314	5.36228e-09	2431804	2506130	179	127	1	1	rs4480804
349	16:4488191:A:G	rs28577186	16	4488191	2.34649e-09	4447771	4677497	137	110	2	1	rs28577186
350	16:12652808:G:T	rs9931809	16	12652808	4.05306e-08	12642407	12672390	224	144	1	1	rs9931809
351	16:15150505:A:C	rs12928099	16	15150505	1.58408e-41	14475560	15881206	444	289	30	6	rs10048117;rs55994124;rs62037490;rs12928099;rs4985122;rs153805
352	16:23805492:A:C	rs194808	16	23805492	9.08082e-10	23756216	23869285	93	74	1	1	rs194808
353	16:30011618:C:T	rs12921996	16	30011618	1.86105e-16	29904221	30147265	186	145	3	2	rs60683614;rs12921996
354	16:31014179:C:T	rs9926533	16	31014179	2.91276e-09	30878863	31149142	74	51	1	1	rs9926533
355	16:56989830:A:G	rs12923459	16	56989830	0	56200927	57405159	932	760	153	54	rs3811361;rs150911013;rs375054;rs75152587;rs59238099;rs117777471;rs7198676;rs4784721;rs75566930;rs76058070;rs187633251;rs11643205;rs113948025;rs62035923;rs11640954;rs148931404;rs141724276;rs3794655;rs182185879;rs146571693;rs72786781;rs12444708;rs9938160;rs12448528;rs147464145;rs7200805;rs12923459;rs4783961;rs35619327;rs148654654;rs187468344;rs11644475;rs181381869;rs289718;rs56208677;rs71387147;rs…
356	16:65795865:A:G	rs72784561	16	65795865	3.58585e-08	65790198	65836638	39	34	2	1	rs72784561
357	16:67940350:A:G	rs55781197	16	67940350	3.57913e-19	66971780	68409535	777	598	16	5	rs79764783;rs139441784;rs897901;rs8055254;rs55781197
358	16:70369864:C:G	rs35332782	16	70369864	4.33909e-12	69547741	70541308	249	180	8	2	rs4783718;rs35332782
359	16:72075593:A:T	rs12924886	16	72075593	1.28135e-22	71582994	72912880	225	196	16	3	rs11865615;rs12924886;rs34417180
360	16:75305331:A:C	rs4888368	16	75305331	3.93497e-08	75304497	75491327	318	233	1	1	rs4888368
361	16:81534790:C:T	rs2925979	16	81534790	5.07973e-59	81449060	81617860	157	122	19	5	rs2550733;rs80340955;rs74986809;rs2925979;rs7189295
362	16:85150163:A:G	rs79311290	16	85150163	1.94671e-17	85150163	85279573	44	33	3	2	rs79311290;rs7191038
363	16:86435896:C:G	rs3862474	16	86435896	7.19844e-09	86416394	86447579	46	41	5	3	rs3862474;rs72814598;rs1317405
364	16:88003242:A:G	rs4843752	16	88003242	4.75809e-14	87981585	88139843	288	211	7	1	rs4843752
365	16:88536774:A:T	rs870021	16	88536774	3.30283e-08	88515576	88553198	61	48	1	1	rs870021
366	17:481604:C:T	rs11870735	17	481604	5.21367e-13	291564	617869	91	51	5	1	rs11870735
367	17:4692640:G:T	rs79202680	17	4692640	2.2209e-10	4549802	5387331	61	42	4	1	rs79202680
368	17:7557834:C:T	rs1642764	17	7557834	4.70129e-15	6989296	7625063	238	166	21	6	rs188743906;rs12449427;rs12946520;rs1143015;rs1642764;rs7141
369	17:17458353:A:G	rs7215055	17	17458353	5.3787e-21	17359619	18846654	725	543	22	7	rs1242503;rs70965415;rs7215055;rs56157833;rs12450799;rs2461838;rs71372293
370	17:37810218:C:G	rs881844	17	37810218	3.32132e-12	37396201	38089717	534	422	5	1	rs881844
371	17:41926126:C:T	rs72836561	17	41926126	1.22336e-140	40394367	42628213	748	566	51	12	rs646123;rs55999482;rs144727181;rs8176151;rs11658713;rs6503468;rs62078657;rs72836561;rs11867362;rs72836567;rs1476512;rs45445495
372	17:43194413:C:T	rs112162280	17	43194413	1.35229e-10	43187221	43201240	8	7	2	1	rs112162280
373	17:46197755:A:G	rs10775406	17	46197755	2.52505e-15	45882237	46554456	375	288	7	2	rs80347400;rs10775406
374	17:46957987:A:G	rs595767	17	46957987	1.13229e-14	46835629	47461511	406	304	9	2	rs595767;rs2960164
375	17:48625928:C:G	rs8076632	17	48625928	8.56393e-10	48624523	48656433	19	14	2	1	rs8076632
376	17:64224775:C:T	rs8178824	17	64224775	6.23916e-17	63772152	64316544	116	99	4	3	rs35337556;rs76731691;rs8178824
377	17:65887896:A:G	rs8079754	17	65887896	8.93506e-28	65762341	66158952	541	373	11	1	rs8079754
378	17:66879927:C:T	rs34931250	17	66879927	1.68876e-12	66823805	66900804	3	2	1	1	rs34931250
379	17:68454400:A:G	rs9904355	17	68454400	2.91591e-12	68346332	68511145	80	67	3	1	rs9904355
380	17:70299163:A:G	rs6501530	17	70299163	7.51193e-10	70270854	70299447	16	13	1	1	rs6501530
381	17:73374945:A:G	rs4789182	17	73374945	5.80559e-12	73249256	73878654	275	192	4	3	rs4789182;rs2198594;rs9900933
382	17:74207943:A:G	rs56257305	17	74207943	5.85972e-15	74155099	74303832	159	115	4	2	rs56257305;rs193220
383	17:76397334:A:C	rs12451715	17	76397334	1.28497e-21	76361175	76833916	217	175	9	2	rs12451715;rs6501250
384	18:287534:A:G	rs6506032	18	287534	6.80879e-14	36726	294906	235	119	9	2	rs60205347;rs6506032
385	18:2846812:A:T	rs11664106	18	2846812	1.37277e-15	2846499	2846812	2	2	1	1	rs11664106
386	18:19905141:C:T	rs35321365	18	19905141	6.46138e-16	19848836	19913064	93	79	3	1	rs35321365
387	18:20718818:A:T	rs9962540	18	20718818	5.58782e-11	20716014	20719164	4	3	1	1	rs9962540
388	18:21115060:A:G	rs6507716	18	21115060	6.1609e-11	21075441	21165409	77	57	1	1	rs6507716
389	18:40750455:C:T	rs2161796	18	40750455	8.65991e-09	40613840	40868373	196	165	2	1	rs2161796
390	18:41464934:C:T	rs2045668	18	41464934	2.97002e-08	41457786	41490329	33	28	1	1	rs2045668
391	18:42485401:C:T	rs615952	18	42485401	4.02782e-08	42437417	42525509	38	27	1	1	rs615952
392	18:47169989:C:T	rs1970696	18	47169989	3.90183e-24	46578242	47698555	165	136	20	5	rs2000813;rs74558535;rs77960347;rs1970696;rs12965067
393	18:53210302:G:T	rs613872	18	53210302	3.28277e-08	53210302	53398626	17	15	1	1	rs613872
394	18:56118358:C:T	rs41292412	18	56118358	1.85305e-14	56089858	56232799	5	5	3	1	rs41292412
395	18:57739072:C:T	rs11664369	18	57739072	4.11799e-14	57730096	58017249	248	204	5	2	rs11664369;rs59992789
396	18:60845884:C:T	rs12454712	18	60845884	2.42299e-19	60845884	60878883	33	30	2	1	rs12454712
397	19:4028783:C:T	rs2289863	19	4028783	5.68822e-10	4024982	4148178	16	14	5	3	rs2289863;rs79182576;rs72978958
398	19:4966041:C:T	rs35502362	19	4966041	2.61216e-10	4944555	5028094	32	22	2	1	rs35502362
399	19:7220013:C:G	rs62112763	19	7220013	6.03405e-24	7125518	7298592	167	124	16	4	rs1799816;rs2396187;rs62112763;rs8101064
400	19:8429323:A:G	rs116843064	19	8429323	1.03692e-146	7880469	8829627	677	495	56	12	rs3745383;rs4804833;rs117000967;rs11880745;rs8109717;rs111500536;rs35947568;rs116843064;rs2967614;rs10404380;rs4804311;rs7253583
401	19:11293467:C:T	rs35312489	19	11293467	4.20686e-11	11284891	11348521	74	54	3	2	rs35312489;rs138572354
402	19:18397788:A:G	rs12463315	19	18397788	2.24487e-12	18343185	18408519	113	86	3	1	rs12463315
403	19:19379549:C:T	rs58542926	19	19379549	4.52799e-67	19063559	20031017	491	391	27	8	rs116962777;rs150057262;rs58542926;rs145462963;rs78916915;rs10417097;rs11668053;rs190050765
404	19:32899293:A:G	rs2012353	19	32899293	9.15131e-09	32819841	32994338	69	55	2	1	rs2012353
405	19:33891013:A:T	rs62102718	19	33891013	2.22771e-35	33714369	34044856	383	313	28	6	rs34529542;rs73024215;rs56361048;rs62102718;rs12459381;rs12609149
406	19:35551428:A:C	rs58895965	19	35551428	9.32971e-16	35537706	35566151	62	47	6	2	rs58895965;rs1672991
407	19:38950393:A:G	rs73930587	19	38950393	1.36476e-10	38916325	38953244	23	19	2	1	rs73930587
408	19:40753001:C:T	rs117090198	19	40753001	2.74205e-11	40409722	40753001	3	3	1	1	rs117090198
409	19:41754430:A:G	rs35538872	19	41754430	2.16867e-09	41663711	41969706	31	16	2	2	rs67033402;rs35538872
410	19:44153100:A:G	rs4760	19	44153100	7.08747e-11	44153100	44153100	1	1	1	1	rs4760
411	19:45416178:G:T	rs483082	19	45416178	8.53283e-196	45269725	45812354	401	312	63	26	rs112450640;rs2889414;rs139997344;rs28399607;rs147711004;rs151073910;rs12978931;rs41290120;rs11673139;rs79701229;rs283814;rs117310449;rs1160984;rs769446;rs483082;rs1064725;rs117664574;rs60049679;rs5112;rs141441332;rs71352241;rs138692741;rs117261169;rs2376867;rs114248186;rs12971645
412	19:46178661:C:T	rs2238689	19	46178661	5.35775e-15	46147527	46499537	215	158	11	4	rs4802269;rs2238689;rs11672020;rs8104599
413	19:46868385:A:G	rs62136106	19	46868385	3.08637e-09	46847901	46894786	23	22	1	1	rs62136106
414	19:47563751:C:T	rs62136855	19	47563751	2.36132e-08	47559074	47589895	26	18	1	1	rs62136855
415	19:49259529:A:G	rs838133	19	49259529	2.75765e-21	49103447	49279227	163	133	12	2	rs838133;rs62132810
416	19:49970793:A:G	rs62128073	19	49970793	4.5642e-08	49970793	50012574	4	4	1	1	rs62128073
417	19:53601172:C:T	rs11670364	19	53601172	2.83138e-08	53584736	53622404	13	9	1	1	rs11670364
418	19:54793280:C:T	rs56883673	19	54793280	2.60206e-18	54752217	54837635	118	80	9	2	rs12975366;rs56883673
419	19:56102362:A:G	rs12610709	19	56102362	2.10237e-15	56077305	56214163	60	46	4	1	rs12610709
420	19:57488280:A:G	rs11670474	19	57488280	2.19383e-09	57480893	57488423	11	11	1	1	rs11670474
421	20:571467:A:C	rs144033177	20	571467	5.79928e-15	553269	571467	5	5	3	2	rs282146;rs144033177
422	20:1397410:A:G	rs6042117	20	1397410	1.36144e-08	1168774	1441841	53	51	3	2	rs6134143;rs6042117
423	20:32905161:G:T	rs6088461	20	32905161	2.70017e-12	31938220	33529766	684	485	8	2	rs149142833;rs6088461
424	20:38543968:C:T	rs12480662	20	38543968	2.17242e-08	38490795	38570656	18	17	1	1	rs12480662
425	20:39227946:C:T	rs6102057	20	39227946	1.41217e-11	39142516	39234223	89	76	3	2	rs2207132;rs6102057
426	20:39662225:C:G	rs6129733	20	39662225	7.45792e-12	39656342	39970544	241	192	5	1	rs6129733
427	20:42337875:C:G	rs285171	20	42337875	1.1926e-08	42230695	42349984	40	33	1	1	rs285171
428	20:43042364:C:T	rs1800961	20	43042364	1.48442e-18	43030435	43042364	3	3	3	1	rs1800961
429	20:44551855:C:T	rs6073958	20	44551855	3.89562e-133	44027134	45003211	1444	1097	60	18	rs3746592;rs34382722;rs6032360;rs232262;rs11569671;rs148773337;rs6130969;rs6073958;rs62213343;rs6094229;rs58749629;rs145802687;rs143491521;rs144858460;rs12373874;rs2297199;rs56050009;rs11696696
430	20:45597546:C:T	rs6066141	20	45597546	5.13624e-22	45487607	45606853	84	68	7	2	rs4809604;rs6066141
431	20:46340974:A:G	rs6018652	20	46340974	2.18996e-11	46338017	46342197	5	5	1	1	rs6018652
432	20:51235613:A:G	rs6068280	20	51235613	2.70817e-11	50914231	51264331	434	329	4	1	rs6068280
433	20:51568950:A:G	rs6097170	20	51568950	4.68898e-08	51551395	51577593	5	4	1	1	rs6097170
434	20:55836040:A:G	rs6123685	20	55836040	7.09208e-17	55836040	56148376	95	81	8	3	rs6123685;rs7274718;rs17847710
435	20:56810446:A:G	rs633276	20	56810446	1.04821e-08	56798017	56861637	31	25	1	1	rs633276
436	20:57466093:G:T	rs185799410	20	57466093	1.24828e-10	57434900	57466093	5	4	1	1	rs185799410
437	20:62711459:C:T	rs8126001	20	62711459	1.72866e-11	62692060	62712053	16	13	2	1	rs8126001
438	21:16415732:C:T	rs7280197	21	16415732	2.17891e-09	16257319	16435223	17	13	3	2	rs11702776;rs7280197
439	21:16862737:C:T	rs2823303	21	16862737	1.07719e-09	16843097	16867882	25	18	1	1	rs2823303
440	21:40553845:C:T	rs6517522	21	40553845	4.02511e-09	40516308	40719241	250	183	1	1	rs6517522
441	22:29453193:C:G	rs12321	22	29453193	1.82341e-08	29448643	29455687	16	9	1	1	rs12321
442	22:36042986:C:T	rs9610329	22	36042986	1.73638e-10	36029739	36042986	12	7	1	1	rs9610329
443	22:38599767:C:G	rs4820323	22	38599767	5.5328e-37	38449394	39159724	680	525	20	4	rs6001006;rs4820323;rs75520567;rs2071887
Abbreviations: GWAS, genome-wide association study; IR, insulin resistance; NGWAMA, N-weighted genome-wide association meta-analysis; SNP, single nucleotide polymorphism.

## Sheet: ST3
Supplementary Table 3. Independent genome-wide significant signals associated with mvIR_MTAG
GenomicLocus	uniqID	rsID	Chromosome	Position	P value	start	end	N SNPs	N GWAS SNPs	N Ind Sig SNPs	N Lead SNPs	Lead SNPs
1	1:11233559:C:T	rs4845852	1	11233559	7.80549e-09	11099788	11365015	212	132	1	1	rs4845852
2	1:15874158:A:C	rs11585044	1	15874158	6.5796e-09	15803338	16046109	160	98	1	1	rs11585044
3	1:26987646:A:G	rs193084249	1	26987646	4.15045e-27	26933591	27335529	274	173	6	2	rs193084249;rs12758606
4	1:40035928:G:T	rs3768321	1	40035928	1.84008e-31	39550621	40441964	582	398	20	3	rs3768321;rs72665235;rs61781290
5	1:50852249:A:G	rs2784135	1	50852249	1.02081e-11	50828316	51532590	456	330	2	1	rs2784135
6	1:62991905:C:T	rs12062275	1	62991905	7.89205e-45	62834094	63358816	632	403	13	1	rs12062275
7	1:93836218:A:C	rs698927	1	93836218	5.0781e-10	93539383	93891839	256	163	2	1	rs698927
8	1:109817192:A:G	rs7528419	1	109817192	6.88035e-10	109816863	109822166	12	10	1	1	rs7528419
9	1:110500175:C:T	rs11577194	1	110500175	2.74755e-09	110470764	110504663	13	11	2	2	rs333947;rs11577194
10	1:149869351:A:G	rs6587680	1	149869351	4.89114e-10	149729337	149997588	189	95	1	1	rs6587680
11	1:154254317:A:G	rs12135346	1	154254317	1.21477e-08	154239334	154260361	11	4	1	1	rs12135346
12	1:172352990:A:G	rs714515	1	172352990	5.33538e-15	172302544	172453840	109	85	5	1	rs714515
13	1:203518382:C:T	rs2821231	1	203518382	2.54073e-11	203507163	203540591	29	1	1	1	rs2821231
14	1:205261963:C:T	rs10157145	1	205261963	6.82078e-10	205012106	205268803	170	122	4	1	rs10157145
15	1:219668252:A:C	rs1538742	1	219668252	2.79687e-35	219268532	219798632	397	273	25	4	rs1531088;rs1538742;rs76926608;rs11118352
16	1:220970028:A:G	rs2642438	1	220970028	2.00501e-10	220970028	221197094	8	6	2	2	rs2642438;rs61819230
17	1:228076739:C:T	rs878811	1	228076739	4.53493e-10	228056868	228088833	11	9	1	1	rs878811
18	1:230299949:C:T	rs10779835	1	230299949	1.61711e-93	230231256	230436175	230	173	22	6	rs10864699;rs115047514;rs35498929;rs10779835;rs4846935;rs2273967
19	2:3642361:C:T	rs3820897	2	3642361	5.83221e-14	3632442	3648186	16	6	1	1	rs3820897
20	2:21237544:A:G	rs673548	2	21237544	4.71919e-103	20878719	21435616	380	269	30	5	rs12624282;rs36177368;rs17397826;rs673548;rs34468875
21	2:25512438:G:T	rs12999687	2	25512438	4.31623e-10	25510276	25584162	27	20	3	1	rs12999687
22	2:25986729:A:C	rs6753192	2	25986729	4.12227e-13	25901513	26106314	272	165	3	1	rs6753192
23	2:26929282:G:T	rs13394970	2	26929282	1.47877e-08	26911509	26932796	19	15	1	1	rs13394970
24	2:27730940:C:T	rs1260326	2	27730940	4.5069e-76	27189063	28560600	958	649	36	9	rs6714780;rs72808908;rs934986;rs1275525;rs115961201;rs1260326;rs2141371;rs898031;rs79468673
25	2:48962291:G:T	rs17326656	2	48962291	2.79844e-09	48962291	48996683	6	2	1	1	rs17326656
26	2:65287896:A:G	rs2249105	2	65287896	5.27638e-20	65235333	65386462	146	92	5	1	rs2249105
27	2:111873378:C:T	rs4627572	2	111873378	7.40371e-09	111863438	111941995	93	58	2	2	rs4627572;rs17041868
28	2:121308660:G:T	rs7578604	2	121308660	8.41347e-11	121306758	121449337	33	25	4	2	rs7578604;rs62167014
29	2:135268836:A:G	rs60802178	2	135268836	1.10179e-09	135240497	135280758	66	50	1	1	rs60802178
30	2:165528876:C:T	rs13389219	2	165528876	1.0083e-87	165315760	165828042	569	380	33	8	rs10930128;rs12476322;rs13389219;rs115631825;rs113238768;rs355849;rs2198571;rs10180709
31	2:171632225:C:T	rs17694506	2	171632225	3.32337e-08	171570488	171680587	116	84	1	1	rs17694506
32	2:219590348:A:G	rs148358468	2	219590348	1.33286e-15	219052546	219678421	747	508	9	3	rs6707559;rs2303566;rs148358468
33	2:220101974:A:G	rs61733623	2	220101974	2.65725e-10	220101974	220183796	2	1	1	1	rs61733623
34	2:227095159:C:T	rs2138161	2	227095159	1.48196e-109	226813090	227659583	873	583	39	11	rs6436586;rs34954697;rs72979712;rs1522802;rs114584605;rs55726223;rs2138161;rs115420636;rs71429196;rs77402945;rs12052364
35	3:12375956:C:T	rs2012444	3	12375956	7.89608e-39	12026207	12501943	512	353	21	4	rs305507;rs2347101;rs2012444;rs3103310
36	3:15692959:A:G	rs905555	3	15692959	5.17976e-10	15535910	15964140	357	229	4	1	rs905555
37	3:47914974:C:T	rs7638388	3	47914974	4.86738e-10	46925539	48322023	442	273	4	2	rs11711824;rs7638388
38	3:49884913:C:T	rs13316065	3	49884913	8.10717e-16	49296069	50209053	513	320	6	1	rs13316065
39	3:52501451:G:T	rs2159607	3	52501451	2.4239e-26	52213653	53174745	704	499	17	4	rs2159607;rs67409736;rs35333155;rs11713926
40	3:71643451:C:T	rs830663	3	71643451	3.51831e-08	71640776	71684845	48	37	1	1	rs830663
41	3:87037543:A:G	rs13066793	3	87037543	1.15282e-09	87037543	87037543	1	1	1	1	rs13066793
42	3:135926622:G:T	rs645040	3	135926622	2.84868e-25	135620045	136669079	878	567	14	2	rs36060212;rs645040
43	3:150074251:A:G	rs11929253	3	150074251	6.74453e-12	150018637	150239030	50	37	5	2	rs62271362;rs11929253
44	3:171800256:A:G	rs4894803	3	171800256	4.8894e-09	171759410	171833266	6	2	1	1	rs4894803
45	4:965720:A:G	rs13101828	4	965720	4.56989e-08	953193	983809	21	14	1	1	rs13101828
46	4:3443931:A:G	rs13108218	4	3443931	1.87002e-16	3281369	3536329	215	149	20	3	rs2051559;rs13108218;rs7676662
47	4:4990298:A:G	rs4450871	4	4990298	2.46931e-14	4990298	4990298	1	1	1	1	rs4450871
48	4:18030282:C:T	rs13136833	4	18030282	9.87641e-14	17785322	18049216	375	250	4	2	rs2074974;rs13136833
49	4:26065924:C:T	rs12513287	4	26065924	9.16613e-16	26006133	26128710	89	67	6	1	rs12513287
50	4:38659594:A:G	rs34722008	4	38659594	1.2852e-08	38577660	38716721	40	21	1	1	rs34722008
51	4:55521017:A:G	rs2159935	4	55521017	1.57648e-08	55487718	55539264	73	47	1	1	rs2159935
52	4:77411101:A:C	rs10029860	4	77411101	4.85103e-09	77362445	77414988	41	26	1	1	rs10029860
53	4:88005203:A:G	rs236996	4	88005203	1.76323e-26	87216986	88286354	755	493	28	4	rs13126378;rs7693889;rs17752307;rs236996
54	4:89741269:A:G	rs3822072	4	89741269	4.82136e-19	89619723	89985478	138	84	5	2	rs3822072;rs4425336
55	4:103146888:A:C	rs35225200	4	103146888	3.59958e-12	102702364	103387161	30	20	3	1	rs35225200
56	4:110569620:C:T	rs78025076	4	110569620	1.95489e-10	110465025	110569620	2	2	1	1	rs78025076
57	4:157683685:C:T	rs1425486	4	157683685	3.02709e-18	157611192	157814489	213	149	5	1	rs1425486
58	5:53272664:A:G	rs4865796	5	53272664	2.97855e-19	53271420	53344452	164	100	5	3	rs4865796;rs80138475;rs255761
59	5:55860781:A:G	rs3936511	5	55860781	5.1783e-66	55763382	56274146	468	327	37	10	rs12657780;rs40270;rs154256;rs71624136;rs3907158;rs456605;rs188010585;rs3936511;rs6450394;rs10039338
60	5:67714246:A:G	rs4976033	5	67714246	2.04394e-22	67673635	67715161	17	13	2	1	rs4976033
61	5:78468004:C:T	rs2121107	5	78468004	6.85861e-11	78416416	78628979	244	131	1	1	rs2121107
62	5:82815158:A:G	rs115912456	5	82815158	5.18922e-09	82810884	82815170	3	3	1	1	rs115912456
63	5:112388225:C:T	rs6594665	5	112388225	4.55161e-08	112379659	112395949	21	16	1	1	rs6594665
64	5:118728256:A:G	rs7720409	5	118728256	2.95727e-19	118676878	118789338	82	49	5	1	rs7720409
65	5:131320462:C:T	rs253942	5	131320462	1.04029e-09	130397106	131320462	49	27	2	1	rs253942
66	5:132444128:A:G	rs72801474	5	132444128	1.41612e-11	132349654	132467373	7	4	1	1	rs72801474
67	5:158029734:A:G	rs1650505	5	158029734	1.20375e-21	157881647	158058432	233	162	8	2	rs10036930;rs1650505
68	5:173353514:C:T	rs747472	5	173353514	1.07216e-09	173269956	173393823	88	72	1	1	rs747472
69	6:20502195:C:T	rs62398908	6	20502195	3.86732e-08	20483407	20522290	14	11	1	1	rs62398908
70	6:34192036:A:C	rs114760566	6	34192036	2.23959e-24	34067732	35383027	243	105	12	3	rs1592269;rs114760566;rs2820232
71	6:36634156:A:G	rs6930083	6	36634156	1.28047e-08	36629444	36648364	19	13	1	1	rs6930083
72	6:43757896:A:C	rs998584	6	43757896	1.10187e-81	43749110	43829941	123	86	14	4	rs10434;rs998584;rs10948097;rs1317983
73	6:55437238:C:T	rs73744635	6	55437238	3.87251e-09	55436342	55459912	11	9	1	1	rs73744635
74	6:107441753:A:G	rs11153046	6	107441753	9.50371e-09	107422239	107445266	19	12	1	1	rs11153046
75	6:109229880:A:G	rs2491086	6	109229880	1.91042e-11	109160380	109271201	95	66	1	1	rs2491086
76	6:127454893:A:G	rs72959041	6	127454893	3.17991e-27	126659043	127532807	523	337	10	4	rs9398803;rs987763;rs1936805;rs72959041
77	6:130354855:C:T	rs9388766	6	130354855	5.7299e-15	130321899	130460244	166	112	8	1	rs9388766
78	6:139831180:A:G	rs679582	6	139831180	3.77477e-40	139805476	139844673	98	63	10	2	rs3010285;rs679582
79	6:161092438:C:T	rs11751347	6	161092438	3.58702e-19	160514283	161125631	123	82	8	4	rs55730499;rs140570886;rs11751347;rs9457997
80	6:163740089:A:G	rs6927207	6	163740089	2.15739e-10	163736204	163745411	20	9	1	1	rs6927207
81	6:164126233:A:C	rs73013411	6	164126233	1.73217e-19	164092291	164133001	10	8	2	1	rs73013411
82	7:1006128:C:T	rs34082940	7	1006128	6.12417e-10	996645	1219553	79	49	5	1	rs34082940
83	7:15893576:C:T	rs38172	7	15893576	1.66387e-08	15883394	15899730	20	13	1	1	rs38172
84	7:17284577:C:T	rs4410790	7	17284577	6.15207e-12	17281007	17309279	13	10	1	1	rs4410790
85	7:17920613:C:T	rs10242866	7	17920613	2.29591e-15	17768277	18032241	388	254	10	1	rs10242866
86	7:25997536:A:G	rs4719841	7	25997536	2.70921e-20	25850464	26034676	231	163	11	4	rs2893221;rs7785415;rs4722551;rs4719841
87	7:26397239:A:C	rs1534696	7	26397239	4.6374e-16	26309246	26397239	64	42	3	1	rs1534696
88	7:28256240:A:G	rs498475	7	28256240	1.38958e-08	28142088	28256240	26	18	2	1	rs498475
89	7:73037366:A:G	rs55747707	7	73037366	1.31016e-120	72129667	73504110	643	409	31	8	rs147598130;rs113452856;rs117624871;rs799158;rs11760752;rs55747707;rs10246419;rs145743281
90	7:74118079:C:T	rs113667755	7	74118079	4.42495e-08	74002323	74325004	38	15	1	1	rs113667755
91	7:77417584:C:T	rs1544459	7	77417584	3.48406e-09	77305841	77606013	180	121	1	1	rs1544459
92	7:130438214:A:G	rs13234407	7	130438214	5.52813e-37	130422934	130468190	91	63	3	1	rs13234407
93	7:150216860:G:T	rs7783326	7	150216860	7.23114e-15	150179028	150542711	416	226	5	2	rs7783326;rs62492368
94	8:9173358:A:G	rs7012814	8	9173358	9.16696e-53	8088230	12199830	6331	4024	347	28	rs2945267;rs2976875;rs2980752;rs78533961;rs1814796;rs920974;rs330943;rs17149592;rs76448484;rs7012814;rs2169387;rs1551788;rs77705851;rs73204606;rs587059;rs7831557;rs56062414;rs11774792;rs9657541;rs79107778;rs78800805;rs73201420;rs7386288;rs66566471;rs34421088;rs8191515;rs28378644;rs146943626
95	8:12632903:G:T	rs4474021	8	12632903	8.76919e-14	12617857	12649168	21	13	1	1	rs4474021
96	8:18272881:A:G	rs1495741	8	18272881	1.43905e-17	18239697	18291590	74	54	2	1	rs1495741
97	8:19849992:C:T	rs73600084	8	19849992	2.32704e-196	18754390	20442964	1273	822	143	37	rs10085966;rs17091133;rs75466392;rs7835546;rs111251122;rs148339574;rs191147541;rs3899015;rs3758060;rs76769796;rs2119693;rs117860853;rs148383135;rs1866956;rs141522237;rs148048657;rs34761945;rs268;rs144578061;rs3289;rs80085105;rs142288236;rs73600084;rs117805502;rs75609851;rs2410630;rs73208819;rs4557718;rs34288216;rs73667496;rs28742908;rs77675968;rs16842;rs112089990;rs149611002;rs73210895;rs4922152
98	8:23609009:G:T	rs6983481	8	23609009	2.57846e-11	23572963	23617879	49	28	1	1	rs6983481
99	8:36846109:C:T	rs7816345	8	36846109	1.32919e-10	36658914	36859186	50	33	1	1	rs7816345
100	8:37399290:A:G	rs2407278	8	37399290	3.27083e-08	37389122	37405377	7	5	1	1	rs2407278
101	8:72469742:A:G	rs4738141	8	72469742	1.74252e-13	72395582	72531550	83	64	4	1	rs4738141
102	8:103873091:A:G	rs1991928	8	103873091	3.96595e-08	103816785	103926197	60	37	1	1	rs1991928
103	8:116639462:G:T	rs2737225	8	116639462	4.05242e-17	116464988	116700003	191	147	3	1	rs2737225
104	8:126479362:C:T	rs6982502	8	126479362	2.99557e-175	126419938	126650058	407	275	44	15	rs2980874;rs72647336;rs6982502;rs72655677;rs13271368;rs6470361;rs72657504;rs78309295;rs139768754;rs4006563;rs921719;rs1963945;rs10110589;rs139020749;rs13273592
105	9:1033958:C:T	rs1509195	9	1033958	8.71978e-16	1032567	1055533	36	27	4	2	rs1509195;rs1509202
106	9:16901067:A:C	rs62543565	9	16901067	1.20077e-11	16845726	16913836	58	37	2	1	rs62543565
107	9:86583076:C:T	rs696825	9	86583076	1.8639e-08	86368660	86661654	95	52	1	1	rs696825
108	9:95382297:C:T	rs12686780	9	95382297	9.97246e-12	94939154	95576781	201	141	3	1	rs12686780
109	9:107686823:A:G	rs10820747	9	107686823	1.19469e-08	107585213	107688297	10	6	2	2	rs7024300;rs10820747
110	9:117098650:C:T	rs1044531	9	117098650	6.90148e-13	117098650	117098650	1	1	1	1	rs1044531
111	9:119258187:C:T	rs767432	9	119258187	6.11448e-10	119245183	119258187	18	12	1	1	rs767432
112	10:65184717:C:T	rs10761762	10	65184717	3.75833e-30	64761091	65400352	888	548	15	1	rs10761762
113	10:77257791:G:T	rs4617527	10	77257791	3.83696e-08	77217080	77372699	64	45	1	1	rs4617527
114	10:89685643:C:T	rs10490920	10	89685643	4.55454e-12	89548270	89901708	102	72	6	2	rs10490920;rs7910126
115	10:94839724:G:T	rs4418728	10	94839724	2.9968e-19	94506628	95357918	312	209	16	4	rs2488068;rs4418728;rs1222925;rs113344423
116	10:99772190:C:T	rs565108	10	99772190	1.93726e-09	99694970	99784552	40	23	2	1	rs565108
117	10:113937941:G:T	rs2487294	10	113937941	3.55508e-19	113901194	114050642	195	123	6	2	rs2487294;rs60191209
118	10:115792787:A:G	rs740746	10	115792787	3.12741e-09	115789375	115805056	5	4	1	1	rs740746
119	10:122984826:C:T	rs11595340	10	122984826	8.44114e-10	122978944	123000638	33	25	1	1	rs11595340
120	11:10675738:A:G	rs10840457	11	10675738	1.76501e-11	10655623	10699750	31	24	1	1	rs10840457
121	11:13355770:C:T	rs6486121	11	13355770	4.98181e-11	13354509	13370535	13	10	1	1	rs6486121
122	11:14950889:C:T	rs117776155	11	14950889	4.01386e-09	14528011	15057986	3	2	1	1	rs117776155
123	11:26277412:C:T	rs17243231	11	26277412	9.6449e-09	26167547	26281664	40	22	1	1	rs17243231
124	11:47259668:C:T	rs326222	11	47259668	5.88682e-32	45766184	51581244	2499	1433	35	8	rs2593739;rs117847116;rs116969407;rs326222;rs11570051;rs138296701;rs3884997;rs11246574
125	11:61600342:A:C	rs174574	11	61600342	4.60125e-72	61531443	61678754	227	165	25	5	rs628993;rs174569;rs174574;rs916924;rs7394871
126	11:62328551:A:G	rs7943191	11	62328551	8.59897e-11	62309787	62418921	83	49	1	1	rs7943191
127	11:63882495:C:T	rs35927325	11	63882495	4.3026e-31	63843031	64318347	65	40	10	1	rs35927325
128	11:64803351:A:G	rs562590	11	64803351	1.98338e-17	64791585	64851305	48	35	1	1	rs562590
129	11:65473798:A:C	rs10750766	11	65473798	7.37819e-15	65351074	65566719	87	57	8	1	rs10750766
130	11:66066993:G:T	rs4930352	11	66066993	4.4733e-10	66064821	66182450	30	22	3	1	rs4930352
131	11:69305417:A:G	rs10796821	11	69305417	2.42044e-08	69285740	69307444	10	8	1	1	rs10796821
132	11:109979945:C:T	rs10789752	11	109979945	4.12711e-08	109959102	110016032	90	60	1	1	rs10789752
133	11:111458659:C:T	rs117869718	11	111458659	7.73828e-09	111347680	111952183	25	21	1	1	rs117869718
134	11:116623659:C:T	rs180327	11	116623659	1.87248e-185	116281630	117559653	2198	1456	165	42	rs12280893;rs17119701;rs1508102;rs883863;rs139118317;rs61362984;rs61904859;rs1944154;rs11216058;rs74948313;rs523549;rs481843;rs12417015;rs4938303;rs141414463;rs180327;rs193108398;rs17519079;rs1268353;rs113271699;rs3135507;rs75919952;rs61905132;rs75542613;rs71480323;rs7943309;rs77586292;rs141150227;rs140707095;rs4938341;rs2127905;rs186808413;rs493173;rs181009570;rs2509209;rs117117915;rs112357006;r…
135	11:118947154:C:T	rs1168570	11	118947154	6.06525e-12	118913993	118958869	54	31	1	1	rs1168570
136	12:371786:A:G	rs524468	12	371786	4.66201e-08	367902	518986	190	118	1	1	rs524468
137	12:4316171:A:G	rs75616205	12	4316171	4.66006e-09	4316171	4316171	1	1	1	1	rs75616205
138	12:6691452:A:G	rs7316626	12	6691452	8.576e-09	6663087	6739497	87	52	2	1	rs7316626
139	12:20470199:A:G	rs11045171	12	20470199	3.1498e-22	20392267	20592624	85	54	7	4	rs1373571;rs11045171;rs12369443;rs7134150
140	12:26463082:C:T	rs11048456	12	26463082	3.91951e-17	26281858	26532354	116	81	5	2	rs12809441;rs11048456
141	12:54425000:G:T	rs56270790	12	54425000	6.45168e-10	54417525	54445218	36	25	1	1	rs56270790
142	12:56456266:A:G	rs11171733	12	56456266	5.9816e-09	56368078	56584247	72	42	2	1	rs11171733
143	12:57219622:C:T	rs61937819	12	57219622	4.32917e-09	57116249	57233350	21	11	1	1	rs61937819
144	12:57809456:C:T	rs1106766	12	57809456	5.51761e-18	57558505	58233894	167	121	7	2	rs1106766;rs473465
145	12:65902265:C:T	rs145775785	12	65902265	1.56161e-09	65869436	65902265	2	2	1	1	rs145775785
146	12:66359752:A:C	rs8756	12	66359752	2.236e-13	66326943	66383320	25	18	2	1	rs8756
147	12:102898446:A:G	rs860598	12	102898446	6.08111e-09	102394872	102914640	201	146	3	2	rs5009837;rs860598
148	12:107205390:A:G	rs7977765	12	107205390	2.73316e-08	107156820	107290619	20	11	1	1	rs7977765
149	12:111932800:C:T	rs7137828	12	111932800	2.40463e-18	111708458	112906415	90	66	4	1	rs7137828
150	12:124409502:A:G	rs7133378	12	124409502	5.87266e-50	122282117	124812706	1879	1205	73	17	rs35892692;rs28643366;rs12369179;rs3104614;rs12313006;rs11060623;rs4759360;rs10773000;rs143928387;rs6488898;rs4930731;rs34934281;rs7133378;rs57818143;rs10773049;rs11057457;rs143786003
151	12:125265201:A:G	rs921919	12	125265201	2.29313e-13	125259562	125380232	49	33	7	3	rs921919;rs61941676;rs7298751
152	13:50648487:C:T	rs2066572	13	50648487	2.92855e-10	50468847	50729244	50	28	2	1	rs2066572
153	13:74146049:C:T	rs4885108	13	74146049	5.05944e-11	74104887	74196887	127	87	4	1	rs4885108
154	13:111038395:A:G	rs61963197	13	111038395	8.93804e-09	111015628	111043100	64	37	1	1	rs61963197
155	13:114599617:G:T	rs75073260	13	114599617	2.54943e-14	114541617	114840131	184	107	6	2	rs7140110;rs75073260
156	14:52480621:A:G	rs6572807	14	52480621	4.92956e-09	52480621	52497383	15	12	1	1	rs6572807
157	14:69142390:A:G	rs4902630	14	69142390	1.23724e-08	69138371	69148778	9	5	1	1	rs4902630
158	14:71521340:C:T	rs12896370	14	71521340	5.32581e-13	71350617	71613451	316	173	2	1	rs12896370
159	14:77518204:C:T	rs61991652	14	77518204	1.84942e-08	77497368	77529375	15	10	1	1	rs61991652
160	15:39444679:G:T	rs275184	15	39444679	1.28909e-12	39444679	39668870	33	28	2	2	rs275184;rs28790585
161	15:41888918:A:G	rs7170463	15	41888918	1.60114e-12	41851709	42145936	111	75	2	1	rs7170463
162	15:44027885:C:T	rs139974673	15	44027885	6.26158e-55	42438962	44947434	701	452	17	3	rs2412710;rs62020748;rs139974673
163	15:58678512:C:T	rs10468017	15	58678512	5.25254e-09	58671721	58683366	20	14	1	1	rs10468017
164	15:61957236:A:G	rs3848125	15	61957236	4.54066e-13	61913884	62000727	62	47	3	1	rs3848125
165	15:63403316:A:G	rs2729783	15	63403316	2.17342e-15	63340292	63432133	194	121	7	1	rs2729783
166	15:63792486:A:C	rs17184382	15	63792486	1.58007e-12	63781143	64173006	379	264	9	1	rs17184382
167	15:66884975:C:T	rs4776304	15	66884975	2.89898e-11	66861514	66884987	50	37	4	1	rs4776304
168	15:73618238:C:T	rs3826043	15	73618238	3.04927e-08	73431600	73627122	25	24	1	1	rs3826043
169	16:1252441:C:T	rs4984636	16	1252441	1.41986e-08	1244631	1255885	15	9	1	1	rs4984636
170	16:15148646:A:C	rs11075253	16	15148646	9.47952e-27	14475560	15642809	324	192	15	4	rs8048489;rs12926897;rs11075253;rs222135
171	16:30000901:A:G	rs3814881	16	30000901	1.13751e-09	29924422	30117253	112	74	1	1	rs3814881
172	16:57000938:A:G	rs118146573	16	57000938	5.08667e-173	56410722	57405159	573	412	86	29	rs1827210;rs75566930;rs4784724;rs77050717;rs189475016;rs62035923;rs13337205;rs148931404;rs13306676;rs72786761;rs193694;rs12444708;rs9938160;rs147464145;rs12923459;rs118146573;rs11076174;rs158477;rs289719;rs56208677;rs71387147;rs12708983;rs12720917;rs172337;rs7187261;rs185197208;rs289727;rs79546662;rs4784775
173	16:67972257:C:T	rs59600980	16	67972257	5.67322e-10	67677001	68409535	453	291	3	1	rs59600980
174	16:72108093:A:G	rs2000999	16	72108093	1.94696e-15	71582994	72741267	134	92	7	2	rs2000999;rs34417180
175	16:81534790:C:T	rs2925979	16	81534790	1.45671e-36	81509452	81549708	58	35	7	1	rs2925979
176	16:85150163:A:G	rs79311290	16	85150163	5.18126e-12	85150163	85157672	3	3	1	1	rs79311290
177	16:87995200:A:G	rs12934497	16	87995200	7.62713e-09	87984046	88117987	143	93	1	1	rs12934497
178	17:486821:A:C	rs12938449	17	486821	1.01709e-08	434610	617869	52	25	1	1	rs12938449
179	17:7557834:C:T	rs1642764	17	7557834	4.81744e-11	7438783	7615476	77	49	7	2	rs1642764;rs1794284
180	17:17660347:C:T	rs752579	17	17660347	3.54248e-15	17360050	18271522	615	411	14	4	rs1242503;rs11657678;rs752579;rs2461838
181	17:41926126:C:T	rs72836561	17	41926126	1.71253e-82	40571284	42005366	276	188	10	3	rs646123;rs72836561;rs231539
182	17:42330122:C:T	rs1476512	17	42330122	1.26222e-08	42330122	42339424	4	4	1	1	rs1476512
183	17:46197755:A:G	rs10775406	17	46197755	5.28673e-10	45949338	46463909	221	143	3	2	rs10775406;rs78077208
184	17:46957987:A:G	rs595767	17	46957987	4.67612e-08	46957696	47047868	163	94	1	1	rs595767
185	17:64224775:C:T	rs8178824	17	64224775	2.11058e-12	64195431	64305051	5	3	1	1	rs8178824
186	17:65887896:A:G	rs8079754	17	65887896	3.11539e-20	65764164	66098154	466	245	5	1	rs8079754
187	17:68453345:A:G	rs8066985	17	68453345	9.50057e-09	68416552	68511145	54	38	1	1	rs8066985
188	17:73374945:A:G	rs4789182	17	73374945	4.98356e-09	73249256	73408819	96	59	1	1	rs4789182
189	17:74211208:A:C	rs10512606	17	74211208	1.13368e-10	74206558	74303832	112	69	2	2	rs10512606;rs193220
190	17:76391454:G:T	rs4969179	17	76391454	3.50536e-13	76367182	76406402	86	58	2	1	rs4969179
191	18:248912:A:G	rs60205347	18	248912	7.15696e-09	56596	294745	162	77	2	2	rs60205347;rs8088001
192	18:2846499:C:T	rs3810068	18	2846499	6.20286e-09	2846499	2846812	2	1	1	1	rs3810068
193	18:19904144:C:T	rs9958656	18	19904144	6.16315e-11	19848836	19913064	83	61	1	1	rs9958656
194	18:21115060:A:G	rs6507716	18	21115060	4.39401e-08	21075441	21165409	77	54	1	1	rs6507716
195	18:47169989:C:T	rs1970696	18	47169989	6.04774e-15	47074869	47182664	62	42	5	2	rs2000813;rs1970696
196	18:56118358:C:T	rs41292412	18	56118358	8.57556e-09	56089858	56118358	2	2	1	1	rs41292412
197	18:60845884:C:T	rs12454712	18	60845884	1.61874e-16	60845884	60878883	34	27	2	1	rs12454712
198	19:7293119:C:T	rs8101064	19	7293119	4.51982e-14	7185576	7298592	98	65	7	3	rs12609995;rs3890483;rs8101064
199	19:7970635:A:G	rs4804833	19	7970635	4.83021e-18	7880469	7978430	73	48	7	2	rs3745383;rs4804833
200	19:8432737:C:T	rs117760119	19	8432737	3.83515e-28	8386998	8625196	254	154	18	6	rs4804298;rs62117487;rs117760119;rs2913973;rs3815783;rs73501545
201	19:18406228:A:G	rs111163930	19	18406228	1.39695e-09	18343185	18408519	113	75	3	1	rs111163930
202	19:19379549:C:T	rs58542926	19	19379549	3.00235e-31	19083483	19805771	407	294	14	2	rs58542926;rs187429064
203	19:33899065:A:G	rs731839	19	33899065	4.54871e-27	33784657	34025030	315	230	19	3	rs56361048;rs731839;rs11669387
204	19:35551428:A:C	rs58895965	19	35551428	4.56894e-10	35541248	35566151	41	28	2	2	rs58895965;rs897764
205	19:40753001:C:T	rs117090198	19	40753001	4.59914e-09	40409722	40753001	3	2	1	1	rs117090198
206	19:45416741:C:T	rs438811	19	45416741	4.79088e-99	45295886	45436657	141	90	32	12	rs112450640;rs28399635;rs41290120;rs11669338;rs79701229;rs117310449;rs1160984;rs405697;rs769446;rs438811;rs1064725;rs8106813
207	19:46178661:C:T	rs2238689	19	46178661	5.69486e-10	46147527	46419447	75	46	4	3	rs4802269;rs2238689;rs11672020
208	19:49259529:A:G	rs838133	19	49259529	5.32616e-15	49168942	49279227	134	96	6	2	rs838133;rs62132810
209	19:54793280:C:T	rs56883673	19	54793280	5.94047e-11	54752217	54809343	50	27	3	2	rs12975366;rs56883673
210	19:56102362:A:G	rs12610709	19	56102362	1.11442e-09	56077305	56119837	23	15	2	1	rs12610709
211	20:571467:A:C	rs144033177	20	571467	1.33424e-10	569164	571467	2	2	1	1	rs144033177
212	20:32657378:C:T	rs932388	20	32657378	3.2698e-09	32514061	33449739	463	284	2	1	rs932388
213	20:39227946:C:T	rs6102057	20	39227946	2.11305e-09	39143298	39234223	84	59	1	1	rs6102057
214	20:39924279:A:G	rs6102343	20	39924279	2.18358e-09	39660687	39971828	44	30	2	1	rs6102343
215	20:43042364:C:T	rs1800961	20	43042364	8.38276e-13	43042364	43042364	1	1	1	1	rs1800961
216	20:44551855:C:T	rs6073958	20	44551855	1.0802e-68	44027134	44792715	653	436	24	8	rs6032360;rs980984;rs148773337;rs6130969;rs6073958;rs3746503;rs12373874;rs6065921
217	20:45597546:C:T	rs6066141	20	45597546	2.25315e-17	45487607	45606853	81	56	6	2	rs4809604;rs6066141
218	20:55836040:A:G	rs6123685	20	55836040	4.42567e-12	55836040	55836040	1	1	1	1	rs6123685
219	20:56113783:A:G	rs7274718	20	56113783	6.03831e-09	56108386	56137834	45	32	2	1	rs7274718
220	22:38599978:A:G	rs4820325	22	38599978	1.89222e-25	38505347	39152412	591	398	12	3	rs4820325;rs75787797;rs138430
Abbreviations: GWAS, genome-wide association study; IR, insulin resistance; MTAG, multi-trait analysis of genome-wide association study; SNP, single nucleotide polymorphism.

## Sheet: ST4
Supplementary Table 4. Independent genome-wide significant signals associated with mvIR_CPASSOC
GenomicLocus	uniqID	rsID	Chromosome	Position	P value	start	end	N SNPs	N GWAS SNPs	N Ind Sig SNPs	N Lead SNPs	Lead SNPs
1	1:1875859:A:G	rs2803337	1	1875859	1.29925e-11	1658343	1883503	205	119	3	1	rs2803337
2	1:2229447:A:G	rs2643888	1	2229447	4.50237e-09	2222560	2240006	16	14	1	1	rs2643888
3	1:2983318:C:T	rs2788091	1	2983318	8.12356e-09	2936386	2983318	112	89	1	1	rs2788091
4	1:9334993:A:G	rs57533288	1	9334993	3.09061e-09	9325676	9336748	15	12	1	1	rs57533288
5	1:11433250:C:T	rs66791975	1	11433250	1.51397e-08	11111976	11433250	213	157	2	2	rs2295079;rs66791975
6	1:15829457:C:G	rs4661637	1	15829457	6.14992e-12	15803338	16046109	162	111	3	1	rs4661637
7	1:17941832:C:T	rs41268771	1	17941832	7.50627e-14	17941832	17941832	1	1	1	1	rs41268771
8	1:24878349:C:T	rs147085373	1	24878349	1.2185e-25	23952365	25849174	30	11	2	2	rs60379440;rs147085373
9	1:27021913:C:G	rs114165349	1	27021913	7.54997e-63	26805169	27860948	287	222	10	2	rs114165349;rs11581460
10	1:29576784:A:C	rs6670211	1	29576784	2.93906e-08	29367659	29576784	26	19	1	1	rs6670211
11	1:40035928:G:T	rs3768321	1	40035928	4.38766e-55	39310639	40720588	714	552	37	8	rs189965467;rs3954096;rs111452793;rs3768321;rs72665235;rs141982114;rs61781290;rs60976597
12	1:50852249:A:G	rs2784135	1	50852249	6.46456e-16	50828316	52061445	757	608	6	2	rs2784135;rs72904737
13	1:54877103:C:T	rs213494	1	54877103	4.54084e-11	54839533	54925455	84	58	4	1	rs213494
14	1:61670759:A:G	rs74328314	1	61670759	9.90406e-09	61670582	61721857	56	46	1	1	rs74328314
15	1:62957030:A:G	rs10889333	1	62957030	4.75454e-149	62637994	63399692	757	567	32	12	rs138832098;rs79801475;rs72929768;rs10889333;rs116423924;rs61775912;rs79152165;rs17388017;rs12031537;rs72669514;rs12122434;rs12564421
16	1:71413498:A:G	rs500647	1	71413498	6.48902e-13	71397835	71817309	68	52	6	2	rs500647;rs479934
17	1:72752939:C:T	rs2613498	1	72752939	1.80043e-11	72628347	72949290	152	80	1	1	rs2613498
18	1:93836218:A:C	rs698927	1	93836218	2.03912e-26	93539383	94016011	524	393	13	2	rs10874763;rs698927
19	1:98487510:A:C	rs5005705	1	98487510	7.07254e-13	98298371	98562260	279	240	4	1	rs5005705
20	1:109818530:C:T	rs646776	1	109818530	3.16588e-25	109594605	109974292	75	56	7	3	rs28663119;rs151293865;rs646776
21	1:110470764:A:G	rs333947	1	110470764	6.25891e-19	110455305	110504663	49	42	7	2	rs333947;rs390923
22	1:149871905:C:G	rs1044808	1	149871905	5.07871e-21	149727956	151233488	1229	889	24	7	rs146356417;rs1355237;rs1044808;rs973374;rs8444;rs150241855;rs77018356
23	1:154251626:A:G	rs12750321	1	154251626	8.52933e-19	153756191	154270018	419	299	7	2	rs111689685;rs12750321
24	1:162785474:A:G	rs193008005	1	162785474	1.82414e-10	162785474	162785474	1	1	1	1	rs193008005
25	1:168510925:C:T	rs187744852	1	168510925	6.46294e-09	167703751	169292807	16	1	1	1	rs187744852
26	1:172355276:A:G	rs9425589	1	172355276	1.20864e-18	172302544	172454826	158	130	7	1	rs9425589
27	1:178508930:A:G	rs6700266	1	178508930	1.73667e-14	178473105	178631012	209	168	3	1	rs6700266
28	1:182143934:G:T	rs1779799	1	182143934	9.0865e-11	182048703	182171957	48	37	3	2	rs1779799;rs1689788
29	1:184463313:A:G	rs183490620	1	184463313	4.51148e-18	182927685	185346242	347	271	6	2	rs10797857;rs183490620
30	1:198592814:A:C	rs16843497	1	198592814	3.8676e-08	198549674	198639132	5	4	1	1	rs16843497
31	1:200019951:C:T	rs7518406	1	200019951	5.47187e-09	200011818	200021261	6	5	1	1	rs7518406
32	1:201845575:A:C	rs8024	1	201845575	4.64758e-11	201787940	201887457	56	44	1	1	rs8024
33	1:205041542:C:T	rs3903399	1	205041542	1.15831e-14	203498514	205271137	248	190	11	4	rs2821231;rs192792667;rs3903399;rs9659978
34	1:210556951:A:G	rs12093502	1	210556951	7.82174e-09	210488013	210577901	32	24	1	1	rs12093502
35	1:214147889:C:T	rs7529073	1	214147889	7.45246e-09	214144858	214163973	25	16	1	1	rs7529073
36	1:219668252:A:C	rs1538742	1	219668252	6.53138e-42	219059052	220005472	406	332	30	5	rs596588;rs2605090;rs1538742;rs76926608;rs11118352
37	1:220970028:A:G	rs2642438	1	220970028	5.65055e-24	220693476	221357227	188	142	22	6	rs115316355;rs72470577;rs2642438;rs11118610;rs2247213;rs61819230
38	1:228078132:A:G	rs68160490	1	228078132	1.78956e-14	228056868	228101808	32	26	3	1	rs68160490
39	1:230299949:C:T	rs10779835	1	230299949	5.52494e-254	229983791	230870604	563	474	63	16	rs6684677;rs56292648;rs10864699;rs115047514;rs34351083;rs4846911;rs143742530;rs10779835;rs73111933;rs12127595;rs6541303;rs3213495;rs16851339;rs11122486;rs75571736;rs16851934
40	1:232424931:C:T	rs182694329	1	232424931	1.69509e-14	231805428	233359974	15	1	1	1	rs182694329
41	1:246744306:G:T	rs183715185	1	246744306	4.06236e-08	246744306	246894150	2	1	1	1	rs183715185
42	2:254215:A:G	rs17713879	2	254215	9.93286e-11	211317	305203	59	44	1	1	rs17713879
43	2:630995:G:T	rs5017303	2	630995	1.68307e-08	600575	653874	236	184	1	1	rs5017303
44	2:3642361:C:T	rs3820897	2	3642361	3.39522e-26	3632442	3648757	21	9	2	2	rs3820897;rs6739899
45	2:6160927:C:T	rs113532697	2	6160927	1.57411e-08	6146154	6161212	15	12	1	1	rs113532697
46	2:15210677:C:T	rs180775519	2	15210677	1.41865e-33	14509687	16014943	13	1	1	1	rs180775519
47	2:18707873:A:G	rs11096542	2	18707873	3.49703e-08	18701627	18729244	11	9	1	1	rs11096542
48	2:21237544:A:G	rs673548	2	21237544	1.62062e-278	20300246	22242325	813	638	84	22	rs548782;rs80298967;rs4971534;rs62123892;rs13022310;rs10187878;rs76233241;rs9306897;rs10175646;rs36177368;rs17393586;rs141644795;rs1799812;rs673548;rs12714221;rs192275397;rs12720766;rs12720788;rs71435595;rs72782181;rs34468875;rs733760
49	2:25592918:C:T	rs11903847	2	25592918	5.14768e-10	25510276	25592956	44	34	5	2	rs71439172;rs11903847
50	2:27748624:A:G	rs1260333	2	27748624	0	25901513	28764678	2194	1694	183	47	rs13394970;rs34165519;rs12467466;rs11675278;rs12617848;rs76036286;rs75017471;rs190229273;rs72808941;rs188176126;rs7588926;rs2384574;rs1275504;rs114163473;rs13390228;rs114561490;rs111925401;rs75662315;rs114439706;rs75743860;rs139676599;rs143060452;rs113271819;rs115961201;rs79585700;rs8179219;rs141428740;rs1260333;rs79111922;rs184565252;rs4468776;rs192325752;rs144176364;rs2141371;rs77189911;rs56242…
51	2:37075013:A:T	rs1861435	2	37075013	7.34686e-12	37047651	37264413	112	89	5	3	rs2110882;rs1861435;rs9636389
52	2:40330267:C:G	rs143492985	2	40330267	4.18675e-08	40257273	40330267	2	2	1	1	rs143492985
53	2:42575870:A:T	rs6726108	2	42575870	7.01535e-12	42372279	42741914	253	195	4	1	rs6726108
54	2:43490619:A:T	rs58839393	2	43490619	4.20186e-10	43455654	43843950	59	46	2	1	rs58839393
55	2:48962291:G:T	rs17326656	2	48962291	1.94828e-20	47123403	49003623	92	54	9	3	rs143462531;rs11897846;rs17326656
56	2:50691898:A:T	rs1520456	2	50691898	5.85223e-11	50689260	50755067	116	95	5	1	rs1520456
57	2:55630107:C:T	rs192690328	2	55630107	9.82323e-13	54670942	56496705	19	1	1	1	rs192690328
58	2:59330227:A:G	rs6739755	2	59330227	2.40455e-10	59294558	59335104	29	22	1	1	rs6739755
59	2:61352330:C:T	rs139575835	2	61352330	1.031e-08	61035162	61848131	9	9	1	1	rs139575835
60	2:65296280:C:T	rs2252867	2	65296280	1.01104e-28	65235333	65386462	233	179	9	1	rs2252867
61	2:65701757:A:C	rs840967	2	65701757	3.42347e-09	65674398	65713903	10	7	1	1	rs840967
62	2:66677881:G:T	rs1519103	2	66677881	1.09675e-08	66652955	66680892	25	20	1	1	rs1519103
63	2:67916545:A:C	rs183287715	2	67916545	7.51322e-21	67640656	68888167	7	1	1	1	rs183287715
64	2:78307376:C:T	rs144602036	2	78307376	3.33698e-08	78307376	78336967	2	1	1	1	rs144602036
65	2:85788270:A:C	rs10172544	2	85788270	8.7369e-11	85737362	85979012	172	129	5	2	rs10172544;rs151009279
66	2:101631496:A:G	rs4851395	2	101631496	3.3289e-08	101609827	101665915	19	13	1	1	rs4851395
67	2:111927379:A:G	rs6708784	2	111927379	4.89826e-13	111861838	112024305	124	92	3	2	rs17041868;rs6708784
68	2:121347612:C:G	rs11688682	2	121347612	8.46086e-18	121304548	121449337	62	57	8	3	rs7578604;rs11688682;rs10864859
69	2:124017826:A:G	rs9308643	2	124017826	6.72412e-09	123920419	124106720	4	2	1	1	rs9308643
70	2:127725237:A:T	rs146957107	2	127725237	1.63757e-14	126829209	128680913	18	1	1	1	rs146957107
71	2:135268836:A:G	rs60802178	2	135268836	1.62886e-14	135239166	135437405	109	98	4	2	rs60802178;rs4440018
72	2:136616754:C:T	rs182549	2	136616754	2.84211e-10	135760244	136822267	272	180	3	1	rs182549
73	2:147806204:C:T	rs2598503	2	147806204	1.72023e-08	147806204	147897358	70	54	1	1	rs2598503
74	2:158525226:C:T	rs12694933	2	158525226	1.1751e-11	158522265	158531114	13	10	2	1	rs12694933
75	2:165528876:C:T	rs13389219	2	165528876	3.62942e-131	165235662	165828042	656	506	48	14	rs4667462;rs141360938;rs62173895;rs79663649;rs184776663;rs13389219;rs76383094;rs77669945;rs115631825;rs3820981;rs112913451;rs113238768;rs10930140;rs10180709
76	2:169523666:A:T	rs16823012	2	169523666	3.18057e-08	169521385	169523666	4	4	1	1	rs16823012
77	2:171629063:C:G	rs12472667	2	171629063	9.6522e-13	171342637	171680587	138	117	2	2	rs2083212;rs12472667
78	2:176425654:C:T	rs17198460	2	176425654	8.88064e-09	176313254	176439632	91	76	1	1	rs17198460
79	2:179017607:G:T	rs191494993	2	179017607	6.74906e-10	178579149	179618640	66	42	3	2	rs334074;rs191494993
80	2:180762321:C:T	rs183413843	2	180762321	1.40791e-14	180762321	180762321	1	1	1	1	rs183413843
81	2:181705528:A:G	rs113633586	2	181705528	3.84299e-13	181705528	181785401	2	2	1	1	rs113633586
82	2:188165166:A:G	rs17705966	2	188165166	6.6304e-10	188003118	188381367	293	216	2	1	rs17705966
83	2:193156734:C:T	rs181756070	2	193156734	3.01339e-11	193111479	193309703	3	2	2	2	rs181756070;rs146577321
84	2:195642552:C:T	rs72919871	2	195642552	2.49016e-08	195642552	195642552	1	1	1	1	rs72919871
85	2:201678354:C:G	rs187774460	2	201678354	2.31009e-11	200916707	202379921	153	96	2	2	rs187774460;rs2080325
86	2:203431804:A:G	rs3731696	2	203431804	9.98275e-11	202968809	203450887	222	171	1	1	rs3731696
87	2:205375909:A:C	rs4482463	2	205375909	3.73418e-09	205362820	205492910	46	38	2	1	rs4482463
88	2:208440724:A:T	rs2551644	2	208440724	4.25446e-10	208371637	208531683	117	86	2	1	rs2551644
89	2:215377588:A:T	rs4416211	2	215377588	2.68292e-08	215249419	215406636	118	87	2	1	rs4416211
90	2:217749857:C:T	rs140044504	2	217749857	3.85369e-14	217749857	217802947	4	2	1	1	rs140044504
91	2:219590348:A:G	rs148358468	2	219590348	1.72783e-24	218934709	220183796	787	612	26	12	rs6707559;rs116658512;rs7572745;rs191676831;rs141155582;rs148358468;rs6741592;rs10197074;rs148224341;rs113137476;rs62191851;rs79047930
92	2:222316575:G:T	rs2052942	2	222316575	3.4674e-08	222301357	222339657	27	21	1	1	rs2052942
93	2:227099534:A:G	rs2943646	2	227099534	2.53583e-146	226813090	227659583	912	706	48	16	rs115519115;rs11895712;rs62188999;rs34954697;rs17231538;rs1851521;rs72979712;rs1522802;rs150105548;rs114584605;rs55726223;rs2943646;rs71429196;rs77402945;rs6741075;rs76490719
94	2:228998742:A:G	rs72967047	2	228998742	5.33093e-09	228998742	229021719	11	11	1	1	rs72967047
95	2:230128204:G:T	rs7596814	2	230128204	2.41599e-11	230117634	230149762	28	22	1	1	rs7596814
96	2:242237902:C:T	rs59104589	2	242237902	5.62567e-15	242162191	242461666	62	43	5	1	rs59104589
97	3:4763301:A:G	rs9812100	3	4763301	2.32035e-11	4753712	5032236	23	18	2	2	rs9812100;rs1467159
98	3:12379351:A:G	rs35240997	3	12379351	3.1019e-41	12026207	12741345	626	505	26	11	rs305507;rs74956164;rs2347100;rs35240997;rs150535373;rs142397996;rs1152001;rs3103310;rs13091092;rs74399066;rs796172
99	3:15846011:C:T	rs13097947	3	15846011	2.13225e-16	15538477	15973651	440	335	7	1	rs13097947
100	3:24302811:A:G	rs113967141	3	24302811	2.17752e-10	24286322	24520283	20	19	2	2	rs113967141;rs6792725
101	3:26062555:A:T	rs181956139	3	26062555	2.48454e-13	26062555	26062555	1	1	1	1	rs181956139
102	3:37025661:C:T	rs9831084	3	37025661	3.78218e-10	36859705	37326663	355	274	3	1	rs9831084
103	3:46925539:C:T	rs11926707	3	46925539	1.67107e-11	46742749	48405661	450	323	5	3	rs7429588;rs11926707;rs62260788
104	3:49884261:C:T	rs9819511	3	49884261	1.70114e-16	49669948	50250837	419	293	7	2	rs9819511;rs1317571
105	3:52501451:G:T	rs2159607	3	52501451	3.67473e-46	51306345	53174745	1126	924	24	9	rs76005311;rs34135146;rs57172722;rs73072980;rs2159607;rs67409736;rs13065744;rs2581799;rs11713926
106	3:65961959:C:T	rs13098504	3	65961959	3.25991e-08	65902563	65965134	34	25	1	1	rs13098504
107	3:66874481:A:C	rs12486424	3	66874481	2.7519e-09	66853353	66903172	24	19	1	1	rs12486424
108	3:69879323:A:G	rs6805563	3	69879323	2.95678e-09	69792011	69904872	100	86	1	1	rs6805563
109	3:71643451:C:T	rs830663	3	71643451	2.81966e-13	71024222	72745054	174	142	7	4	rs830663;rs112427872;rs112299262;rs138414535
110	3:81971856:C:T	rs6797240	3	81971856	2.68043e-10	81698481	82022078	120	94	2	1	rs6797240
111	3:85600677:A:G	rs11925844	3	85600677	1.24822e-08	85433248	85791383	131	99	1	1	rs11925844
112	3:87037543:A:G	rs13066793	3	87037543	1.06613e-10	87037543	87037543	1	1	1	1	rs13066793
113	3:90496660:G:T	rs149537696	3	90496660	9.94433e-14	89707295	90496660	5	3	1	1	rs149537696
114	3:94120783:C:G	rs7609621	3	94120783	5.93652e-10	93883640	94198182	220	185	2	1	rs7609621
115	3:123070517:C:T	rs7613951	3	123070517	4.0355e-10	123051019	123131254	24	21	1	1	rs7613951
116	3:127306462:C:T	rs79983121	3	127306462	3.20258e-13	127215535	127410033	42	33	1	1	rs79983121
117	3:128293608:A:C	rs185792437	3	128293608	1.75275e-08	128293608	128293608	1	1	1	1	rs185792437
118	3:129307646:C:T	rs2811456	3	129307646	2.66438e-09	129299265	129341403	65	57	2	1	rs2811456
119	3:131646087:C:T	rs1225049	3	131646087	3.65272e-09	131447660	131647794	182	134	1	1	rs1225049
120	3:135956305:A:C	rs684773	3	135956305	1.7543e-50	135537393	137198063	1160	879	23	3	rs36060212;rs684773;rs34011764
121	3:142658030:C:G	rs9852373	3	142658030	6.40326e-12	142640398	142670467	50	41	2	1	rs9852373
122	3:150066540:A:T	rs62271373	3	150066540	1.38739e-42	150018637	150331124	69	63	14	2	rs73162462;rs62271373
123	3:155511492:A:G	rs71310444	3	155511492	2.85285e-08	155511492	155511492	1	1	1	1	rs71310444
124	3:156797648:C:T	rs10049088	3	156797648	8.58605e-30	156791268	156813672	20	17	2	1	rs10049088
125	3:170727739:A:T	rs5402	3	170727739	7.04577e-12	170572112	170755713	144	107	2	1	rs5402
126	3:171576436:C:T	rs35240776	3	171576436	9.98258e-10	171565463	171833266	44	40	2	2	rs35240776;rs9647379
127	3:172294500:A:G	rs79287178	3	172294500	2.14632e-19	172231610	172294500	62	54	6	3	rs17535790;rs9809402;rs79287178
128	3:179846007:C:T	rs189450573	3	179846007	1.03488e-08	179500179	179846007	2	2	1	1	rs189450573
129	3:180371905:C:T	rs192742312	3	180371905	3.41327e-09	180371905	180371905	1	1	1	1	rs192742312
130	3:187628006:G:T	rs7631606	3	187628006	8.81368e-13	187519402	187628472	23	14	4	1	rs7631606
131	3:188462224:A:G	rs16863574	3	188462224	4.15314e-12	188415807	188472383	19	15	2	1	rs16863574
132	3:194135256:A:C	rs35740053	3	194135256	4.79314e-08	194109840	194204318	52	40	1	1	rs35740053
133	3:196187608:A:G	rs2342371	3	196187608	1.90446e-13	195954069	196233136	279	189	6	1	rs2342371
134	4:965720:A:G	rs13101828	4	965720	6.57142e-13	848335	984870	74	59	6	1	rs13101828
135	4:3443931:A:G	rs13108218	4	3443931	3.01254e-27	3015553	3536329	485	396	40	5	rs363064;rs6851060;rs13108218;rs1203109;rs731450
136	4:4990298:A:G	rs4450871	4	4990298	1.26388e-18	4990298	4990298	1	1	1	1	rs4450871
137	4:9427281:G:T	rs56923184	4	9427281	3.38738e-09	9157448	9547599	28	6	1	1	rs56923184
138	4:15100472:A:C	rs6819236	4	15100472	6.8603e-09	14956689	15135139	97	72	1	1	rs6819236
139	4:18030282:C:T	rs13136833	4	18030282	1.91026e-24	17785322	18111537	383	298	7	3	rs2074974;rs13136833;rs6812794
140	4:20331434:C:G	rs191985078	4	20331434	6.16952e-09	20331434	20451968	3	1	1	1	rs191985078
141	4:26062990:A:G	rs10019888	4	26062990	2.66468e-42	25986964	26441638	218	179	18	3	rs1567650;rs10019888;rs4692523
142	4:33706564:C:T	rs73222424	4	33706564	1.5164e-12	33706564	33706564	1	1	1	1	rs73222424
143	4:38650464:C:T	rs6827414	4	38650464	4.83869e-10	38577660	38716721	41	27	2	1	rs6827414
144	4:39700173:C:T	rs1055582	4	39700173	6.14382e-15	39641262	39788949	64	46	3	1	rs1055582
145	4:55025298:C:T	rs115386523	4	55025298	1.39632e-08	54962931	55089870	5	3	1	1	rs115386523
146	4:55521017:A:G	rs2159935	4	55521017	4.81596e-19	55484718	55580596	164	135	8	1	rs2159935
147	4:56212404:C:G	rs188248575	4	56212404	4.21834e-08	56206338	56390567	10	6	1	1	rs188248575
148	4:65324123:A:G	rs181085276	4	65324123	7.26412e-10	65324123	65539617	7	3	1	1	rs181085276
149	4:77396854:C:G	rs11722924	4	77396854	3.48809e-15	77183300	77439236	159	130	6	1	rs11722924
150	4:86931091:C:T	rs7439032	4	86931091	4.02939e-10	86931091	86931091	1	1	1	1	rs7439032
151	4:87976359:A:T	rs1471251	4	87976359	1.66636e-76	87216986	88704675	1509	1107	73	11	rs6813724;rs116386357;rs2705616;rs150710017;rs1471251;rs7440770;rs17702997;rs11727803;rs71607415;rs6845839;rs28555542
152	4:89741269:A:G	rs3822072	4	89741269	5.15182e-21	89615174	89796154	147	116	6	3	rs3775403;rs3822072;rs4425336
153	4:100054827:C:T	rs6532798	4	100054827	5.66013e-18	99783143	100136372	668	473	11	1	rs6532798
154	4:103198082:A:G	rs13135092	4	103198082	1.2157e-46	102329827	103388441	334	260	20	4	rs79441312;rs13136118;rs13135092;rs7654606
155	4:103919065:A:C	rs9994654	4	103919065	1.96727e-10	103640758	104378012	237	163	2	1	rs9994654
156	4:106081636:C:T	rs9884482	4	106081636	1.90015e-10	106071064	106106709	12	10	1	1	rs9884482
157	4:108833259:A:G	rs112408998	4	108833259	1.62274e-10	108833259	108973450	3	1	1	1	rs112408998
158	4:110578226:A:T	rs189866430	4	110578226	7.41184e-41	109850931	110987437	57	48	8	3	rs184408126;rs112089516;rs189866430
159	4:120215836:A:C	rs2175383	4	120215836	7.52916e-09	120056815	120522934	94	58	1	1	rs2175383
160	4:124263310:A:C	rs114236092	4	124263310	8.61592e-09	123782545	124286340	143	112	1	1	rs114236092
161	4:124766331:A:G	rs3097903	4	124766331	4.27312e-10	124571414	125384324	207	158	4	2	rs192929239;rs3097903
162	4:140874760:A:G	rs809955	4	140874760	6.832e-09	140856533	140948095	77	60	1	1	rs809955
163	4:148987187:A:G	rs12650033	4	148987187	7.0592e-09	148979174	148988399	19	16	1	1	rs12650033
164	4:155444125:C:T	rs76903237	4	155444125	4.45887e-09	155432943	155489608	26	22	2	2	rs76903237;rs6054
165	4:157704459:A:G	rs4691378	4	157704459	4.99172e-18	157611192	157815950	218	172	6	1	rs4691378
166	4:160504814:A:G	rs111686089	4	160504814	2.90165e-08	160504814	160504814	1	1	1	1	rs111686089
167	4:171933899:C:G	rs185844156	4	171933899	1.86393e-10	171465345	172020990	3	1	1	1	rs185844156
168	4:172349379:C:T	rs114251000	4	172349379	4.80539e-08	172312114	172349379	2	1	1	1	rs114251000
169	5:2198638:C:T	rs552956613	5	2198638	3.46515e-08	2185734	2250240	5	4	1	1	rs552956613
170	5:37783146:A:G	rs114957850	5	37783146	3.64979e-10	37758563	37861158	9	7	2	1	rs114957850
171	5:40828478:C:T	rs389737	5	40828478	1.5772e-09	40684676	40839228	104	77	1	1	rs389737
172	5:42691983:A:G	rs144166885	5	42691983	4.98382e-08	42691983	42691983	1	1	1	1	rs144166885
173	5:53300662:A:G	rs4311394	5	53300662	3.25396e-17	53263428	53503097	195	145	6	1	rs4311394
174	5:55860781:A:G	rs3936511	5	55860781	1.27211e-109	55375172	56919954	556	442	52	19	rs12657780;rs11738745;rs29999;rs40270;rs12516167;rs11951908;rs6896054;rs39583;rs39837;rs71624136;rs3907158;rs456605;rs188010585;rs3936511;rs66485956;rs6450394;rs185219247;rs34196215;rs832537
175	5:57610069:C:G	rs37538	5	57610069	1.74387e-09	57527886	57647762	23	20	1	1	rs37538
176	5:59391636:C:T	rs12516070	5	59391636	1.60707e-10	59307118	59677842	108	78	2	2	rs12516070;rs12188899
177	5:67714246:A:G	rs4976033	5	67714246	7.22436e-26	67673635	67729637	32	27	4	1	rs4976033
178	5:70917725:A:G	rs181550663	5	70917725	1.35318e-10	70822033	70917725	2	1	1	1	rs181550663
179	5:74289267:C:T	rs6887521	5	74289267	2.62422e-09	74245512	74559534	107	82	3	1	rs6887521
180	5:75010002:C:T	rs6864091	5	75010002	3.90439e-08	74952861	75038901	40	30	1	1	rs6864091
181	5:78436189:A:G	rs1915705	5	78436189	1.78462e-15	78416416	78629346	253	168	4	1	rs1915705
182	5:81569672:A:G	rs55951719	5	81569672	5.65792e-10	81235582	81689066	111	85	2	1	rs55951719
183	5:82815158:A:G	rs115912456	5	82815158	9.23524e-14	82810884	82857040	12	12	4	2	rs115912456;rs309587
184	5:112466903:A:C	rs1443689	5	112466903	1.48166e-09	112308600	112504458	159	130	5	2	rs4428399;rs1443689
185	5:115358426:C:G	rs112874906	5	115358426	9.9285e-15	115330729	115745913	6	2	1	1	rs112874906
186	5:117132086:C:T	rs12655842	5	117132086	3.41238e-09	117132086	117132086	1	1	1	1	rs12655842
187	5:118729286:C:T	rs1045241	5	118729286	5.38252e-30	118650964	119032708	276	223	11	3	rs1045241;rs257983;rs150566898
188	5:131320462:C:T	rs253942	5	131320462	1.99782e-14	128512785	131704047	72	45	7	3	rs147126505;rs253942;rs3900685
189	5:132444128:A:G	rs72801474	5	132444128	3.24578e-17	132349654	132467373	132	98	4	2	rs9327640;rs72801474
190	5:134421360:C:T	rs254579	5	134421360	4.29079e-08	134421360	134421665	2	2	1	1	rs254579
191	5:140098596:G:T	rs12188417	5	140098596	1.64755e-10	139719983	140142174	130	94	2	1	rs12188417
192	5:140888248:C:T	rs970069	5	140888248	7.64985e-11	140761777	141017339	58	41	1	1	rs970069
193	5:144501147:C:T	rs76957426	5	144501147	4.21205e-10	144460452	144602295	59	47	1	1	rs76957426
194	5:145570691:A:G	rs75793060	5	145570691	4.24345e-08	145570691	145638866	2	2	1	1	rs75793060
195	5:148098444:G:T	rs62387983	5	148098444	3.12621e-08	148026299	148116306	71	54	1	1	rs62387983
196	5:149191111:C:T	rs4235745	5	149191111	5.95424e-09	149191111	149441016	70	53	2	2	rs4235745;rs245051
197	5:153800513:A:G	rs7244	5	153800513	6.10045e-11	153055075	153810063	138	118	3	3	rs1461226;rs890793;rs7244
198	5:156390297:C:T	rs6882076	5	156390297	1.19267e-26	155464063	157272646	794	477	12	3	rs111394708;rs6882076;rs72805148
199	5:157989980:C:T	rs2914221	5	157989980	1.75574e-31	157831465	158439165	334	274	14	4	rs10036930;rs181958996;rs2914221;rs116640818
200	5:159632043:A:G	rs72643442	5	159632043	3.37182e-09	159601688	159655121	39	38	1	1	rs72643442
201	5:164821981:A:T	rs1644388	5	164821981	2.71055e-08	164797846	164845627	26	18	1	1	rs1644388
202	5:166729167:A:G	rs113821041	5	166729167	4.17697e-09	166709809	166729167	2	2	1	1	rs113821041
203	5:167865998:C:T	rs12055261	5	167865998	7.38429e-09	167845348	167868431	11	10	1	1	rs12055261
204	5:173324971:G:T	rs55646464	5	173324971	4.87146e-11	173269956	173393823	88	78	1	1	rs55646464
205	5:176630984:C:T	rs7721671	5	176630984	6.8004e-11	176525029	176775851	46	38	3	2	rs7721671;rs11952102
206	6:1613686:A:G	rs2745599	6	1613686	1.12744e-10	1613686	1620627	7	5	1	1	rs2745599
207	6:2791683:A:G	rs178399	6	2791683	5.86563e-09	2784353	2793939	9	7	1	1	rs178399
208	6:5399454:C:T	rs192617776	6	5399454	1.10757e-11	4627654	6347316	18	1	1	1	rs192617776
209	6:7258847:C:T	rs6923241	6	7258847	2.62864e-11	7189858	7279505	63	51	4	1	rs6923241
210	6:20486798:C:T	rs4134963	6	20486798	6.02924e-14	20425741	20703952	125	105	6	3	rs4712498;rs4134963;rs6906327
211	6:23440276:C:T	rs147322611	6	23440276	1.11312e-12	23440276	23440276	1	1	1	1	rs147322611
212	6:26200677:A:G	rs806794	6	26200677	4.88885e-08	26180634	26259807	14	10	1	1	rs806794
213	6:27303745:A:T	rs9368503	6	27303745	1.7134e-08	27303745	27363644	9	8	1	1	rs9368503
214	6:28109960:A:G	rs1871695	6	28109960	1.52633e-09	27982594	28337769	125	100	3	2	rs1871695;rs12661831
215	6:29548216:C:T	rs114024168	6	29548216	3.6804e-08	29548216	29548216	1	1	1	1	rs114024168
216	6:33308380:A:G	rs112199989	6	33308380	1.14134e-08	33184894	33607224	26	18	3	2	rs112199989;rs28360584
217	6:34192036:A:C	rs114760566	6	34192036	1.58275e-35	34067732	35676991	679	460	19	5	rs114760566;rs12662905;rs2744944;rs9658080;rs2395634
218	6:36634156:A:G	rs6930083	6	36634156	4.05541e-11	36616366	36648920	31	24	2	1	rs6930083
219	6:40371918:C:T	rs1579557	6	40371918	1.92519e-09	40348653	40383533	17	14	1	1	rs1579557
220	6:41941993:C:T	rs72853828	6	41941993	6.06472e-09	41924931	41992518	27	22	2	1	rs72853828
221	6:43757896:A:C	rs998584	6	43757896	1.58786e-151	43683804	43829941	195	162	27	9	rs4711748;rs9381248;rs10434;rs3025053;rs998584;rs2396086;rs112222843;rs6910726;rs881858
222	6:48694618:G:T	rs181657028	6	48694618	1.0002e-15	48694618	48840940	2	1	1	1	rs181657028
223	6:51622129:A:G	rs146684154	6	51622129	1.36391e-08	51480056	51622129	7	6	2	2	rs78338411;rs146684154
224	6:52631188:A:G	rs2749029	6	52631188	1.97021e-17	52613481	52738427	168	129	4	1	rs2749029
225	6:55437238:C:T	rs73744635	6	55437238	6.77409e-13	55262565	55459912	30	26	2	2	rs10807492;rs73744635
226	6:63405675:A:G	rs183867390	6	63405675	1.2392e-12	62519262	63791282	8	4	1	1	rs183867390
227	6:72522321:A:G	rs138191773	6	72522321	3.21333e-11	72458211	72600400	5	5	2	1	rs138191773
228	6:87442715:C:T	rs182727815	6	87442715	3.35399e-09	86134059	88364648	683	463	2	2	rs9359658;rs182727815
229	6:98577689:C:T	rs9372734	6	98577689	1.84104e-09	98547979	98591622	33	19	1	1	rs9372734
230	6:100953148:A:G	rs240764	6	100953148	2.19841e-08	100909398	101273149	366	297	1	1	rs240764
231	6:106378009:G:T	rs6913325	6	106378009	5.88981e-11	106354225	106381965	23	18	5	2	rs10456852;rs6913325
232	6:107441254:C:T	rs62427983	6	107441254	4.88944e-13	107422239	107446540	31	25	2	1	rs62427983
233	6:109237426:C:T	rs2806377	6	109237426	3.64818e-17	109160380	109648353	123	88	2	2	rs2806377;rs7757193
234	6:111230247:A:G	rs1068706	6	111230247	8.64164e-09	110969774	111340793	250	190	2	1	rs1068706
235	6:113677103:A:T	rs184662448	6	113677103	1.98846e-10	113677103	113677103	1	1	1	1	rs184662448
236	6:121764006:A:G	rs10456939	6	121764006	6.35851e-09	121724493	121773684	20	16	2	1	rs10456939
237	6:127454893:A:G	rs72959041	6	127454893	7.17255e-37	126659043	127532807	834	612	14	5	rs9398803;rs987763;rs184634289;rs1936805;rs72959041
238	6:130354855:C:T	rs9388766	6	130354855	4.37628e-20	130311831	130460244	181	145	9	1	rs9388766
239	6:133827354:A:G	rs2277083	6	133827354	7.23561e-11	133096657	133849789	46	31	4	3	rs41286196;rs56017741;rs2277083
240	6:139834012:G:T	rs632057	6	139834012	1.92317e-68	139793908	139862897	146	102	17	4	rs1468708;rs3010285;rs632057;rs602261
241	6:140613245:A:G	rs9376512	6	140613245	3.09704e-09	140263827	140779173	307	248	2	1	rs9376512
242	6:148830398:C:T	rs33951897	6	148830398	1.04385e-08	148830398	148846853	4	2	1	1	rs33951897
243	6:152892539:A:G	rs9371609	6	152892539	1.59775e-08	152875862	152916571	12	9	1	1	rs9371609
244	6:153473232:C:T	rs1281978	6	153473232	2.29011e-14	153364643	153496118	258	204	3	1	rs1281978
245	6:156626285:A:G	rs116531975	6	156626285	2.95936e-08	156594454	156626285	2	1	1	1	rs116531975
246	6:161092438:C:T	rs11751347	6	161092438	1.25154e-60	160273528	161702117	735	583	48	15	rs9457827;rs146203232;rs118034905;rs13211753;rs9457881;rs381194;rs117110373;rs2504921;rs10455872;rs140570886;rs78432041;rs11751347;rs7758766;rs79570361;rs142596777
247	6:163209334:A:G	rs7452149	6	163209334	8.03298e-10	162935304	163209495	127	97	1	1	rs7452149
248	6:163740089:A:G	rs6927207	6	163740089	5.4866e-13	163736204	163745411	20	9	1	1	rs6927207
249	6:164133001:C:T	rs4709746	6	164133001	2.66726e-22	164092291	164133001	10	9	2	1	rs4709746
250	6:166182805:A:C	rs4305701	6	166182805	4.18989e-09	166144207	166195063	23	18	1	1	rs4305701
251	7:579473:A:G	rs35934580	7	579473	3.41407e-12	579473	579473	1	1	1	1	rs35934580
252	7:1010801:C:G	rs71538127	7	1010801	1.79959e-14	996645	1219553	229	158	11	1	rs71538127
253	7:5574239:C:G	rs852388	7	5574239	8.81125e-15	5534598	5579707	67	38	3	1	rs852388
254	7:12224708:C:T	rs10950390	7	12224708	5.43529e-11	12200060	12285140	152	118	3	1	rs10950390
255	7:15883727:C:G	rs17169104	7	15883727	1.73068e-11	15883552	16092055	168	135	3	1	rs17169104
256	7:17920253:C:G	rs17138358	7	17920253	9.28822e-32	17280513	18041218	572	461	22	4	rs6968865;rs60223362;rs145170367;rs17138358
257	7:23851207:G:T	rs13244529	7	23851207	5.42975e-09	23489874	24100210	9	9	1	1	rs13244529
258	7:25991826:C:T	rs4722551	7	25991826	1.60093e-33	25850464	26422042	418	324	24	5	rs4722530;rs4722551;rs4719841;rs146142657;rs1534696
259	7:28256240:A:G	rs498475	7	28256240	1.97861e-12	28142088	28259233	53	41	3	1	rs498475
260	7:29319249:A:G	rs11980456	7	29319249	7.5769e-10	29315357	29410867	102	85	2	1	rs11980456
261	7:30728452:C:T	rs917195	7	30728452	7.6604e-10	30553697	30730310	49	42	2	1	rs917195
262	7:44197583:G:T	rs2070971	7	44197583	5.74738e-17	44191309	44265179	37	29	3	2	rs2070971;rs2971669
263	7:46458252:C:G	rs35944658	7	46458252	3.27715e-08	46456878	46581447	7	7	1	1	rs35944658
264	7:50786663:A:G	rs2108349	7	50786663	1.17736e-08	50697051	50877319	130	106	2	1	rs2108349
265	7:73058017:A:G	rs7777102	7	73058017	0	71253553	73663898	923	635	98	31	rs148543887;rs112314670;rs35867424;rs28454618;rs7785440;rs147767686;rs117260553;rs799302;rs42133;rs1811210;rs1178982;rs113452856;rs117624871;rs2353082;rs182118140;rs181157713;rs799157;rs62466303;rs369585671;rs74468720;rs7777102;rs189524662;rs4717793;rs73138819;rs141116009;rs10246419;rs148822367;rs117054103;rs145743281;rs810548;rs62476364
266	7:74002323:C:T	rs111914893	7	74002323	1.22443e-12	73992830	74251108	34	22	2	1	rs111914893
267	7:75161318:A:T	rs809439	7	75161318	6.44177e-10	75038408	75176196	48	19	1	1	rs809439
268	7:76036364:A:G	rs6465120	7	76036364	6.19117e-13	75599687	76046324	354	286	9	3	rs17853284;rs2302429;rs6465120
269	7:77337847:C:T	rs13238386	7	77337847	2.70339e-09	77113701	77597488	267	191	2	1	rs13238386
270	7:116494323:A:T	rs41794	7	116494323	3.66596e-10	116327430	116571847	119	97	4	1	rs41794
271	7:116976830:A:G	rs6977665	7	116976830	6.68912e-09	116954785	117236266	120	97	1	1	rs6977665
272	7:118227021:A:G	rs191596744	7	118227021	1.79251e-11	117691899	118227021	4	3	1	1	rs191596744
273	7:130437476:A:G	rs7810507	7	130437476	1.39517e-60	130422934	130585623	100	85	4	2	rs7810507;rs157935
274	7:137275835:C:T	rs142291097	7	137275835	2.60124e-17	137275835	137275835	1	1	1	1	rs142291097
275	7:137622884:A:G	rs273985	7	137622884	2.90281e-08	137612571	137632678	25	21	1	1	rs273985
276	7:149175913:C:T	rs876781	7	149175913	4.86515e-08	149169736	149337403	88	70	1	1	rs876781
277	7:150214465:G:T	rs7808446	7	150214465	1.00364e-21	150179028	150696008	691	482	18	4	rs7808446;rs10224387;rs62492368;rs2968864
278	8:4817813:G:T	rs12542818	8	4817813	1.89991e-10	4785698	4838459	94	78	1	1	rs12542818
279	8:9173209:A:G	rs7012637	8	9173209	4.47003e-75	8088230	12199830	8383	6753	577	48	rs1878561;rs2140124;rs11989653;rs7003528;rs74994574;rs7017739;rs74672809;rs7823283;rs922706;rs76448484;rs7012637;rs2169387;rs2199403;rs17662231;rs77705851;rs9694004;rs73204606;rs587059;rs79687244;rs10088365;rs2952185;rs74481786;rs62490330;rs6982308;rs7006052;rs56062414;rs6601501;rs58772184;rs7821812;rs17721796;rs79107778;rs28635971;rs80270292;rs74842363;rs7000824;rs78800805;rs2253946;rs73201420;r…
280	8:12632903:G:T	rs4474021	8	12632903	4.25397e-14	12617857	12649168	21	16	1	1	rs4474021
281	8:13113788:A:G	rs185798791	8	13113788	1.74613e-11	13113788	13113788	1	1	1	1	rs185798791
282	8:16291758:C:T	rs1526455	8	16291758	8.37496e-09	16221569	16307343	62	51	1	1	rs1526455
283	8:19776981:A:C	rs4466415	8	19776981	0	17616562	21315549	2148	1638	282	81	rs478420;rs34992950;rs73206145;rs1495741;rs189590646;rs76069230;rs34520389;rs117020884;rs4922078;rs116998829;rs58141703;rs6586858;rs73202524;rs35671259;rs7017756;rs144879927;rs11781244;rs111251122;rs7005265;rs144473554;rs148339574;rs3758060;rs76769796;rs57077102;rs117860853;rs6586875;rs73607786;rs3898938;rs10102717;rs148048657;rs4466415;rs187013686;rs268;rs144578061;rs283;rs308;rs117910839;rs3289…
284	8:23610799:G:T	rs1561105	8	23610799	8.06895e-13	23572963	23617879	49	37	1	1	rs1561105
285	8:25464670:G:T	rs73221948	8	25464670	1.27121e-12	25464656	25464670	2	2	2	1	rs73221948
286	8:26271120:C:T	rs58153210	8	26271120	3.5006e-09	26188998	26271120	22	17	1	1	rs58153210
287	8:30140452:A:G	rs150202209	8	30140452	8.51056e-12	30035910	30140452	4	1	1	1	rs150202209
288	8:30956654:C:G	rs12549825	8	30956654	3.44807e-10	30819854	30956654	73	54	4	1	rs12549825
289	8:34380276:A:T	rs6468266	8	34380276	3.13161e-09	34240096	34503172	152	130	2	1	rs6468266
290	8:36846435:A:G	rs75772194	8	36846435	2.28251e-10	36658914	36859186	50	38	1	1	rs75772194
291	8:37399290:A:G	rs2407278	8	37399290	1.37906e-09	37381976	37405377	13	13	2	1	rs2407278
292	8:38324616:A:G	rs6994556	8	38324616	1.00822e-09	38321607	38351310	22	18	1	1	rs6994556
293	8:42429676:C:T	rs149448659	8	42429676	2.53858e-09	42429676	42429676	1	1	1	1	rs149448659
294	8:47641154:G:T	rs187574160	8	47641154	9.62542e-38	47193249	48588752	7	3	1	1	rs187574160
295	8:59388565:C:T	rs2081687	8	59388565	2.51993e-19	59256985	59567885	262	218	7	2	rs2081687;rs6997473
296	8:64608119:A:T	rs1149470	8	64608119	1.68491e-13	64496159	64875487	275	220	4	1	rs1149470
297	8:66985121:A:G	rs28396616	8	66985121	7.0686e-09	66974385	66985121	3	3	2	1	rs28396616
298	8:69549416:G:T	rs140618562	8	69549416	2.95871e-08	69425696	69549416	4	1	1	1	rs140618562
299	8:71114795:A:G	rs62530460	8	71114795	1.11883e-08	71017690	71999126	1181	890	3	3	rs62530460;rs62508819;rs80181386
300	8:72459889:A:G	rs13269725	8	72459889	1.44523e-19	72386394	72531550	87	74	6	1	rs13269725
301	8:73440371:G:T	rs35957544	8	73440371	3.57277e-11	73426371	73499301	40	30	3	1	rs35957544
302	8:73895113:C:T	rs7017476	8	73895113	2.99333e-08	73874962	73983031	41	32	1	1	rs7017476
303	8:79638155:C:T	rs187367044	8	79638155	2.93484e-09	79638155	79638155	1	1	1	1	rs187367044
304	8:95997165:C:T	rs61596977	8	95997165	2.1946e-08	95906794	96080389	153	121	1	1	rs61596977
305	8:103873091:A:G	rs1991928	8	103873091	6.27319e-11	103816785	103926197	60	46	1	1	rs1991928
306	8:105981953:A:C	rs3110291	8	105981953	7.97847e-10	105958505	105982608	36	18	1	1	rs3110291
307	8:112570229:A:G	rs150802155	8	112570229	2.23149e-08	112307863	112570229	3	1	1	1	rs150802155
308	8:116639462:G:T	rs2737225	8	116639462	2.79743e-23	116464988	116718497	202	183	7	3	rs2737218;rs2737225;rs182757489
309	8:118191475:C:T	rs35859536	8	118191475	4.44201e-13	118184783	118220270	10	9	2	1	rs35859536
310	8:126491304:C:T	rs2954030	8	126491304	9.80941e-289	126098958	126704590	449	341	74	30	rs117781948;rs2954011;rs181968134;rs2980874;rs62521034;rs62521037;rs4871598;rs79336077;rs72655672;rs72655677;rs2954030;rs62523860;rs76993561;rs75164422;rs7012891;rs78309295;rs17420217;rs73706832;rs4870944;rs1963945;rs2124038;rs139020749;rs139827355;rs4870949;rs7826687;rs72724634;rs111382124;rs4870950;rs897157;rs143778508
311	8:128403887:A:G	rs10956365	8	128403887	3.31935e-08	128403887	128403887	1	1	1	1	rs10956365
312	8:131592859:C:G	rs138274614	8	131592859	4.10406e-08	130827317	132516644	16	1	1	1	rs138274614
313	8:138176558:A:G	rs117091952	8	138176558	1.42017e-08	138176558	138541350	3	2	1	1	rs117091952
314	8:144306379:A:G	rs7832515	8	144306379	1.79998e-22	144275144	144684702	367	275	13	3	rs7832515;rs6997726;rs10099134
315	9:1033773:C:G	rs1567353	9	1033773	1.03753e-20	1032567	1057318	41	38	8	3	rs1567353;rs117328325;rs3824419
316	9:1642998:C:G	rs1853413	9	1642998	1.15788e-09	1631379	1643927	25	22	1	1	rs1853413
317	9:11579598:C:T	rs2165864	9	11579598	7.9266e-09	11179005	11847356	534	447	4	1	rs2165864
318	9:16901067:A:C	rs62543565	9	16901067	5.17629e-14	16846260	16913836	74	53	3	1	rs62543565
319	9:22134094:C:T	rs10811661	9	22134094	3.74041e-09	22132076	22136489	9	8	1	1	rs10811661
320	9:28414625:C:T	rs17770336	9	28414625	3.60364e-08	28410683	28488365	30	19	1	1	rs17770336
321	9:33854960:G:T	rs1325105	9	33854960	2.4563e-08	33759363	34071144	118	82	1	1	rs1325105
322	9:75923983:C:T	rs192226974	9	75923983	6.12077e-11	75857090	75923983	2	2	1	1	rs192226974
323	9:86583076:C:T	rs696825	9	86583076	5.12274e-15	86222717	86694759	164	122	4	1	rs696825
324	9:88671578:A:G	rs188311116	9	88671578	1.81494e-29	88368314	89635306	9	2	1	1	rs188311116
325	9:92202495:C:T	rs10797119	9	92202495	9.11617e-20	92011362	92289984	286	225	10	3	rs35014607;rs10797119;rs10123200
326	9:95382297:C:T	rs12686780	9	95382297	2.09689e-16	94939154	95576781	312	248	4	1	rs12686780
327	9:96330499:A:G	rs6479494	9	96330499	1.66875e-08	96185331	96337423	77	64	1	1	rs6479494
328	9:98336946:A:G	rs149167959	9	98336946	2.74245e-11	98336946	98336946	1	1	1	1	rs149167959
329	9:102162570:C:T	rs62565259	9	102162570	5.61335e-13	102104426	102260916	3	2	1	1	rs62565259
330	9:107651174:C:T	rs2275543	9	107651174	5.3889e-19	107585213	107688297	80	62	7	4	rs4149307;rs11789603;rs2275543;rs10820747
331	9:110828405:A:G	rs75781523	9	110828405	2.2447e-11	110777853	110828405	2	1	1	1	rs75781523
332	9:112241136:C:T	rs77824033	9	112241136	5.93524e-11	112236113	112260246	22	18	1	1	rs77824033
333	9:113828811:A:G	rs1008158	9	113828811	4.9101e-08	113828811	113830547	2	2	1	1	rs1008158
334	9:117098650:C:T	rs1044531	9	117098650	5.55753e-15	117098650	117098650	1	1	1	1	rs1044531
335	9:119258187:C:T	rs767432	9	119258187	2.99386e-10	119243634	119266468	23	22	2	1	rs767432
336	9:123485333:C:T	rs12554440	9	123485333	1.10979e-10	123354222	123634040	142	112	2	1	rs12554440
337	9:124568229:C:T	rs4837889	9	124568229	1.99485e-09	124560496	124644295	87	62	2	1	rs4837889
338	9:131567995:A:G	rs7854319	9	131567995	2.20617e-09	131561110	131652063	91	69	1	1	rs7854319
339	9:134936285:A:G	rs3935636	9	134936285	7.01365e-09	134723264	134983511	129	105	2	1	rs3935636
340	9:136141870:C:T	rs2519093	9	136141870	7.89144e-21	136065526	136339755	153	118	11	3	rs75179845;rs2519093;rs79158370
341	10:13670441:A:G	rs10906428	10	13670441	8.30706e-09	13636301	13692888	26	23	1	1	rs10906428
342	10:33606189:A:G	rs2776937	10	33606189	1.46073e-11	33450227	33654291	80	69	7	2	rs2776937;rs12356891
343	10:33970319:C:T	rs16934748	10	33970319	3.12016e-10	33949897	34019293	96	75	5	1	rs16934748
344	10:38792875:C:T	rs117756105	10	38792875	4.40627e-13	37478814	39153176	29	2	2	2	rs190597397;rs117756105
345	10:52616492:A:G	rs150770378	10	52616492	7.8115e-27	52148230	52718339	11	7	4	1	rs150770378
346	10:61467182:G:T	rs1171617	10	61467182	3.24784e-16	61322798	61729512	43	38	8	4	rs10826337;rs56370926;rs188032366;rs1171617
347	10:65012750:C:T	rs4454603	10	65012750	4.32389e-55	64761091	65474912	1097	835	28	2	rs146334713;rs4454603
348	10:71883836:A:C	rs41277978	10	71883836	3.01625e-09	71883836	71883836	1	1	1	1	rs41277978
349	10:74197364:C:T	rs143067793	10	74197364	6.84349e-16	74131542	75560670	539	408	8	4	rs143067793;rs11000468;rs3829126;rs77718384
350	10:77257791:G:T	rs4617527	10	77257791	1.48743e-10	77170685	77514775	89	70	4	2	rs4617527;rs74696323
351	10:89788360:A:G	rs7901647	10	89788360	4.33699e-12	89548270	89901708	103	83	6	1	rs7901647
352	10:94839642:A:G	rs2068888	10	94839642	4.70248e-64	93478421	95360964	1247	937	61	15	rs2792022;rs17875327;rs11187139;rs2497337;rs11187183;rs835269;rs117545698;rs12783274;rs2068888;rs72815121;rs11187287;rs1222925;rs72819010;rs113344423;rs36014035
353	10:99772190:C:T	rs565108	10	99772190	6.92641e-21	99694970	99807046	67	50	6	1	rs565108
354	10:112509661:A:G	rs182511815	10	112509661	1.9167e-14	112509661	112509661	1	1	1	1	rs182511815
355	10:113934384:C:G	rs2803619	10	113934384	2.74422e-46	113883047	114128630	209	156	14	4	rs2803619;rs117812504;rs4306236;rs74563318
356	10:114758349:C:T	rs7903146	10	114758349	4.26324e-11	114749734	114817009	27	26	1	1	rs7903146
357	10:115792062:A:G	rs2484294	10	115792062	5.43424e-25	115755182	115819694	105	93	6	3	rs422978;rs72823014;rs2484294
358	10:119190933:C:T	rs145155595	10	119190933	6.07582e-10	119190933	119190933	1	1	1	1	rs145155595
359	10:122992475:C:T	rs11199845	10	122992475	3.11646e-14	122972439	123000639	42	35	3	1	rs11199845
360	10:126383363:C:T	rs4450131	10	126383363	1.68812e-08	126320721	126383363	20	18	1	1	rs4450131
361	10:134459388:A:G	rs1133400	10	134459388	2.38261e-11	134413500	134459388	3	3	1	1	rs1133400
362	11:380315:C:T	rs117291242	11	380315	3.31707e-12	380315	408174	2	2	1	1	rs117291242
363	11:823586:C:G	rs140201358	11	823586	4.02627e-12	823586	823586	1	1	1	1	rs140201358
364	11:1881256:C:T	rs587961	11	1881256	4.18485e-11	1874845	1898664	27	24	3	1	rs587961
365	11:5165483:C:T	rs186747963	11	5165483	4.88791e-08	5165483	5165483	1	1	1	1	rs186747963
366	11:10675738:A:G	rs10840457	11	10675738	3.25895e-14	10015793	10699750	296	218	5	3	rs4444073;rs12793175;rs10840457
367	11:13361524:C:T	rs6486122	11	13361524	4.40428e-19	13261705	13370535	199	174	7	1	rs6486122
368	11:14561945:C:G	rs79634051	11	14561945	1.29906e-14	14133432	15090794	57	47	6	4	rs76613195;rs79634051;rs144438564;rs117776155
369	11:17769132:A:C	rs7938573	11	17769132	4.57984e-09	17762862	17783101	18	16	1	1	rs7938573
370	11:23390202:A:G	rs140630758	11	23390202	1.12033e-09	23302024	23390202	3	2	1	1	rs140630758
371	11:26281664:C:G	rs1461396	11	26281664	2.1563e-13	26046964	26363333	358	277	3	1	rs1461396
372	11:27748493:A:C	rs17309930	11	27748493	2.35199e-27	27455582	27748493	182	144	8	2	rs6484320;rs17309930
373	11:30395895:G:T	rs490937	11	30395895	1.69621e-08	30217503	30418246	98	70	1	1	rs490937
374	11:43601691:G:T	rs79321412	11	43601691	3.58883e-10	43601691	43601691	1	1	1	1	rs79321412
375	11:47259668:C:T	rs326222	11	47259668	2.76305e-88	45356231	51581244	5888	4266	128	34	rs78994850;rs3808976;rs77403571;rs12417410;rs80078546;rs4237662;rs7943699;rs112990625;rs147244995;rs55971594;rs3136447;rs71474191;rs111707337;rs113954134;rs2291120;rs326222;rs11570051;rs3729986;rs3781627;rs11039325;rs111834609;rs55944135;rs58405523;rs190716785;rs566217606;rs117103243;rs34933432;rs141697493;rs11602981;rs12366190;rs78297458;rs12422125;rs187657786;rs1846258
376	11:54796787:C:T	rs111514504	11	54796787	1.1195e-19	54713805	57174630	943	714	24	10	rs111514504;rs12806498;rs76583437;rs184750177;rs12363672;rs138139021;rs147411470;rs12417343;rs12797544;rs10896604
377	11:60955332:A:G	rs7934157	11	60955332	1.75194e-09	60888519	60955332	63	48	2	2	rs628963;rs7934157
378	11:61557803:C:T	rs102275	11	61557803	3.74997e-202	61405178	61870328	441	358	54	16	rs11230796;rs79519287;rs628993;rs102275;rs61897792;rs174569;rs139957766;rs73487492;rs7115739;rs7394871;rs174480;rs2727260;rs12799017;rs187651672;rs2015950;rs11603446
379	11:62362293:A:G	rs11231154	11	62362293	2.68279e-21	62192931	62447563	128	94	5	2	rs3017106;rs11231154
380	11:64031241:C:T	rs35169799	11	64031241	3.74115e-48	63788388	66182450	650	508	46	15	rs189801149;rs184022927;rs186443073;rs35169799;rs11231740;rs143044519;rs115352086;rs678614;rs112868502;rs10750766;rs117104648;rs146161054;rs622614;rs4930352;rs144718240
381	11:67997939:A:G	rs11228171	11	67997939	2.14359e-08	67992324	68000579	6	4	1	1	rs11228171
382	11:68597886:G:T	rs11605837	11	68597886	9.28816e-19	68593134	68789606	198	150	5	1	rs11605837
383	11:69299537:C:G	rs4980659	11	69299537	2.06202e-10	69283141	69307444	11	11	1	1	rs4980659
384	11:75887292:A:G	rs111995056	11	75887292	1.48346e-08	75887292	75887292	1	1	1	1	rs111995056
385	11:77777334:A:C	rs608550	11	77777334	1.32693e-08	77749062	77823557	25	21	1	1	rs608550
386	11:78384794:A:G	rs149119675	11	78384794	2.90302e-09	78348809	78384794	2	1	1	1	rs149119675
387	11:109968055:C:T	rs7126991	11	109968055	5.59027e-12	109959102	110033291	97	78	2	1	rs7126991
388	11:111421906:A:G	rs117847213	11	111421906	1.97033e-17	111320003	111988926	222	174	7	2	rs117847213;rs615642
389	11:116521558:A:G	rs575906	11	116521558	0	116133227	117568676	3020	2364	322	92	rs77081377;rs187217942;rs12280893;rs2174880;rs10437673;rs17119701;rs1108627;rs1508102;rs7952521;rs883863;rs117169710;rs74873767;rs117794084;rs61426083;rs7110879;rs11216020;rs11216023;rs76376430;rs10891997;rs34899605;rs61904859;rs1240660;rs12417676;rs1145183;rs74948313;rs523549;rs519000;rs575906;rs151215655;rs117137955;rs34125463;rs9681206;rs12417015;rs11826999;rs1145210;rs145316097;rs75310100;rs1…
390	11:118396331:A:T	rs1064939	11	118396331	4.43389e-11	118194647	118474719	133	101	3	2	rs1064939;rs4326835
391	11:118913993:C:T	rs1003081	11	118913993	5.23648e-18	118765600	118961231	109	76	5	3	rs3922;rs12364331;rs1003081
392	11:121800971:A:G	rs1622638	11	121800971	4.86769e-15	121772095	121822656	79	57	3	1	rs1622638
393	11:126221298:G:T	rs78471630	11	126221298	4.52896e-09	126218153	126229617	12	10	1	1	rs78471630
394	12:4328521:A:G	rs117233107	12	4328521	3.53712e-17	4175561	4328521	4	4	3	1	rs117233107
395	12:6731818:A:G	rs10774439	12	6731818	9.6948e-17	6580443	6873818	180	128	7	2	rs10774439;rs4492872
396	12:20470221:A:C	rs11045172	12	20470221	1.04251e-39	20392267	20643574	113	90	10	4	rs1373571;rs11045172;rs12369443;rs11045247
397	12:21343886:A:G	rs67981690	12	21343886	7.53916e-16	21323338	21415496	66	42	3	1	rs67981690
398	12:21726012:A:G	rs10770837	12	21726012	3.11067e-09	21682239	21746567	154	120	2	1	rs10770837
399	12:24031006:A:G	rs7309072	12	24031006	1.25748e-08	24031006	24068456	15	12	1	1	rs7309072
400	12:26459420:C:T	rs1398676	12	26459420	6.26683e-19	26253557	26532354	186	155	8	3	rs7977928;rs10842680;rs1398676
401	12:27140549:C:T	rs117948075	12	27140549	5.93604e-11	26809412	27402759	18	18	3	2	rs17482258;rs117948075
402	12:34035030:A:C	rs11052977	12	34035030	1.91721e-12	33596654	34856670	1503	1173	4	2	rs11052977;rs12367445
403	12:37896288:A:T	rs4002684	12	37896288	3.82559e-11	37856814	39331847	1660	1182	4	2	rs4002684;rs1486357
404	12:40688286:C:T	rs74978589	12	40688286	5.61769e-10	40444236	41023480	4	2	1	1	rs74978589
405	12:46215895:C:T	rs35763453	12	46215895	1.08834e-09	46133446	46267260	4	3	1	1	rs35763453
406	12:47184042:C:T	rs12306007	12	47184042	1.03708e-08	47180370	47222144	19	17	1	1	rs12306007
407	12:48202696:C:G	rs111264094	12	48202696	3.20098e-09	48143315	48202696	2	2	1	1	rs111264094
408	12:54425000:G:T	rs56270790	12	54425000	1.16332e-12	54417525	54445218	36	29	1	1	rs56270790
409	12:56473808:C:T	rs7297175	12	56473808	1.73505e-10	56368078	56609885	59	39	2	1	rs7297175
410	12:57823585:A:C	rs7964492	12	57823585	1.04945e-46	56869577	58233894	541	414	26	11	rs10735864;rs61937819;rs58298943;rs61937595;rs79654308;rs115943545;rs7964492;rs2228226;rs71461327;rs1689589;rs111830825
411	12:62838230:C:T	rs113439801	12	62838230	1.24289e-08	62832042	63033387	66	49	1	1	rs113439801
412	12:63520912:C:T	rs10877962	12	63520912	4.59566e-08	63488462	63644087	37	27	1	1	rs10877962
413	12:65902265:C:T	rs145775785	12	65902265	7.57044e-10	65869436	65902265	2	2	1	1	rs145775785
414	12:66358347:C:T	rs1042725	12	66358347	9.97328e-14	66326943	66379504	24	19	2	1	rs1042725
415	12:67645247:A:T	rs775633	12	67645247	3.36996e-10	67638704	67790676	220	179	1	1	rs775633
416	12:71110249:A:G	rs11178376	12	71110249	1.6159e-09	71096471	71114400	33	25	2	1	rs11178376
417	12:80986877:C:T	rs186177360	12	80986877	6.10812e-11	80977034	81017715	3	1	1	1	rs186177360
418	12:83949710:A:G	rs371143	12	83949710	5.41525e-09	83858153	84171308	198	145	2	1	rs371143
419	12:102898446:A:G	rs860598	12	102898446	5.90921e-13	102394872	102962583	230	197	3	2	rs6220;rs860598
420	12:107205390:A:G	rs7977765	12	107205390	3.31747e-15	106790740	107368756	209	164	6	1	rs7977765
421	12:109698566:A:T	rs7298135	12	109698566	2.05266e-14	109685093	111275317	342	274	11	5	rs7298135;rs61748069;rs3782897;rs1860561;rs11065724
422	12:111932800:C:T	rs7137828	12	111932800	4.99933e-24	111662578	112906415	142	117	6	1	rs7137828
423	12:117175856:A:G	rs11832734	12	117175856	6.15405e-11	117146344	117177096	21	18	2	1	rs11832734
424	12:119770986:A:G	rs189540221	12	119770986	7.00037e-09	119770986	119770986	1	1	1	1	rs189540221
425	12:124409502:A:G	rs7133378	12	124409502	4.26267e-80	122209033	125380232	2861	2181	157	41	rs11043221;rs11043298;rs2017594;rs1043771;rs116896792;rs1392237;rs61955003;rs645987;rs112003348;rs73226103;rs580063;rs138436155;rs73421642;rs2292137;rs117942921;rs4759360;rs10773000;rs76582395;rs73216951;rs143928387;rs786452;rs6488898;rs4930731;rs34934281;rs141193534;rs7133378;rs77968302;rs10773049;rs117655240;rs11057457;rs9888360;rs74902694;rs117285912;rs867429;rs837500;rs921919;rs865716;rs10773…
426	12:132419409:A:G	rs187647573	12	132419409	2.86178e-08	131674821	133374126	13	1	1	1	rs187647573
427	13:19883157:C:T	rs116904655	13	19883157	2.36358e-08	19883157	19883157	1	1	1	1	rs116904655
428	13:22358947:C:T	rs149980874	13	22358947	4.65426e-08	22325442	22368595	3	3	1	1	rs149980874
429	13:25900838:C:T	rs7990216	13	25900838	2.34295e-11	25334272	25913798	167	132	4	2	rs57784600;rs7990216
430	13:29145323:A:C	rs1340819	13	29145323	1.7352e-11	29141836	29145323	2	2	1	1	rs1340819
431	13:31015138:A:G	rs7321331	13	31015138	5.52332e-10	30989792	31038957	67	45	2	1	rs7321331
432	13:41013358:C:T	rs183919089	13	41013358	8.87916e-22	41013358	41013358	1	1	1	1	rs183919089
433	13:44354020:C:T	rs149951698	13	44354020	1.6673e-09	44354020	44354020	1	1	1	1	rs149951698
434	13:50707087:C:G	rs2812208	13	50707087	7.76113e-15	50125997	51221618	277	226	14	5	rs9526627;rs2812208;rs35824953;rs1327645;rs606252
435	13:58257667:A:T	rs6561937	13	58257667	2.98843e-08	58252801	58297401	21	18	1	1	rs6561937
436	13:67066265:C:T	rs7339194	13	67066265	4.1899e-09	67037493	67199085	106	82	1	1	rs7339194
437	13:71824582:C:T	rs12863082	13	71824582	1.41045e-11	71803515	71839582	23	17	1	1	rs12863082
438	13:74188935:A:G	rs6562773	13	74188935	6.49439e-13	74104887	74196887	128	94	4	1	rs6562773
439	13:94574651:A:C	rs189672455	13	94574651	4.55746e-08	94574651	94657735	2	2	1	1	rs189672455
440	13:95253131:A:C	rs9561643	13	95253131	1.9984e-12	95153167	95258944	216	174	4	1	rs9561643
441	13:99245866:C:T	rs9584870	13	99245866	1.98717e-09	99101057	99245866	60	46	2	1	rs9584870
442	13:112241549:A:G	rs4773395	13	112241549	2.19179e-08	112170900	112245769	91	78	3	1	rs4773395
443	13:113891569:C:T	rs144506038	13	113891569	6.55725e-10	113891569	113891569	1	1	1	1	rs144506038
444	13:114544024:C:T	rs7140110	13	114544024	4.74975e-30	114312605	115047700	418	289	24	6	rs11259842;rs10219951;rs7140110;rs75073260;rs7334688;rs7318527
445	14:24560159:A:G	rs79873985	14	24560159	4.0405e-10	24534337	24859553	8	7	2	2	rs2070341;rs79873985
446	14:33213354:C:T	rs8018424	14	33213354	2.97931e-08	33145590	33213515	21	17	1	1	rs8018424
447	14:47609555:C:T	rs190759989	14	47609555	5.98214e-11	47609555	47624246	2	2	1	1	rs190759989
448	14:49193251:A:G	rs1959555	14	49193251	1.79384e-08	49193251	49193251	1	1	1	1	rs1959555
449	14:52480621:A:G	rs6572807	14	52480621	5.35683e-12	52363937	52499670	50	38	3	2	rs117311385;rs6572807
450	14:53819623:C:T	rs1255310	14	53819623	1.20593e-08	53698773	53850018	249	182	1	1	rs1255310
451	14:60687309:C:T	rs216515	14	60687309	4.45335e-08	60687309	60728031	2	2	1	1	rs216515
452	14:64239629:G:T	rs12878001	14	64239629	4.01748e-14	64227596	64441510	48	39	2	1	rs12878001
453	14:69142390:A:G	rs4902630	14	69142390	1.64406e-10	69138371	69311424	84	70	4	2	rs4902630;rs1295793
454	14:71541026:C:T	rs2240533	14	71541026	3.59864e-14	71350617	71613451	315	213	3	1	rs2240533
455	14:74250126:C:T	rs13379043	14	74250126	1.86286e-10	74234294	74250126	3	3	1	1	rs13379043
456	14:77518204:C:T	rs61991652	14	77518204	1.45994e-10	77453862	77529375	39	25	3	1	rs61991652
457	14:77821608:A:G	rs35549669	14	77821608	1.59671e-08	77780784	77834620	25	19	1	1	rs35549669
458	14:90034799:C:T	rs8021491	14	90034799	2.12009e-11	89789645	90069965	77	65	6	2	rs3825669;rs8021491
459	14:96858667:A:G	rs3742473	14	96858667	1.35797e-08	96743418	96859605	41	34	1	1	rs3742473
460	14:97738951:A:G	rs189844741	14	97738951	3.33903e-09	97738951	97738951	1	1	1	1	rs189844741
461	14:100765823:C:T	rs61993685	14	100765823	3.34344e-15	100428820	101028399	28	20	4	3	rs61993685;rs79849811;rs12894800
462	14:103373434:C:G	rs72704737	14	103373434	3.51226e-08	103230005	103387971	132	102	1	1	rs72704737
463	14:105262368:C:G	rs2498786	14	105262368	3.90061e-14	105248470	105277209	55	40	4	1	rs2498786
464	15:27588875:A:G	rs74199717	15	27588875	6.65263e-09	27585628	27613896	49	44	2	1	rs74199717
465	15:31637569:C:G	rs28510484	15	31637569	6.55056e-10	31637569	31660799	5	5	1	1	rs28510484
466	15:35836522:A:G	rs1838232	15	35836522	8.47964e-11	35730927	35943377	72	58	2	1	rs1838232
467	15:37675409:A:G	rs139832111	15	37675409	1.47177e-12	37587795	37675409	3	1	1	1	rs139832111
468	15:39193338:C:G	rs188821079	15	39193338	1.19232e-08	39193338	39193338	1	1	1	1	rs188821079
469	15:39447529:A:G	rs275179	15	39447529	8.73555e-15	39444679	39668870	33	29	2	2	rs275179;rs28790585
470	15:44027885:C:T	rs139974673	15	44027885	4.84674e-144	40387728	45001900	1467	1115	57	11	rs3803357;rs72735627;rs28551767;rs112628055;rs7170463;rs184334219;rs202077402;rs62019360;rs139974673;rs2733214;rs1901529
471	15:57199592:C:T	rs1657926	15	57199592	1.72355e-13	56812111	57590442	363	291	5	2	rs1657926;rs72749502
472	15:58671765:G:T	rs1601935	15	58671765	1.70497e-20	58671178	58712817	73	66	10	1	rs1601935
473	15:61958660:C:T	rs2249312	15	61958660	3.3951e-15	61913884	62000727	62	53	3	1	rs2249312
474	15:63366282:A:G	rs2937859	15	63366282	9.3366e-28	63329128	64181604	971	748	34	3	rs2937859;rs17184382;rs117044596
475	15:66872114:C:T	rs4776793	15	66872114	9.5681e-18	66587581	66914745	171	131	8	3	rs1549854;rs4776793;rs113411992
476	15:70772414:C:T	rs67151298	15	70772414	1.44766e-08	70769853	70805717	90	72	2	1	rs67151298
477	15:73618238:C:T	rs3826043	15	73618238	1.56527e-11	73236667	73850508	126	120	6	3	rs3826043;rs2247424;rs148279991
478	15:74649262:C:T	rs11072479	15	74649262	1.70725e-10	74592862	74671937	96	80	2	1	rs11072479
479	15:98256227:G:T	rs551325	15	98256227	7.04228e-09	98216946	98335806	95	77	2	1	rs551325
480	15:99222509:A:G	rs56803094	15	99222509	2.44694e-09	99221888	99295650	95	78	2	2	rs56803094;rs11634241
481	15:101876416:C:T	rs2086678	15	101876416	1.74269e-08	101869255	101878724	7	5	1	1	rs2086678
482	16:950922:A:G	rs4262947	16	950922	3.90194e-21	916885	1255885	306	249	10	3	rs143076454;rs4262947;rs35482321
483	16:2462739:C:T	rs8046718	16	2462739	9.96475e-09	2431385	2506130	181	127	1	1	rs8046718
484	16:4676852:A:C	rs1684608	16	4676852	1.62366e-11	4447771	4677497	140	112	3	1	rs1684608
485	16:5526768:C:T	rs192527288	16	5526768	4.12811e-11	5425917	5526768	18	4	2	2	rs192169612;rs192527288
486	16:7666971:A:C	rs9935836	16	7666971	8.72997e-09	7665334	7667965	8	5	1	1	rs9935836
487	16:9713228:A:G	rs4781557	16	9713228	2.06888e-08	9713228	9731366	30	23	1	1	rs4781557
488	16:15150505:A:C	rs12928099	16	15150505	2.28316e-47	13462660	15881206	462	286	31	6	rs188273256;rs10048117;rs62037490;rs12928099;rs4985122;rs153805
489	16:23809268:A:G	rs2520026	16	23809268	2.19916e-10	23756216	23869285	93	75	1	1	rs2520026
490	16:29994922:C:T	rs3814883	16	29994922	3.29886e-23	29878161	30147265	213	162	4	2	rs3814883;rs7202271
491	16:31124407:A:G	rs749767	16	31124407	7.59995e-14	30945887	31149142	72	49	2	1	rs749767
492	16:35173311:A:T	rs116984718	16	35173311	2.52439e-30	34189097	35278953	21	5	1	1	rs116984718
493	16:51187040:C:T	rs9938285	16	51187040	2.54981e-09	51163406	51189169	17	11	1	1	rs9938285
494	16:57010486:C:T	rs117427818	16	57010486	4.51423e-289	56051871	57983925	1136	914	181	69	rs899228;rs2587865;rs146995844;rs150911013;rs375054;rs75152587;rs59238099;rs117777471;rs148970147;rs76245170;rs55994220;rs2011186;rs75566930;rs184949242;rs4784724;rs75281121;rs187633251;rs11643205;rs80082308;rs113948025;rs4784733;rs185334549;rs11640954;rs183506514;rs76361196;rs182185879;rs72786781;rs12444708;rs9938160;rs247615;rs564283356;rs147464145;rs7200805;rs12720918;rs4783961;rs35619327;rs14…
495	16:67940350:A:G	rs55781197	16	67940350	1.45913e-35	66992586	68421601	884	678	24	5	rs75280012;rs79764783;rs55781197;rs11643888;rs111518243
496	16:69750849:C:T	rs2917677	16	69750849	1.95017e-17	69547741	70541308	254	181	9	2	rs2917677;rs35332782
497	16:72108093:A:G	rs2000999	16	72108093	9.64873e-26	71493993	72912880	295	252	19	4	rs2000999;rs4788460;rs35549608;rs55676968
498	16:80934495:A:C	rs7186061	16	80934495	1.20812e-09	80934495	80943448	2	2	1	1	rs7186061
499	16:81534790:C:T	rs2925979	16	81534790	5.50358e-82	81449060	81736324	216	166	26	7	rs2550733;rs77700579;rs80340955;rs2925979;rs12934986;rs7189295;rs11644560
500	16:85150163:A:G	rs79311290	16	85150163	1.43658e-18	85150163	85279573	28	21	2	2	rs79311290;rs11641586
501	16:86441898:C:T	rs72814598	16	86441898	4.9298e-08	86441898	86441898	1	1	1	1	rs72814598
502	16:87995200:A:G	rs12934497	16	87995200	2.52747e-17	87981585	88145665	366	263	10	1	rs12934497
503	16:89660343:A:G	rs62068681	16	89660343	2.64583e-08	89522747	89666961	3	3	1	1	rs62068681
504	17:481604:C:T	rs11870735	17	481604	1.22541e-13	291564	617869	90	50	4	1	rs11870735
505	17:4692640:G:T	rs79202680	17	4692640	2.11811e-11	4549802	5387331	66	51	5	2	rs34923832;rs79202680
506	17:7440984:C:T	rs9902027	17	7440984	3.13191e-18	6989296	7625063	251	180	23	6	rs146261845;rs12449427;rs117643180;rs56360822;rs9902027;rs1641549
507	17:17458353:A:G	rs7215055	17	17458353	5.81014e-25	16487269	18846654	787	570	25	8	rs16961505;rs1263507;rs70965415;rs7215055;rs56157833;rs9894492;rs672356;rs71372293
508	17:33598061:A:G	rs2622525	17	33598061	2.70159e-08	33593024	33614452	8	7	1	1	rs2622525
509	17:37810218:C:G	rs881844	17	37810218	4.66912e-14	37396201	38215495	685	543	10	2	rs881844;rs2302776
510	17:41926126:C:T	rs72836561	17	41926126	3.34184e-184	39939982	42628213	1046	778	66	20	rs117726639;rs6963;rs55999482;rs144727181;rs8176151;rs113905686;rs8066100;rs558261769;rs6503468;rs62078657;rs72836561;rs11867362;rs72836567;rs78466148;rs1642603;rs113368813;rs228767;rs147909757;rs116636700;rs1476512
511	17:43194413:C:T	rs112162280	17	43194413	3.73407e-10	43187221	43201240	8	7	2	1	rs112162280
512	17:46197755:A:G	rs10775406	17	46197755	1.14844e-16	45883188	46554456	495	385	12	3	rs4793681;rs10775406;rs1509637
513	17:46957987:A:G	rs595767	17	46957987	3.73635e-20	46835629	47515176	694	529	17	3	rs595767;rs12948660;rs9891264
514	17:48624523:A:C	rs9890200	17	48624523	1.08149e-08	48624523	48637385	18	13	1	1	rs9890200
515	17:53846639:C:T	rs75145770	17	53846639	2.42845e-08	53822808	53914710	37	28	1	1	rs75145770
516	17:57878509:A:G	rs2645490	17	57878509	5.17901e-13	57796677	58046246	132	94	2	1	rs2645490
517	17:64224775:C:T	rs8178824	17	64224775	7.91615e-18	63772152	64378442	143	113	5	3	rs35337556;rs7221380;rs8178824
518	17:65870073:C:T	rs12602912	17	65870073	1.92923e-29	65762341	66098154	479	330	9	1	rs12602912
519	17:66879927:C:T	rs34931250	17	66879927	1.20531e-20	66375430	67290438	59	44	5	2	rs181013348;rs34931250
520	17:68454400:A:G	rs9904355	17	68454400	2.67467e-12	68406243	68511145	79	68	3	1	rs9904355
521	17:69779857:G:T	rs188395566	17	69779857	4.16199e-10	69779857	69779857	1	1	1	1	rs188395566
522	17:70296543:A:G	rs11653006	17	70296543	2.18314e-09	70270854	70299447	16	13	1	1	rs11653006
523	17:72389605:C:T	rs147656440	17	72389605	1.03239e-10	72389605	72389605	1	1	1	1	rs147656440
524	17:73308346:C:T	rs9909443	17	73308346	4.53993e-11	73249256	73417662	208	145	2	1	rs9909443
525	17:73790093:C:G	rs1047743	17	73790093	3.43815e-08	73759552	73878654	57	43	1	1	rs1047743
526	17:74211208:A:C	rs10512606	17	74211208	2.10212e-15	74135619	74303832	160	116	5	2	rs10512606;rs193220
527	17:76391454:G:T	rs4969179	17	76391454	7.88361e-28	76361175	76832133	217	174	9	2	rs4969179;rs11649964
528	17:78270679:A:G	rs9889839	17	78270679	2.3203e-08	78270679	78290310	5	4	1	1	rs9889839
529	18:287705:G:T	rs8088001	18	287705	1.65936e-16	36726	294906	243	129	10	2	rs60205347;rs8088001
530	18:2846812:A:T	rs11664106	18	2846812	1.23653e-15	2846499	2846812	2	2	1	1	rs11664106
531	18:11705841:A:G	rs145560635	18	11705841	2.50442e-13	11705841	11705841	1	1	1	1	rs145560635
532	18:19911690:A:G	rs867939	18	19911690	4.45057e-17	19848836	19913064	91	79	3	1	rs867939
533	18:21090023:A:G	rs1788808	18	21090023	5.12176e-12	20716014	21165409	104	75	3	2	rs9962540;rs1788808
534	18:40736206:A:C	rs1518146	18	40736206	3.26917e-09	40665090	40868373	199	167	2	1	rs1518146
535	18:42230172:A:C	rs4890487	18	42230172	8.49265e-09	42230172	42230172	1	1	1	1	rs4890487
536	18:47168648:A:G	rs6507938	18	47168648	1.08274e-28	46578242	47698555	227	191	25	6	rs2000813;rs74558535;rs77960347;rs6507938;rs12965067;rs150342704
537	18:53210302:G:T	rs613872	18	53210302	3.20445e-10	53170871	53450864	23	21	2	1	rs613872
538	18:56118358:C:T	rs41292412	18	56118358	2.77786e-19	56089858	56232799	5	5	3	1	rs41292412
539	18:57861961:A:G	rs1457489	18	57861961	3.36374e-27	57676909	58088946	451	368	19	4	rs1893514;rs1457489;rs75105053;rs78138914
540	18:60845884:C:T	rs12454712	18	60845884	6.53996e-17	60845884	60878883	34	31	2	1	rs12454712
541	19:1175841:A:G	rs4807644	19	1175841	3.27026e-08	1156853	1188382	46	34	3	1	rs4807644
542	19:2089697:G:T	rs138274777	19	2089697	4.44466e-09	2076974	2089697	2	2	1	1	rs138274777
543	19:4028783:C:T	rs2289863	19	4028783	5.61369e-12	3995201	4189513	108	73	12	6	rs2289863;rs116790525;rs350833;rs2289860;rs164632;rs72978958
544	19:4966041:C:T	rs35502362	19	4966041	3.72423e-10	4944555	5022857	23	14	1	1	rs35502362
545	19:7220013:C:G	rs62112763	19	7220013	2.57998e-33	7125518	7298592	247	182	23	7	rs1799816;rs141368382;rs74638767;rs12609995;rs62112763;rs74176220;rs8101064
546	19:8429323:A:G	rs116843064	19	8429323	1.03605e-191	7880469	8829627	743	540	60	12	rs3745383;rs2115107;rs576593159;rs11880745;rs111712708;rs4044548;rs111500536;rs116843064;rs2967614;rs12976739;rs4804311;rs7253583
547	19:11293642:A:G	rs17616620	19	11293642	2.04521e-17	11258593	11348521	109	77	6	3	rs12984037;rs17616620;rs138572354
548	19:15307355:G:T	rs34547756	19	15307355	3.37522e-10	15281386	15315478	14	10	1	1	rs34547756
549	19:18397788:A:G	rs12463315	19	18397788	1.58318e-12	18343185	18408519	113	87	3	1	rs12463315
550	19:19379549:C:T	rs58542926	19	19379549	5.90595e-122	19063559	20479901	645	483	43	11	rs116962777;rs11085256;rs112923502;rs58542926;rs188247550;rs548311946;rs117970794;rs111406374;rs570408424;rs11668053;rs190050765
551	19:24495748:G:T	rs142553391	19	24495748	1.79945e-15	24495748	24495748	1	1	1	1	rs142553391
552	19:28718011:G:T	rs180994968	19	28718011	4.3261e-09	28671310	28718011	2	1	1	1	rs180994968
553	19:33891013:A:T	rs62102718	19	33891013	3.17805e-35	33709174	34044856	390	326	30	7	rs8110876;rs17694094;rs73024215;rs56361048;rs62102718;rs7257083;rs1156846
554	19:35551428:A:C	rs58895965	19	35551428	1.11396e-17	35537706	35566151	60	47	5	2	rs58895965;rs1672991
555	19:38950393:A:G	rs73930587	19	38950393	5.91032e-11	38732583	38953244	42	33	3	2	rs57822461;rs73930587
556	19:40480621:C:T	rs201611854	19	40480621	1.78416e-13	40409722	40753001	5	4	2	2	rs201611854;rs138750865
557	19:41739254:C:T	rs67033402	19	41739254	1.65425e-10	41663711	41969706	53	25	3	2	rs67033402;rs35538872
558	19:44153100:A:G	rs4760	19	44153100	1.99586e-13	44110325	44153100	11	10	3	1	rs4760
559	19:45416178:G:T	rs483082	19	45416178	0	45264319	45812354	459	350	73	28	rs112450640;rs139997344;rs28399607;rs147711004;rs57537848;rs141984622;rs151073910;rs12978931;rs11673139;rs79701229;rs283814;rs117310449;rs35568738;rs769446;rs483082;rs1064725;rs144311893;rs117664574;rs60049679;rs5112;rs141441332;rs71352241;rs138692741;rs2376867;rs114248186;rs62117257;rs11083761;rs12971645
560	19:46398989:A:G	rs34934360	19	46398989	1.77505e-17	46147527	46499537	135	95	7	4	rs4802269;rs2238689;rs34934360;rs6509245
561	19:46868385:A:G	rs62136106	19	46868385	1.11657e-09	46847901	46894786	23	22	1	1	rs62136106
562	19:47569003:A:G	rs3810291	19	47569003	1.69523e-18	47542060	47707427	109	65	5	1	rs3810291
563	19:49259529:A:G	rs838133	19	49259529	1.00491e-24	49168942	49279628	153	126	11	2	rs838133;rs62132810
564	19:50016759:C:T	rs142385484	19	50016759	1.55375e-09	49970793	50138023	61	47	3	2	rs142385484;rs10421333
565	19:53601172:C:T	rs11670364	19	53601172	5.51181e-09	53584736	53622404	13	9	1	1	rs11670364
566	19:54800500:A:G	rs367070	19	54800500	2.40659e-24	54752217	54837635	121	81	10	2	rs12975366;rs367070
567	19:56102362:A:G	rs12610709	19	56102362	8.55514e-18	56076834	56225150	77	59	6	1	rs12610709
568	19:56681485:C:T	rs139722045	19	56681485	4.29766e-08	56681485	56681485	1	1	1	1	rs139722045
569	19:57488423:C:T	rs8102873	19	57488423	9.323e-15	57480893	57509156	31	21	3	1	rs8102873
570	20:571467:A:C	rs144033177	20	571467	6.61485e-16	555352	571467	3	3	2	2	rs282146;rs144033177
571	20:1408919:C:T	rs6074626	20	1408919	3.63274e-08	1391436	1441841	5	5	1	1	rs6074626
572	20:4580888:C:T	rs6084805	20	4580888	1.38374e-09	3589411	5422857	49	30	2	2	rs11698381;rs6084805
573	20:13341567:A:G	rs189985824	20	13341567	7.15486e-16	13341567	13341567	1	1	1	1	rs189985824
574	20:26285360:C:G	rs138412739	20	26285360	3.35188e-16	25404795	26285360	9	5	2	1	rs138412739
575	20:30223438:C:T	rs6579238	20	30223438	1.05601e-09	29805207	30449325	328	255	3	1	rs6579238
576	20:32905161:G:T	rs6088461	20	32905161	9.25671e-14	31966698	33529766	575	414	7	2	rs149142833;rs6088461
577	20:38555808:A:G	rs2208649	20	38555808	4.07675e-10	38508191	38570656	27	23	2	1	rs2208649
578	20:39142516:A:G	rs2207132	20	39142516	2.89898e-12	38904203	39234223	241	201	3	3	rs8119759;rs2207132;rs2865505
579	20:39856080:A:C	rs6102309	20	39856080	3.06803e-10	39656342	39974316	153	120	3	1	rs6102309
580	20:44551855:C:T	rs6073958	20	44551855	8.57744e-206	42848844	45606853	1609	1246	106	32	rs2251358;rs2743389;rs78852634;rs3092744;rs16990165;rs3746592;rs2272953;rs6073753;rs980984;rs74174966;rs197674;rs113775752;rs147236514;rs11086985;rs11569671;rs148773337;rs6073958;rs62213343;rs190540063;rs117132825;rs17448653;rs145802687;rs143491521;rs144858460;rs12373874;rs2297199;rs56050009;rs6032681;rs8124302;rs6124885;rs4809604;rs55966194
581	20:46340974:A:G	rs6018652	20	46340974	2.00523e-15	46338017	46342197	5	5	1	1	rs6018652
582	20:51235613:A:G	rs6068280	20	51235613	3.71575e-13	50914231	51264331	387	295	3	1	rs6068280
583	20:51699817:C:T	rs1936963	20	51699817	3.72085e-09	51691989	51725445	15	15	2	2	rs1892204;rs1936963
584	20:55836040:A:G	rs6123685	20	55836040	1.60988e-17	55836040	56156003	107	92	10	3	rs6123685;rs2236744;rs2143666
585	20:56809652:C:T	rs619838	20	56809652	8.54862e-09	56798017	56861637	31	25	1	1	rs619838
586	20:57466093:G:T	rs185799410	20	57466093	4.96886e-12	57434900	57466093	5	4	1	1	rs185799410
587	20:59895665:A:G	rs141846862	20	59895665	1.78127e-18	59895665	59895665	1	1	1	1	rs141846862
588	20:62711459:C:T	rs8126001	20	62711459	2.43055e-15	62131304	62756522	125	90	8	5	rs1574387;rs369156431;rs1151625;rs8115058;rs8126001
589	21:16422603:C:T	rs2223041	21	16422603	1.97376e-11	16329277	16438079	75	66	7	2	rs78396478;rs2223041
590	21:16866058:C:T	rs9977554	21	16866058	5.67751e-10	16843097	16867882	25	18	1	1	rs9977554
591	21:27226107:C:T	rs143398227	21	27226107	2.53909e-08	27199232	27226107	3	2	1	1	rs143398227
592	21:36787649:A:G	rs139351057	21	36787649	3.42997e-08	36159779	37715242	16	1	1	1	rs139351057
593	21:40553845:C:T	rs6517522	21	40553845	6.53781e-10	40512918	40719241	379	276	3	1	rs6517522
594	22:24338936:C:T	rs2262477	22	24338936	8.83772e-09	24241101	24403541	130	58	1	1	rs2262477
595	22:29453193:C:G	rs12321	22	29453193	2.99233e-08	29448643	29455687	16	9	1	1	rs12321
596	22:30112364:C:T	rs737932	22	30112364	3.83902e-11	29889324	30594803	362	279	5	1	rs737932
597	22:36042986:C:T	rs9610329	22	36042986	1.03598e-10	36029739	36042986	12	7	1	1	rs9610329
598	22:38600542:C:T	rs2267373	22	38600542	2.33247e-42	38449394	39159724	670	516	19	4	rs5750539;rs2267373;rs75520567;rs2071887
599	22:43169089:A:G	rs113304833	22	43169089	9.75203e-12	43169089	43169089	1	1	1	1	rs113304833
600	22:46393198:A:G	rs138792958	22	46393198	9.92484e-17	46375734	46818129	351	281	8	2	rs138792958;rs6008762
601	22:50308444:A:C	rs12167279	22	50308444	2.20899e-09	50176030	50317410	6	3	1	1	rs12167279
Abbreviations: CPASSOC, cross-phenotype association analysis; GWAS, genome-wide association study; IR, insulin resistance; SNP, single nucleotide polymorphism.

## Sheet: ST5
Supplementary Table 5. 217 independent genome-wide significant signals associated with mvIR
Independent genome-wide significant signals associated with mvIR were defined as those achieving genome-wide significance (P<5×10-8) across all NGWAMA, MTAG, and CPASSOC. Novel loci were defined as lead SNPs located more than 1000-kb away from any of the genomic loci identified in the original single-trait GWASs comprising the mvIR (HOMA-IR, ISI, Fins, and TG:HDL-C). Nearest gene(s), closest gene…
GenomicLocus	uniqID	rsID	Chromosome	Position	P value	start	end	N SNPs	N GWAS SNPs	N Ind Sig SNPs	N Lead SNPs	Lead SNPs	Novel loci	Nearest gene
1	1:15874158:A:C	rs11585044	1	15874158	2.65135e-11	15803338	16046109	160	34	1	1	rs11585044	Yes	DNAJC16
2	1:27180088:A:C	rs75460349	1	27180088	2.76616e-45	26933591	27368126	276	169	5	2	rs75460349;rs12758606	No	ZDHHC18
3	1:40035928:G:T	rs3768321	1	40035928	6.3309e-49	39550621	40441964	584	366	19	3	rs3768321;rs72665235;rs61781290	No	PABPC4
4	1:50852249:A:G	rs2784135	1	50852249	4.64226e-16	50828316	51532590	501	291	2	2	rs2784135;rs138422027	No	DMRTA2
5	1:62911341:C:T	rs598253	1	62911341	1.10014e-87	62834094	63358816	629	407	13	1	rs598253	No	USP1
6	1:93839608:G:T	rs35628716	1	93839608	8.07125e-18	93539383	93891839	256	33	2	1	rs35628716	No	DR1
7	1:109821307:G:T	rs583104	1	109821307	1.50501e-16	109816863	109822166	12	10	1	1	rs583104	No	PSRC1
8	1:110497808:A:G	rs61785481	1	110497808	7.9153e-15	110470764	110504663	14	11	2	1	rs61785481	No	CSF1
9	1:149869351:A:G	rs6587680	1	149869351	1.90391e-16	149729337	149997588	189	79	1	1	rs6587680	No	BOLA1
10	1:154254317:A:G	rs12135346	1	154254317	1.26543e-14	154239334	154260361	12	5	1	1	rs12135346	No	HAX1
11	1:172360164:A:G	rs2227198	1	172360164	5.79336e-19	172302544	172453840	110	61	5	1	rs2227198	No	DNM3
12	1:203518382:C:T	rs2821231	1	203518382	3.58602e-15	203507163	203540591	29	1	1	1	rs2821231	No	OPTC
13	1:205041542:C:T	rs3903399	1	205041542	1.94832e-13	205012106	205268803	177	42	5	2	rs3903399;rs9659978	No	CNTN2
14	1:219668252:A:C	rs1538742	1	219668252	3.95792e-42	219268532	219798632	399	269	26	4	rs1531088;rs1538742;rs76926608;rs11118352	No	NA
15	1:220970028:A:G	rs2642438	1	220970028	1.21935e-16	220970028	221197094	8	2	2	2	rs2642438;rs61819230	No	MARC1
16	1:228076739:C:T	rs878811	1	228076739	4.42165e-14	228056868	228088833	11	9	1	1	rs878811	No	WNT9A
17	1:230301811:G:T	rs11122450	1	230301811	1.87879e-168	230231256	230436175	230	171	23	6	rs12086347;rs115047514;rs35498929;rs11122450;rs58680978;rs2273967	No	GALNT2
18	2:3642361:C:T	rs3820897	2	3642361	3.78881e-21	3632442	3648186	16	6	1	1	rs3820897	No	COLEC11
19	2:21221035:A:C	rs4665710	2	21221035	2.51882e-184	20878719	21435616	382	210	32	5	rs12624282;rs36177368;rs17397826;rs4665710;rs34468875	No	APOB
20	2:25512438:G:T	rs12999687	2	25512438	1.38943e-11	25510276	25584162	27	3	3	1	rs12999687	No	DNMT3A
21	2:26098259:A:C	rs34820121	2	26098259	8.55981e-17	25901513	26106314	254	143	3	1	rs34820121	No	ASXL2
22	2:26929282:G:T	rs13394970	2	26929282	1.39855e-12	26911509	26932796	19	9	1	1	rs13394970	No	KCNK3
23	2:27598097:C:T	rs4665972	2	27598097	3.3199e-184	27189063	28560600	956	497	38	9	rs6714780;rs72808908;rs934986;rs1275519;rs4665972;rs115961201;rs58199976;rs898031;rs79468673	No	SNX17
24	2:48962291:G:T	rs17326656	2	48962291	8.9189e-15	48962291	48996683	6	1	1	1	rs17326656	No	LHCGR, STON1-GTF2A1L
25	2:65287896:A:G	rs2249105	2	65287896	2.25342e-27	65235333	65386462	146	91	5	1	rs2249105	No	CEP68
26	2:111873378:C:T	rs4627572	2	111873378	2.72655e-12	111863438	111941995	93	29	2	2	rs4627572;rs17041868	No	ACOXL
27	2:121308660:G:T	rs7578604	2	121308660	3.34812e-15	121306758	121449337	33	25	4	2	rs7578604;rs10864859	No	LINC01101
28	2:135268836:A:G	rs60802178	2	135268836	6.26806e-14	135240497	135280758	66	39	1	1	rs60802178	No	TMEM163
29	2:165528876:C:T	rs13389219	2	165528876	1.36133e-116	165315760	165828042	574	278	33	8	rs10191695;rs12476322;rs13389219;rs115631825;rs113238768;rs355863;rs10930140;rs10180709	No	COBLL1
30	2:171632225:C:T	rs17694506	2	171632225	8.40148e-12	171570488	171680587	116	2	1	1	rs17694506	No	ERICH2
31	2:219590348:A:G	rs148358468	2	219590348	1.50872e-22	219052546	219678421	747	477	9	3	rs6707559;rs2303566;rs148358468	No	TTLL4
32	2:220101974:A:G	rs61733623	2	220101974	2.7392e-15	220101974	220183796	2	1	1	1	rs61733623	No	GLB1L
33	2:227095159:C:T	rs2138161	2	227095159	4.84126e-141	226813090	227659583	875	534	39	11	rs6436586;rs34954697;rs72979712;rs1522802;rs114584605;rs55726223;rs2138161;rs115420636;rs71429196;rs77402945;rs12052364	No	IRS1
34	3:12396913:A:G	rs71304101	3	12396913	8.49023e-45	12026207	12501943	499	304	18	4	rs2618400;rs2347101;rs71304101;rs3103310	No	PPARG
35	3:15881120:A:G	rs12691219	3	15881120	5.86895e-14	15535910	15964140	356	142	4	1	rs12691219	No	ANKRD28
36	3:47914974:C:T	rs7638388	3	47914974	9.67903e-12	46925539	48322023	442	10	4	2	rs11926707;rs7638388	Yes	MAP4
37	3:49884913:C:T	rs13316065	3	49884913	1.7295e-18	49669948	50209053	389	175	5	1	rs13316065	No	TRAIP
38	3:52490391:A:G	rs34261027	3	52490391	2.20791e-39	52213653	53174745	724	449	16	4	rs34261027;rs67409736;rs35333155;rs11713926	No	NISCH
39	3:71643451:C:T	rs830663	3	71643451	1.84802e-12	71640776	71684845	48	3	1	1	rs830663	No	FOXP1
40	3:87037543:A:G	rs13066793	3	87037543	2.08779e-12	87037543	87037543	1	1	1	1	rs13066793	Yes	VGLL3
41	3:135955604:C:T	rs895893	3	135955604	5.32729e-40	135620045	136669079	875	358	13	2	rs36060212;rs895893	No	PCCB
42	3:150074251:A:G	rs11929253	3	150074251	2.25722e-14	150018637	150239030	50	23	5	2	rs62271362;rs11929253	No	LINC01214
43	3:171800256:A:G	rs4894803	3	171800256	1.20886e-10	171759410	171833266	6	1	1	1	rs4894803	No	FNDC3B
44	4:965720:A:G	rs13101828	4	965720	8.52137e-12	953193	983809	21	1	1	1	rs13101828	No	DGKQ
45	4:3443931:A:G	rs13108218	4	3443931	4.66799e-25	3281369	3536329	215	106	20	3	rs2051559;rs13108218;rs7676662	No	HGFAC
46	4:4990298:A:G	rs4450871	4	4990298	1.99771e-18	4990298	4990298	1	1	1	1	rs4450871	No	CYTL1
47	4:18027696:A:G	rs112675878	4	18027696	6.22116e-21	17785322	18049216	375	207	4	2	rs2074974;rs112675878	No	LCORL
48	4:26065924:C:T	rs12513287	4	26065924	1.35103e-27	26006133	26128710	89	63	6	1	rs12513287	No	SMIM20
49	4:38659594:A:G	rs34722008	4	38659594	1.09255e-10	38577660	38716721	40	8	1	1	rs34722008	No	KLF3-AS1
50	4:55521017:A:G	rs2159935	4	55521017	9.69047e-14	55487718	55539264	73	5	1	1	rs2159935	No	KIT
51	4:77411101:A:C	rs10029860	4	77411101	6.82622e-13	77362445	77414988	41	13	1	1	rs10029860	No	SHROOM3
52	4:88018991:A:G	rs2035403	4	88018991	3.93671e-47	87216986	88286354	754	343	26	2	rs2035403;rs7440770	No	AFF1
53	4:89741269:A:G	rs3822072	4	89741269	2.04286e-22	89619723	89796154	134	78	4	2	rs3822072;rs4425336	No	FAM13A
54	4:103188709:C:T	rs13107325	4	103188709	9.18153e-28	102702364	103387161	30	16	4	1	rs13107325	No	SLC39A8
55	4:110569620:C:T	rs78025076	4	110569620	7.2248e-16	110465025	110569620	2	2	1	1	rs78025076	No	CCDC109B
56	4:157683685:C:T	rs1425486	4	157683685	3.28734e-21	157611192	157814489	213	146	5	1	rs1425486	No	PDGFC
57	5:53300662:A:G	rs4311394	5	53300662	9.75669e-21	53271420	53344452	164	84	5	1	rs4311394	No	ARL15
58	5:55861464:C:T	rs28650790	5	55861464	1.57475e-95	55763382	56274146	489	232	36	10	rs12657780;rs40270;rs154256;rs71624136;rs3907158;rs456605;rs188010585;rs28650790;rs6450394;rs832537	No	C5orf67
59	5:67714246:A:G	rs4976033	5	67714246	1.27837e-27	67673635	67715161	17	9	2	1	rs4976033	No	PIK3R1
60	5:78471854:C:T	rs10044259	5	78471854	8.29782e-15	78416416	78628979	244	132	1	1	rs10044259	No	NA
61	5:82815158:A:G	rs115912456	5	82815158	3.47911e-13	82810884	82815170	3	3	1	1	rs115912456	No	VCAN
62	5:112388225:C:T	rs6594665	5	112388225	8.82161e-10	112379659	112395949	21	1	1	1	rs6594665	Yes	MCC
63	5:118728256:A:G	rs7720409	5	118728256	2.16721e-27	118676878	118789338	82	41	5	1	rs7720409	No	TNFAIP8
64	5:131320462:C:T	rs253942	5	131320462	7.63884e-14	130397106	131320462	49	23	2	1	rs253942	No	ACSL6
65	5:132444128:A:G	rs72801474	5	132444128	1.79324e-16	132349654	132467373	7	4	1	1	rs72801474	No	HSPA4
66	5:157989980:C:T	rs2914221	5	157989980	1.54268e-30	157881647	158058432	232	105	7	2	rs10036930;rs2914221	No	EBF1
67	5:173353514:C:T	rs747472	5	173353514	8.52431e-12	173269956	173393823	88	48	1	1	rs747472	Yes	CPEB4
68	6:20502195:C:T	rs62398908	6	20502195	1.26993e-12	20483407	20522290	14	1	1	1	rs62398908	No	E2F3
69	6:34192036:A:C	rs114760566	6	34192036	2.80727e-31	34067732	35383027	329	68	11	2	rs1592269;rs114760566	No	HMGA1,MIR6835
70	6:36646788:A:G	rs3176320	6	36646788	1.53172e-11	36629444	36648816	20	5	1	1	rs3176320	Yes	CDKN1A
71	6:43757896:A:C	rs998584	6	43757896	2.9018e-120	43749110	43829941	124	52	14	4	rs10434;rs998584;rs10948097;rs1317983	No	VEGFA
72	6:55437238:C:T	rs73744635	6	55437238	2.69992e-12	55436342	55459912	11	8	1	1	rs73744635	Yes	HMGCLL1
73	6:107441753:A:G	rs11153046	6	107441753	7.92192e-13	107422239	107445266	19	11	1	1	rs11153046	No	BEND3
74	6:109229880:A:G	rs2491086	6	109229880	1.84602e-15	109160380	109271201	95	63	1	1	rs2491086	No	ARMC2,ARMC2-AS1
75	6:127454893:A:G	rs72959041	6	127454893	1.25127e-35	126659043	127532807	523	226	10	4	rs9388487;rs987763;rs1936805;rs72959041	No	RSPO3
76	6:130354855:C:T	rs9388766	6	130354855	2.35519e-19	130321899	130460244	167	110	7	1	rs9388766	No	L3MBTL3
77	6:139831981:C:T	rs635769	6	139831981	3.65511e-60	139805476	139844673	98	62	10	2	rs3010285;rs635769	No	LOC645434
78	6:161092438:C:T	rs11751347	6	161092438	4.15974e-38	160514283	161125631	125	68	9	4	rs55730499;rs140570886;rs11751347;rs7758766	No	LPA
79	6:163740089:A:G	rs6927207	6	163740089	4.02264e-13	163736204	163745411	20	7	1	1	rs6927207	No	PACRG-AS1
80	6:164133001:C:T	rs4709746	6	164133001	5.79714e-24	164092291	164133001	10	8	2	1	rs4709746	No	QKI
81	7:1006128:C:T	rs34082940	7	1006128	3.08222e-14	996645	1219553	79	33	5	1	rs34082940	No	COX19
82	7:15893576:C:T	rs38172	7	15893576	7.26304e-11	15883394	15899730	20	3	1	1	rs38172	Yes	LOC101927524
83	7:17284577:C:T	rs4410790	7	17284577	1.20559e-17	17281007	17309279	13	3	1	1	rs4410790	No	AHR
84	7:17920613:C:T	rs10242866	7	17920613	3.77751e-24	17768277	18032241	388	176	10	1	rs10242866	No	SNX13
85	7:25997536:A:G	rs4719841	7	25997536	3.02819e-28	25850464	26034676	231	113	11	3	rs2893221;rs4722551;rs4719841	No	MIR148A
86	7:26397239:A:C	rs1534696	7	26397239	3.07105e-23	26309246	26397239	66	4	3	1	rs1534696	No	SNX10
87	7:28256240:A:G	rs498475	7	28256240	4.03599e-12	28142088	28256240	26	8	2	1	rs498475	No	JAZF1-AS1
88	7:73037366:A:G	rs55747707	7	73037366	5.35471e-242	72129667	73504110	653	313	33	8	rs147598130;rs113452856;rs117624871;rs7799778;rs799158;rs55747707;rs10246419;rs145743281	No	MLXIPL
89	7:74118079:C:T	rs113667755	7	74118079	2.98296e-11	74002323	74325004	38	2	1	1	rs113667755	No	GTF2I,LOC101926943
90	7:77417584:C:T	rs1544459	7	77417584	2.49493e-10	77305841	77606013	180	7	1	1	rs1544459	Yes	TMEM60
91	7:130430969:C:T	rs10260148	7	130430969	5.28101e-53	130422934	130468190	91	63	3	1	rs10260148	No	KLF14
92	7:150216171:G:T	rs35241484	7	150216171	3.8912e-20	150179028	150542711	416	184	5	2	rs35241484;rs62492368	No	GIMAP7
93	8:9173358:A:G	rs7012814	8	9173358	6.511e-65	8088230	12199830	6283	3151	351	25	rs1878561;rs11989653;rs1814796;rs10503388;rs17149592;rs76448484;rs7012814;rs2169387;rs56413145;rs77705851;rs73204606;rs587059;rs7831557;rs56062414;rs11774792;rs9657541;rs79107778;rs78800805;rs73201420;rs7386288;rs66566471;rs34421088;rs8191515;rs28378644;rs146943626	No	LOC157273
94	8:12632903:G:T	rs4474021	8	12632903	2.3064e-16	12617857	12649168	21	13	1	1	rs4474021	No	LOC340357
95	8:18272535:C:T	rs35246381	8	18272535	2.59384e-29	18239697	18291590	74	51	2	1	rs35246381	No	NAT2
96	8:19874145:C:T	rs4922118	8	19874145	0	18754390	20442964	1268	679	142	39	rs4921669;rs10503660;rs75466392;rs6586863;rs111251122;rs148339574;rs10112650;rs191147541;rs3899015;rs3758060;rs117860853;rs148383135;rs7835544;rs3898938;rs141522237;rs148048657;rs117521017;rs34761945;rs74304285;rs268;rs144578061;rs308;rs9644636;rs80085105;rs74779858;rs142288236;rs7005359;rs75609851;rs4922118;rs185033560;rs34266755;rs28597716;rs73667496;rs28742908;rs77675968;rs16842;rs112089990;rs…	No	LPL
97	8:23609009:G:T	rs6983481	8	23609009	1.80099e-13	23572963	23617879	49	23	1	1	rs6983481	No	NKX2-6
98	8:36846109:C:T	rs7816345	8	36846109	4.98447e-13	36658914	36859186	50	11	1	1	rs7816345	Yes	KCNU1
99	8:37399290:A:G	rs2407278	8	37399290	1.10489e-10	37389122	37405377	7	1	1	1	rs2407278	Yes	ZNF703
100	8:72469742:A:G	rs4738141	8	72469742	6.52809e-18	72395582	72531550	83	58	4	1	rs4738141	No	EYA1
101	8:103873091:A:G	rs1991928	8	103873091	3.24368e-11	103816785	103926197	60	1	1	1	rs1991928	Yes	AZIN1
102	8:116639462:G:T	rs2737225	8	116639462	3.65828e-22	116464988	116700003	191	145	3	1	rs2737225	No	TRPS1
103	8:126506694:A:G	rs112875651	8	126506694	0	126419938	126650058	406	248	44	13	rs2980874;rs62521034;rs2980883;rs112875651;rs7012891;rs34529435;rs78309295;rs139768754;rs62523889;rs1963945;rs10110589;rs139020749;rs12549603	No	TRIB1
104	9:1033958:C:T	rs1509195	9	1033958	3.70796e-20	1032567	1055533	36	21	4	2	rs1509195;rs1509202	No	LINC01230
105	9:16901067:A:C	rs62543565	9	16901067	1.29645e-14	16845726	16913836	58	33	2	1	rs62543565	Yes	BNC2
106	9:86583076:C:T	rs696825	9	86583076	3.23302e-13	86368660	86661654	95	3	1	1	rs696825	No	HNRNPK,MIR7-1
107	9:95382297:C:T	rs12686780	9	95382297	1.97677e-16	94939154	95576781	193	97	3	1	rs12686780	No	IPPK, LOC100128361
108	9:107589255:C:T	rs2066718	9	107589255	1.03822e-13	107585213	107688297	10	4	2	2	rs2066718;rs10820747	No	ABCA1
109	9:117098650:C:T	rs1044531	9	117098650	2.44829e-16	117098650	117098650	1	1	1	1	rs1044531	No	AKNA
110	9:119258187:C:T	rs767432	9	119258187	1.47705e-11	119245183	119258187	18	10	1	1	rs767432	Yes	ASTN2
111	10:65133822:A:G	rs7923609	10	65133822	2.39701e-44	64761091	65400352	888	375	15	1	rs7923609	No	JMJD1C
112	10:77257791:G:T	rs4617527	10	77257791	1.40715e-10	77217080	77372699	64	1	1	1	rs4617527	Yes	LOC101929234
113	10:89791686:C:T	rs7910126	10	89791686	2.88831e-14	89548270	89901708	103	56	6	2	rs10490920;rs7910126	No	PTEN
114	10:94839724:G:T	rs4418728	10	94839724	4.56049e-35	94506628	95357918	318	147	16	4	rs2497337;rs4418728;rs1222925;rs113344423	No	CYP26A1
115	10:99772190:C:T	rs565108	10	99772190	3.8063e-15	99694970	99784552	40	6	2	1	rs565108	No	CRTAC1
116	10:113922728:A:G	rs2803611	10	113922728	2.3587e-32	113901194	114050642	195	107	6	2	rs2803611;rs2419605	No	GPAM
117	10:115798895:A:G	rs2773469	10	115798895	7.86895e-17	115789375	115805056	5	4	1	1	rs2773469	No	ADRB1
118	10:122999550:A:G	rs878409	10	122999550	2.34628e-13	122978944	123000638	33	25	1	1	rs878409	No	MIR5694
119	11:10675738:A:G	rs10840457	11	10675738	3.63961e-14	10655623	10699750	31	13	1	1	rs10840457	No	MRVI1
120	11:13355770:C:T	rs6486121	11	13355770	3.56844e-16	13354509	13370535	13	10	1	1	rs6486121	No	ARNTL
121	11:14950889:C:T	rs117776155	11	14950889	5.66794e-12	14528011	15057986	3	1	1	1	rs117776155	No	CALCA,CYP2R1
122	11:26279749:C:T	rs1381187	11	26279749	1.83057e-11	26167547	26281664	39	13	1	1	rs1381187	No	ANO3
123	11:47268550:G:T	rs7129661	11	47268550	2.44556e-57	45766184	51570078	2325	630	35	8	rs11038647;rs77756595;rs116969407;rs7129661;rs11570051;rs138296701;rs3884997;rs139917442	No	ACP2
124	11:61592362:A:G	rs174566	11	61592362	6.06005e-131	61531443	61678754	226	159	25	5	rs628993;rs174566;rs174569;rs73487492;rs7394871	No	FADS2
125	11:62328854:A:G	rs11231145	11	62328854	4.87693e-17	62309787	62418921	83	37	1	1	rs11231145	No	EEF1G
126	11:64031241:C:T	rs35169799	11	64031241	6.38511e-44	63843031	64318347	64	41	9	1	rs35169799	No	PLCB3
127	11:64803351:A:G	rs562590	11	64803351	1.02519e-22	64791585	64851305	48	36	1	1	rs562590	No	ARL2-SNX15,SNX15
128	11:65473798:A:C	rs10750766	11	65473798	3.21417e-23	65351074	65566719	87	48	8	1	rs10750766	No	KAT5
129	11:66066993:G:T	rs4930352	11	66066993	1.23094e-14	66064821	66182450	30	8	3	1	rs4930352	No	TMEM151A
130	11:69301859:C:T	rs6606645	11	69301859	1.20996e-10	69285740	69307444	9	4	1	1	rs6606645	No	CCND1
131	11:109979945:C:T	rs10789752	11	109979945	2.65803e-11	109959102	110016032	90	1	1	1	rs10789752	No	ZC3H12C
132	11:111458659:C:T	rs117869718	11	111458659	5.624e-14	111347680	111952183	25	3	1	1	rs117869718	No	SIK2
133	11:116581259:C:T	rs61905072	11	116581259	0	115395554	117559653	2194	1016	164	40	rs12280893;rs17119701;rs1508103;rs883863;rs139118317;rs61362984;rs61906060;rs11216058;rs74948313;rs2187125;rs516226;rs486394;rs74792494;rs1145210;rs61905072;rs141414463;rs193108398;rs17519079;rs1268353;rs113271699;rs3135507;rs75919952;rs35412484;rs75542613;rs12721041;rs12721078;rs2070665;rs71480323;rs77586292;rs10892074;rs140707095;rs4938341;rs2509209;rs187929675;rs117117915;rs112357006;rs6083724…	No	BUD13
134	11:118928253:C:T	rs2509121	11	118928253	2.18892e-17	118913993	118958869	54	33	1	1	rs2509121	No	HYOU1
135	12:4316171:A:G	rs75616205	12	4316171	1.71444e-12	4316171	4316171	1	1	1	1	rs75616205	No	CCND2
136	12:6690190:A:C	rs55670476	12	6690190	9.10142e-14	6663087	6739497	87	46	2	1	rs55670476	No	CHD4
137	12:20470199:A:G	rs11045171	12	20470199	5.47442e-35	20392267	20592624	85	32	7	4	rs1373571;rs11045171;rs12369443;rs7134150	No	PDE3A
138	12:26463082:C:T	rs11048456	12	26463082	2.85278e-21	26281858	26532354	93	31	3	2	rs748775;rs11048456	No	ITPR2
139	12:54425000:G:T	rs56270790	12	54425000	3.86374e-13	54417525	54445218	36	18	1	1	rs56270790	Yes	HOXC4,HOXC5
140	12:56470625:C:T	rs11171739	12	56470625	1.68357e-10	56368078	56584247	58	6	2	1	rs11171739	Yes	ERBB3
141	12:57219622:C:T	rs61937819	12	57219622	3.14389e-11	57116249	57233350	21	5	1	1	rs61937819	No	HSD17B6
142	12:57843711:A:G	rs2229357	12	57843711	2.2694e-31	57558505	58318167	169	87	8	3	rs2943691;rs2229357;rs3741423	No	INHBC
143	12:65902265:C:T	rs145775785	12	65902265	3.35084e-11	65869436	65902265	2	1	1	1	rs145775785	No	LOC100507065
144	12:66359752:A:C	rs8756	12	66359752	5.78057e-15	66326943	66383320	25	11	2	1	rs8756	No	HMGA2
145	12:102880473:C:T	rs35766	12	102880473	2.535e-08	102394872	102914640	183	6	2	2	rs5009837;rs35766	No	IGF1
146	12:107205390:A:G	rs7977765	12	107205390	3.22539e-13	107156820	107290619	20	3	1	1	rs7977765	No	RIC8B
147	12:111932800:C:T	rs7137828	12	111932800	2.16746e-23	111708458	112906415	90	23	4	1	rs7137828	No	ATXN2
148	12:124409502:A:G	rs7133378	12	124409502	2.76222e-69	122282117	124812706	1863	645	73	17	rs35892692;rs28643366;rs116896792;rs3104614;rs12313006;rs80172058;rs73230058;rs10773000;rs143928387;rs6488898;rs4930731;rs34934281;rs7133378;rs57818143;rs825452;rs11057457;rs143786003	No	DNAH10
149	12:125265201:A:G	rs921919	12	125265201	1.4533e-23	125259562	125380232	49	20	7	3	rs921919;rs61941676;rs111929233	No	SCARB1
150	13:50655989:G:T	rs41284816	13	50655989	1.93479e-14	50436185	50729244	64	29	2	1	rs41284816	No	DLEU2
151	13:74146049:C:T	rs4885108	13	74146049	2.01377e-13	74104887	74196887	95	54	3	1	rs4885108	Yes	LINC00392
152	13:114544024:C:T	rs7140110	13	114544024	8.19669e-23	114541617	114840131	184	44	6	2	rs7140110;rs75073260	No	GAS6, GAS6-AS1
153	14:52480621:A:G	rs6572807	14	52480621	2.86884e-12	52480621	52497383	15	3	1	1	rs6572807	No	NID2
154	14:69142390:A:G	rs4902630	14	69142390	7.18033e-11	69138371	69148778	9	2	1	1	rs4902630	Yes	RAD51B
155	14:71541026:C:T	rs2240533	14	71541026	3.73208e-16	71350617	71613451	315	112	3	1	rs2240533	Yes	PCNX
156	14:77518204:C:T	rs61991652	14	77518204	9.3145e-12	77497368	77529375	15	1	1	1	rs61991652	Yes	LOC283575
157	15:39444679:G:T	rs275184	15	39444679	7.34178e-16	39444679	39668870	33	13	2	2	rs275184;rs28790585	No	C15orf54
158	15:41888918:A:G	rs7170463	15	41888918	4.95399e-19	41800652	42145936	141	65	3	1	rs7170463	No	TYRO3
159	15:44027885:C:T	rs139974673	15	44027885	4.89172e-100	42438962	44947434	702	205	17	3	rs184334219;rs62019360;rs139974673	No	CATSPER2P1
160	15:58674051:A:G	rs62001736	15	58674051	1.293e-14	58671721	58683366	17	3	1	1	rs62001736	No	LIPC
161	15:61957236:A:G	rs3848125	15	61957236	1.20909e-16	61913884	62000727	62	25	3	1	rs3848125	No	VPS13C
162	15:63402735:C:T	rs2729784	15	63402735	7.33168e-24	63340292	63432133	194	119	7	1	rs2729784	No	LACTB
163	15:63792486:A:C	rs17184382	15	63792486	3.83796e-19	63781143	64173006	439	197	10	1	rs17184382	No	USP3
164	15:66872114:C:T	rs4776793	15	66872114	8.14121e-16	66861514	66884987	50	21	4	1	rs4776793	No	LINC01169
165	15:73618238:C:T	rs3826043	15	73618238	1.36372e-11	73431600	73627122	25	1	1	1	rs3826043	Yes	HCN4
166	16:1255832:C:T	rs35482321	16	1255832	5.92398e-11	1244631	1255885	15	2	1	1	rs35482321	No	CACNA1H
167	16:4677604:A:C	rs12921195	16	4677604	3.45554e-13	4677604	4677607	2	1	1	1	rs12921195	No	MGRN1
168	16:15150505:A:C	rs12928099	16	15150505	1.58408e-41	14475560	15642809	343	175	16	4	rs8048489;rs12926897;rs12928099;rs153805	No	PDXDC1
169	16:30011618:C:T	rs12921996	16	30011618	1.86105e-16	29924422	30117253	112	32	1	1	rs12921996	No	INO80E
170	16:56989830:A:G	rs12923459	16	56989830	0	56410722	57405159	574	357	84	30	rs146973531;rs1827210;rs72784753;rs75566930;rs76058070;rs189475016;rs62035923;rs11640954;rs148931404;rs3794655;rs72786761;rs12444708;rs9938160;rs12448528;rs147464145;rs12923459;rs4783961;rs289718;rs56208677;rs71387147;rs12708983;rs1800777;rs12720917;rs172337;rs289752;rs7187261;rs185197208;rs289727;rs79546662;rs4784775	No	CETP
171	16:67940350:A:G	rs55781197	16	67940350	3.57913e-19	67677001	68297928	398	217	2	1	rs55781197	No	PSKH1
172	16:72097827:C:T	rs3794695	16	72097827	2.35629e-22	71582994	72741267	134	65	8	2	rs3794695;rs34417180	No	HPR
173	16:81534790:C:T	rs2925979	16	81534790	5.07973e-59	81509452	81549708	60	33	7	1	rs2925979	No	CMIP
174	16:85150163:A:G	rs79311290	16	85150163	1.94671e-17	85150163	85157672	3	1	1	1	rs79311290	No	FAM92B
175	16:88003242:A:G	rs4843752	16	88003242	4.75809e-14	87984046	88117987	143	55	1	1	rs4843752	No	BANP
176	17:481604:C:T	rs11870735	17	481604	5.21367e-13	434610	617869	50	11	1	1	rs11870735	No	VPS53
177	17:7557834:C:T	rs1642764	17	7557834	4.70129e-15	7438783	7615476	77	17	7	2	rs1642764;rs7141	No	ATP1B2
178	17:17458353:A:G	rs7215055	17	17458353	5.3787e-21	17360050	18271522	619	203	14	4	rs1242503;rs7215055;rs12450799;rs2461838	No	PEMT
179	17:41926126:C:T	rs72836561	17	41926126	1.22336e-140	40571284	42005366	276	127	10	3	rs646123;rs72836561;rs72836567	No	CD300LG
180	17:42330122:C:T	rs1476512	17	42330122	1.06085e-11	42330122	42339424	4	1	1	1	rs1476512	No	SLC4A1
181	17:46197755:A:G	rs10775406	17	46197755	2.52505e-15	45949338	46554456	271	77	3	1	rs10775406	No	SNX11
182	17:46957987:A:G	rs595767	17	46957987	1.13229e-14	46957696	47047868	164	1	1	1	rs595767	No	ATP5G1
183	17:64210580:A:C	rs1801689	17	64210580	4.14621e-17	64195431	64305051	5	4	1	1	rs1801689	No	APOH
184	17:65887896:A:G	rs8079754	17	65887896	8.93506e-28	65764164	66098154	466	187	5	1	rs8079754	No	BPTF
185	17:68454400:A:G	rs9904355	17	68454400	2.91591e-12	68416552	68511145	54	25	1	1	rs9904355	No	NA
186	17:73374945:A:G	rs4789182	17	73374945	5.80559e-12	73249256	73408819	96	6	1	1	rs4789182	No	GRB2
187	17:74207943:A:G	rs56257305	17	74207943	5.85972e-15	74205149	74303832	113	50	2	2	rs56257305;rs193220	No	RNF157
188	17:76397334:A:C	rs12451715	17	76397334	1.28497e-21	76367182	76406402	87	52	2	1	rs12451715	No	PGS1
189	18:287534:A:G	rs6506032	18	287534	6.80879e-14	56596	294745	162	51	2	2	rs60205347;rs6506032	No	THOC1
190	18:2846499:C:T	rs3810068	18	2846499	2.78111e-11	2846499	2846812	2	1	1	1	rs3810068	No	EMILIN2
191	18:19905141:C:T	rs35321365	18	19905141	6.46138e-16	19848836	19913064	85	62	1	1	rs35321365	No	CTAGE1
192	18:21115060:A:G	rs6507716	18	21115060	6.1609e-11	21075441	21165409	77	3	1	1	rs6507716	Yes	NPC1
193	18:47169989:C:T	rs1970696	18	47169989	3.90183e-24	47074869	47182664	62	23	5	2	rs2000813;rs1970696	No	LIPG
194	18:56118358:C:T	rs41292412	18	56118358	1.85305e-14	56089858	56118358	2	1	1	1	rs41292412	No	MIR122,MIR3591
195	18:60845884:C:T	rs12454712	18	60845884	2.42299e-19	60845884	60878883	34	2	2	1	rs12454712	No	BCL2
196	19:7220596:G:T	rs3890483	19	7220596	6.41387e-24	7185576	7298592	99	40	7	3	rs2396187;rs3890483;rs8101064	No	INSR
197	19:7970635:A:G	rs4804833	19	7970635	5.75099e-24	7880469	7978430	73	39	7	2	rs3745383;rs4804833	No	MAP2K7
198	19:8432737:C:T	rs117760119	19	8432737	9.50253e-45	8368142	8625196	257	125	18	5	rs117760119;rs62117489;rs10410840;rs1812467;rs73501545	No	ANGPTL4
199	19:18397788:A:G	rs12463315	19	18397788	2.24487e-12	18343185	18408519	113	12	3	1	rs12463315	No	MIR3188
200	19:19379549:C:T	rs58542926	19	19379549	4.52799e-67	19083483	19805771	408	234	14	2	rs58542926;rs187429064	No	TM6SF2
201	19:33889593:A:G	rs7256564	19	33889593	1.0024e-34	33784657	34025030	308	114	20	3	rs73024215;rs56361048;rs7256564	No	PEPD
202	19:35551428:A:C	rs58895965	19	35551428	9.32971e-16	35541248	35566151	45	18	2	2	rs58895965;rs1672991	No	HPN,HPN-AS1
203	19:40753001:C:T	rs117090198	19	40753001	2.74205e-11	40409722	40753001	3	2	1	1	rs117090198	Yes	AKT2
204	19:45416178:G:T	rs483082	19	45416178	8.53283e-196	45295886	45436657	143	86	33	12	rs112450640;rs28399635;rs41290120;rs11669338;rs79701229;rs117310449;rs1160984;rs405697;rs769446;rs483082;rs1064725;rs8106813	No	APOC1
205	19:46178661:C:T	rs2238689	19	46178661	5.35775e-15	46147527	46419447	75	4	4	3	rs4802269;rs2238689;rs11672020	No	GIPR
206	19:49259529:A:G	rs838133	19	49259529	2.75765e-21	49168942	49279227	134	52	6	2	rs838133;rs62132810	No	FGF21
207	19:54793280:C:T	rs56883673	19	54793280	2.60206e-18	54752217	54809343	50	20	3	2	rs12975366;rs56883673	No	LILRA3
208	19:56102362:A:G	rs12610709	19	56102362	2.10237e-15	56077305	56119837	23	13	2	1	rs12610709	No	FIZ1
209	20:571467:A:C	rs144033177	20	571467	5.79928e-15	569164	571467	2	2	1	1	rs144033177	No	TCF15
210	20:32905161:G:T	rs6088461	20	32905161	2.70017e-12	32514061	33449739	463	40	2	1	rs6088461	No	AHCY
211	20:39227946:C:T	rs6102057	20	39227946	1.41217e-11	39143298	39234223	84	18	1	1	rs6102057	No	MAFB
212	20:39924279:A:G	rs6102343	20	39924279	3.97564e-11	39660687	39971828	44	8	2	1	rs6102343	No	ZHX3
213	20:43042364:C:T	rs1800961	20	43042364	1.48442e-18	43042364	43042364	1	1	1	1	rs1800961	No	HNF4A
214	20:44551855:C:T	rs6073958	20	44551855	3.89562e-133	43733785	45606853	745	256	30	10	rs6032360;rs980984;rs148773337;rs6130969;rs6073958;rs3746503;rs12373874;rs56050009;rs4809604;rs6066141	No	PLTP
215	20:55836040:A:G	rs6123685	20	55836040	7.09208e-17	55836040	55836040	1	1	1	1	rs6123685	No	BMP7
216	20:56113783:A:G	rs7274718	20	56113783	6.55993e-13	56108386	56137834	45	14	2	1	rs7274718	No	CTCFL
217	22:38599978:A:G	rs4820325	22	38599978	6.33427e-37	38505347	39152412	595	389	12	3	rs4820325;rs75520567;rs138430	No	MAFF
Abbreviations: CPASSOC, cross-phenotype association analysis; Fins, fasting insulin; GWAS, genome-wide association study; HOMA-IR, homeostasis model assessment of insulin resistance; IR, insulin resistance; ISI, insulin resistance index; MTAG, multi-trait analysis of genome-wide association study; NGWAMA, N-weighted genome-wide association meta-analysis; SNP, single nucleotide polymorphism; TG:HD…

## Sheet: ST6
Supplementary Table 6. UVMR estimates for the causal associations of IR with cardiometabolic health and longevity outcomes
Exposure	Outcome	Method	No. of SNPs	β	SE	OR (95% CI)	P value	FDR-adjusted P value
HOMA-IR	Type 1 diabetes	MR Egger	13	-0.156813	1.28602	0.85 (0.07, 10.63)	0.905148	NA
HOMA-IR	Type 1 diabetes	Weighted median	13	0.849375	0.415328	2.34 (1.04, 5.28)	0.040848	NA
HOMA-IR	Type 1 diabetes	Simple mode	13	0.959441	0.627839	2.61 (0.76, 8.94)	0.152393	NA
HOMA-IR	Type 1 diabetes	Weighted mode	13	0.818043	0.546726	2.27 (0.78, 6.62)	0.160417	NA
HOMA-IR	Type 1 diabetes	Inverse variance weighted	13	0.803057	0.355901	2.23 (1.11, 4.48)	0.0240455	0.0491142
ISI*	Type 1 diabetes	MR Egger	8	1.42105	0.506287	4.14 (1.54, 11.17)	0.0308856	NA
ISI*	Type 1 diabetes	Weighted median	8	0.629769	0.219864	1.88 (1.22, 2.89)	0.00417857	NA
ISI*	Type 1 diabetes	Simple mode	8	0.651521	0.302764	1.92 (1.06, 3.47)	0.0684205	NA
ISI*	Type 1 diabetes	Weighted mode	8	0.647852	0.278056	1.91 (1.11, 3.30)	0.0526191	NA
ISI*	Type 1 diabetes	Inverse variance weighted	8	0.634017	0.169117	1.89 (1.35, 2.63)	0.000177557	0.000619834
Fins	Type 1 diabetes	MR Egger	38	1.67337	1.06395	5.33 (0.66, 42.89)	0.124514	NA
Fins	Type 1 diabetes	Weighted median	38	0.858102	0.370635	2.36 (1.14, 4.88)	0.020601	NA
Fins	Type 1 diabetes	Simple mode	38	0.829625	0.615113	2.29 (0.69, 7.65)	0.18562	NA
Fins	Type 1 diabetes	Weighted mode	38	1.12274	0.532657	3.07 (1.08, 8.73)	0.0418826	NA
Fins	Type 1 diabetes	Inverse variance weighted	38	0.75415	0.331653	2.13 (1.11, 4.07)	0.0229711	0.0483814
TG:HDL-C	Type 1 diabetes	MR Egger	205	-0.0531538	0.0718474	0.95 (0.82, 1.09)	0.460267	NA
TG:HDL-C	Type 1 diabetes	Weighted median	205	0.107493	0.0661484	1.11 (0.98, 1.27)	0.104155	NA
TG:HDL-C	Type 1 diabetes	Simple mode	205	0.323285	0.122675	1.38 (1.09, 1.76)	0.00905227	NA
TG:HDL-C	Type 1 diabetes	Weighted mode	205	0.0829495	0.0617573	1.09 (0.96, 1.23)	0.180715	NA
TG:HDL-C	Type 1 diabetes	Inverse variance weighted	205	0.117689	0.0463849	1.12 (1.03, 1.23)	0.0111737	0.0258476
mvIR_NGWAMA	Type 1 diabetes	MR Egger	323	0.0391114	0.111562	1.04 (0.84, 1.29)	0.726135	NA
mvIR_NGWAMA	Type 1 diabetes	Weighted median	323	0.207784	0.102931	1.23 (1.01, 1.51)	0.0435204	NA
mvIR_NGWAMA	Type 1 diabetes	Simple mode	323	0.708284	0.248171	2.03 (1.25, 3.30)	0.00459676	NA
mvIR_NGWAMA	Type 1 diabetes	Weighted mode	323	0.195065	0.109361	1.22 (0.98, 1.51)	0.0754175	NA
mvIR_NGWAMA	Type 1 diabetes	Inverse variance weighted	323	0.304132	0.0677986	1.36 (1.19, 1.55)	7.26341e-06	3.4014e-05
mvIR_MTAG	Type 1 diabetes	MR Egger	191	0.136667	0.224787	1.15 (0.74, 1.78)	0.543927	NA
mvIR_MTAG	Type 1 diabetes	Weighted median	191	0.298129	0.123873	1.35 (1.06, 1.72)	0.0160958	NA
mvIR_MTAG	Type 1 diabetes	Simple mode	191	0.5302	0.254672	1.70 (1.03, 2.80)	0.0386921	NA
mvIR_MTAG	Type 1 diabetes	Weighted mode	191	0.347111	0.159281	1.41 (1.04, 1.93)	0.0305439	NA
mvIR_MTAG	Type 1 diabetes	Inverse variance weighted	191	0.413833	0.114206	1.51 (1.21, 1.89)	0.000290556	0.000929779
HOMA-IR	Type 2 diabetes	MR Egger	12	-1.31239	1.2359	0.27 (0.02, 3.03)	0.313258	NA
HOMA-IR	Type 2 diabetes	Weighted median	12	-0.0989157	0.366342	0.91 (0.44, 1.86)	0.787153	NA
HOMA-IR	Type 2 diabetes	Simple mode	12	0.0402333	0.528161	1.04 (0.37, 2.93)	0.940647	NA
HOMA-IR	Type 2 diabetes	Weighted mode	12	-0.00534884	0.498693	0.99 (0.37, 2.64)	0.991634	NA
HOMA-IR	Type 2 diabetes	Inverse variance weighted	12	0.209207	0.384702	1.23 (0.58, 2.62)	0.586569	0.691363
ISI*	Type 2 diabetes	MR Egger	8	1.70847	1.11879	5.52 (0.62, 49.47)	0.177598	NA
ISI*	Type 2 diabetes	Weighted median	8	1.45471	0.223664	4.28 (2.76, 6.64)	7.8214e-11	NA
ISI*	Type 2 diabetes	Simple mode	8	1.43268	0.319563	4.19 (2.24, 7.84)	0.00285508	NA
ISI*	Type 2 diabetes	Weighted mode	8	1.42198	0.249813	4.15 (2.54, 6.76)	0.000741328	NA
ISI*	Type 2 diabetes	Inverse variance weighted	8	1.47883	0.292021	4.39 (2.48, 7.78)	4.10305e-07	2.18829e-06
Fins	Type 2 diabetes	MR Egger	38	5.99618	2.43257	401.89 (3.42, 47288.33)	0.0186066	NA
Fins	Type 2 diabetes	Weighted median	38	2.76197	0.365585	15.83 (7.73, 32.41)	4.19093e-14	NA
Fins	Type 2 diabetes	Simple mode	38	3.50412	0.600263	33.25 (10.25, 107.84)	1.04179e-06	NA
Fins	Type 2 diabetes	Weighted mode	38	3.41783	0.53152	30.50 (10.76, 86.45)	1.64569e-07	NA
Fins	Type 2 diabetes	Inverse variance weighted	38	1.82095	0.802034	6.18 (1.28, 29.75)	0.0231827	0.0483814
TG:HDL-C	Type 2 diabetes	MR Egger	213	-0.0310362	0.0881194	0.97 (0.82, 1.15)	0.725035	NA
TG:HDL-C	Type 2 diabetes	Weighted median	213	0.127379	0.0597556	1.14 (1.01, 1.28)	0.0330349	NA
TG:HDL-C	Type 2 diabetes	Simple mode	213	0.231109	0.144432	1.26 (0.95, 1.67)	0.11106	NA
TG:HDL-C	Type 2 diabetes	Weighted mode	213	0.15414	0.0591368	1.17 (1.04, 1.31)	0.00979638	NA
TG:HDL-C	Type 2 diabetes	Inverse variance weighted	213	0.296661	0.0563891	1.35 (1.20, 1.50)	1.43298e-07	8.59786e-07
mvIR_NGWAMA	Type 2 diabetes	MR Egger	341	0.182267	0.127368	1.20 (0.93, 1.54)	0.153344	NA
mvIR_NGWAMA	Type 2 diabetes	Weighted median	341	0.534816	0.0926096	1.71 (1.42, 2.05)	7.69767e-09	NA
mvIR_NGWAMA	Type 2 diabetes	Simple mode	341	0.345242	0.277401	1.41 (0.82, 2.43)	0.214151	NA
mvIR_NGWAMA	Type 2 diabetes	Weighted mode	341	0.345242	0.100095	1.41 (1.16, 1.72)	0.000633104	NA
mvIR_NGWAMA	Type 2 diabetes	Inverse variance weighted	341	0.704548	0.0773185	2.02 (1.74, 2.35)	8.06615e-20	3.0974e-18
mvIR_MTAG	Type 2 diabetes	MR Egger	196	0.10941	0.183965	1.12 (0.78, 1.60)	0.552715	NA
mvIR_MTAG	Type 2 diabetes	Weighted median	196	0.534634	0.111531	1.71 (1.37, 2.12)	1.63824e-06	NA
mvIR_MTAG	Type 2 diabetes	Simple mode	196	0.526908	0.292794	1.69 (0.95, 3.01)	0.073472	NA
mvIR_MTAG	Type 2 diabetes	Weighted mode	196	0.417067	0.125735	1.52 (1.19, 1.94)	0.00108525	NA
mvIR_MTAG	Type 2 diabetes	Inverse variance weighted	196	0.865538	0.0982749	2.38 (1.96, 2.88)	1.28172e-18	3.51557e-17
HOMA-IR	SAID	MR Egger	11	1.08196	5.1596	2.95 (0.00, 72749.68)	0.838573	NA
HOMA-IR	SAID	Weighted median	11	0.0443305	1.5372	1.05 (0.05, 21.27)	0.976993	NA
HOMA-IR	SAID	Simple mode	11	-0.859728	2.31641	0.42 (0.00, 39.66)	0.71827	NA
HOMA-IR	SAID	Weighted mode	11	-0.859728	2.14463	0.42 (0.01, 28.32)	0.696943	NA
HOMA-IR	SAID	Inverse variance weighted	11	0.683365	1.1256	1.98 (0.22, 17.99)	0.543777	0.66538
ISI*	SAID	MR Egger	7	3.46886	2.44373	32.10 (0.27, 3860.62)	0.214981	NA
ISI*	SAID	Weighted median	7	1.05435	0.791408	2.87 (0.61, 13.54)	0.182778	NA
ISI*	SAID	Simple mode	7	1.00954	1.07535	2.74 (0.33, 22.58)	0.38407	NA
ISI*	SAID	Weighted mode	7	1.21373	0.995839	3.37 (0.48, 23.70)	0.268661	NA
ISI*	SAID	Inverse variance weighted	7	0.795245	0.642733	2.21 (0.63, 7.81)	0.215981	0.342713
Fins	SAID	MR Egger	32	4.40101	3.25314	81.53 (0.14, 47914.15)	0.186212	NA
Fins	SAID	Weighted median	32	0.159674	1.33676	1.17 (0.09, 16.11)	0.90492	NA
Fins	SAID	Simple mode	32	-2.25693	2.53291	0.10 (0.00, 14.99)	0.37977	NA
Fins	SAID	Weighted mode	32	-0.000813965	2.04448	1.00 (0.02, 54.95)	0.999685	NA
Fins	SAID	Inverse variance weighted	32	0.316359	0.933097	1.37 (0.22, 8.54)	0.734578	0.81127
TG:HDL-C	SAID	MR Egger	183	0.303393	0.249377	1.35 (0.83, 2.21)	0.225339	NA
TG:HDL-C	SAID	Weighted median	183	0.0882343	0.237268	1.09 (0.69, 1.74)	0.709985	NA
TG:HDL-C	SAID	Simple mode	183	0.472565	0.539687	1.60 (0.56, 4.62)	0.382387	NA
TG:HDL-C	SAID	Weighted mode	183	0.114809	0.267867	1.12 (0.66, 1.90)	0.668717	NA
TG:HDL-C	SAID	Inverse variance weighted	183	0.315973	0.14729	1.37 (1.03, 1.83)	0.0319337	0.0645397
mvIR_NGWAMA	SAID	MR Egger	311	0.119833	0.411657	1.13 (0.50, 2.53)	0.771171	NA
mvIR_NGWAMA	SAID	Weighted median	311	0.125402	0.372877	1.13 (0.55, 2.35)	0.736638	NA
mvIR_NGWAMA	SAID	Simple mode	311	-0.402423	0.819714	0.67 (0.13, 3.33)	0.623822	NA
mvIR_NGWAMA	SAID	Weighted mode	311	0.183013	0.425543	1.20 (0.52, 2.77)	0.667444	NA
mvIR_NGWAMA	SAID	Inverse variance weighted	311	0.611595	0.2309	1.84 (1.17, 2.90)	0.0080793	0.0193903
mvIR_MTAG	SAID	MR Egger	179	0.466901	0.54377	1.60 (0.55, 4.63)	0.391702	NA
mvIR_MTAG	SAID	Weighted median	179	0.0808434	0.406546	1.08 (0.49, 2.41)	0.842377	NA
mvIR_MTAG	SAID	Simple mode	179	-0.384947	0.866003	0.68 (0.12, 3.72)	0.657214	NA
mvIR_MTAG	SAID	Weighted mode	179	-0.0105935	0.498872	0.99 (0.37, 2.63)	0.983082	NA
mvIR_MTAG	SAID	Inverse variance weighted	179	0.534529	0.265502	1.71 (1.01, 2.87)	0.0440855	0.0846442
HOMA-IR	SIDD	MR Egger	11	5.54177	4.91544	255.13 (0.02, 3898208.65)	0.288723	NA
HOMA-IR	SIDD	Weighted median	11	0.216342	1.21509	1.24 (0.11, 13.44)	0.858687	NA
HOMA-IR	SIDD	Simple mode	11	-1.66758	2.36603	0.19 (0.00, 19.49)	0.497022	NA
HOMA-IR	SIDD	Weighted mode	11	-1.49574	2.63205	0.22 (0.00, 38.98)	0.582379	NA
HOMA-IR	SIDD	Inverse variance weighted	11	0.788824	1.06702	2.20 (0.27, 17.82)	0.459739	0.600476
ISI*	SIDD	MR Egger	7	-0.195502	1.85208	0.82 (0.02, 31.02)	0.920037	NA
ISI*	SIDD	Weighted median	7	1.42719	0.602146	4.17 (1.28, 13.56)	0.0177795	NA
ISI*	SIDD	Simple mode	7	1.41997	0.874349	4.14 (0.75, 22.96)	0.155495	NA
ISI*	SIDD	Weighted mode	7	1.37475	0.712265	3.95 (0.98, 15.97)	0.101828	NA
ISI*	SIDD	Inverse variance weighted	7	1.84827	0.499354	6.35 (2.39, 16.89)	0.000214477	0.000709994
Fins	SIDD	MR Egger	32	4.56425	4.20717	95.99 (0.03, 365969.16)	0.286619	NA
Fins	SIDD	Weighted median	32	3.25776	0.974396	25.99 (3.85, 175.49)	0.000827679	NA
Fins	SIDD	Simple mode	32	3.33446	1.76118	28.06 (0.89, 885.70)	0.0676845	NA
Fins	SIDD	Weighted mode	32	3.44845	1.47251	31.45 (1.75, 563.73)	0.0257878	NA
Fins	SIDD	Inverse variance weighted	32	1.39359	1.19935	4.03 (0.38, 42.28)	0.245255	0.370779
TG:HDL-C	SIDD	MR Egger	184	-0.217296	0.173886	0.80 (0.57, 1.13)	0.213033	NA
TG:HDL-C	SIDD	Weighted median	184	0.156268	0.176403	1.17 (0.83, 1.65)	0.375693	NA
TG:HDL-C	SIDD	Simple mode	184	0.128838	0.41659	1.14 (0.50, 2.57)	0.757469	NA
TG:HDL-C	SIDD	Weighted mode	184	-0.0237584	0.185353	0.98 (0.68, 1.40)	0.898148	NA
TG:HDL-C	SIDD	Inverse variance weighted	184	0.32869	0.102934	1.39 (1.14, 1.70)	0.00140708	0.00380506
mvIR_NGWAMA	SIDD	MR Egger	311	-0.169159	0.277722	0.84 (0.49, 1.46)	0.542909	NA
mvIR_NGWAMA	SIDD	Weighted median	311	0.609267	0.276316	1.84 (1.07, 3.16)	0.0274564	NA
mvIR_NGWAMA	SIDD	Simple mode	311	1.31768	0.601015	3.73 (1.15, 12.13)	0.029092	NA
mvIR_NGWAMA	SIDD	Weighted mode	311	0.408478	0.298081	1.50 (0.84, 2.70)	0.171566	NA
mvIR_NGWAMA	SIDD	Inverse variance weighted	311	0.831999	0.159991	2.30 (1.68, 3.14)	1.98986e-07	1.15773e-06
mvIR_MTAG	SIDD	MR Egger	180	-0.233626	0.361968	0.79 (0.39, 1.61)	0.519477	NA
mvIR_MTAG	SIDD	Weighted median	180	0.775537	0.269602	2.17 (1.28, 3.68)	0.00401992	NA
mvIR_MTAG	SIDD	Simple mode	180	1.59373	0.630031	4.92 (1.43, 16.92)	0.0122823	NA
mvIR_MTAG	SIDD	Weighted mode	180	0.597385	0.357628	1.82 (0.90, 3.66)	0.0965863	NA
mvIR_MTAG	SIDD	Inverse variance weighted	180	1.05469	0.17743	2.87 (2.03, 4.07)	2.77691e-09	2.05064e-08
HOMA-IR	SIRD	MR Egger	11	7.10765	5.18708	1221.28 (0.05, 31779718.24)	0.203811	NA
HOMA-IR	SIRD	Weighted median	11	1.7922	1.16574	6.00 (0.61, 58.97)	0.1242	NA
HOMA-IR	SIRD	Simple mode	11	2.0049	2.03203	7.43 (0.14, 398.49)	0.347086	NA
HOMA-IR	SIRD	Weighted mode	11	1.80478	1.99172	6.08 (0.12, 301.43)	0.386173	NA
HOMA-IR	SIRD	Inverse variance weighted	11	1.53208	1.13379	4.63 (0.50, 42.70)	0.176603	0.284939
ISI*	SIRD	MR Egger	7	2.24774	2.43094	9.47 (0.08, 1110.30)	0.397584	NA
ISI*	SIRD	Weighted median	7	0.213455	0.653518	1.24 (0.34, 4.46)	0.743952	NA
ISI*	SIRD	Simple mode	7	0.24557	1.14475	1.28 (0.14, 12.05)	0.837248	NA
ISI*	SIRD	Weighted mode	7	-0.0296788	0.809961	0.97 (0.20, 4.75)	0.971959	NA
ISI*	SIRD	Inverse variance weighted	7	0.88977	0.60139	2.43 (0.75, 7.91)	0.139001	0.232072
Fins	SIRD	MR Egger	32	2.78386	2.52589	16.18 (0.11, 2286.10)	0.279169	NA
Fins	SIRD	Weighted median	32	1.90456	0.961558	6.72 (1.02, 44.22)	0.0476249	NA
Fins	SIRD	Simple mode	32	3.54136	1.95263	34.51 (0.75, 1585.28)	0.0794263	NA
Fins	SIRD	Weighted mode	32	2.16294	1.55727	8.70 (0.41, 184.05)	0.174752	NA
Fins	SIRD	Inverse variance weighted	32	1.78197	0.715147	5.94 (1.46, 24.14)	0.0127112	0.0287124
TG:HDL-C	SIRD	MR Egger	183	-0.0435979	0.174804	0.96 (0.68, 1.35)	0.803326	NA
TG:HDL-C	SIRD	Weighted median	183	0.193753	0.160872	1.21 (0.89, 1.66)	0.228438	NA
TG:HDL-C	SIRD	Simple mode	183	0.249418	0.329572	1.28 (0.67, 2.45)	0.450152	NA
TG:HDL-C	SIRD	Weighted mode	183	0.109013	0.172541	1.12 (0.80, 1.56)	0.528304	NA
TG:HDL-C	SIRD	Inverse variance weighted	183	0.321954	0.103394	1.38 (1.13, 1.69)	0.00184667	0.00479136
mvIR_NGWAMA	SIRD	MR Egger	310	-0.013857	0.273628	0.99 (0.58, 1.69)	0.959644	NA
mvIR_NGWAMA	SIRD	Weighted median	310	0.45782	0.261527	1.58 (0.95, 2.64)	0.0800204	NA
mvIR_NGWAMA	SIRD	Simple mode	310	0.689713	0.566812	1.99 (0.66, 6.05)	0.224598	NA
mvIR_NGWAMA	SIRD	Weighted mode	310	0.301496	0.304451	1.35 (0.74, 2.46)	0.322805	NA
mvIR_NGWAMA	SIRD	Inverse variance weighted	310	0.802648	0.156128	2.23 (1.64, 3.03)	2.73327e-07	1.54349e-06
mvIR_MTAG	SIRD	MR Egger	179	-0.0018664	0.36244	1.00 (0.49, 2.03)	0.995897	NA
mvIR_MTAG	SIRD	Weighted median	179	0.679001	0.285115	1.97 (1.13, 3.45)	0.0172422	NA
mvIR_MTAG	SIRD	Simple mode	179	0.866773	0.648567	2.38 (0.67, 8.48)	0.18311	NA
mvIR_MTAG	SIRD	Weighted mode	179	0.623128	0.351454	1.86 (0.94, 3.71)	0.0779386	NA
mvIR_MTAG	SIRD	Inverse variance weighted	179	0.912144	0.177857	2.49 (1.76, 3.53)	2.92023e-07	1.60195e-06
HOMA-IR	MOD	MR Egger	11	1.60796	3.46187	4.99 (0.01, 4417.02)	0.653336	NA
HOMA-IR	MOD	Weighted median	11	-0.198004	0.954404	0.82 (0.13, 5.33)	0.835648	NA
HOMA-IR	MOD	Simple mode	11	0.348362	1.66511	1.42 (0.05, 37.04)	0.838482	NA
HOMA-IR	MOD	Weighted mode	11	0.183355	1.54894	1.20 (0.06, 25.01)	0.908115	NA
HOMA-IR	MOD	Inverse variance weighted	11	-0.0495888	0.75282	0.95 (0.22, 4.16)	0.947481	0.973981
ISI*	MOD	MR Egger	7	1.83053	1.90714	6.24 (0.15, 262.05)	0.381223	NA
ISI*	MOD	Weighted median	7	-0.0187103	0.577762	0.98 (0.32, 3.05)	0.974166	NA
ISI*	MOD	Simple mode	7	-0.132903	0.920064	0.88 (0.14, 5.31)	0.889876	NA
ISI*	MOD	Weighted mode	7	-0.0017776	0.771784	1.00 (0.22, 4.53)	0.998237	NA
ISI*	MOD	Inverse variance weighted	7	0.657776	0.475988	1.93 (0.76, 4.91)	0.166997	0.271724
Fins	MOD	MR Egger	32	2.06824	3.8021	7.91 (0.00, 13634.61)	0.59048	NA
Fins	MOD	Weighted median	32	0.173565	1.01335	1.19 (0.16, 8.67)	0.864005	NA
Fins	MOD	Simple mode	32	2.4363	2.07767	11.43 (0.19, 670.84)	0.249885	NA
Fins	MOD	Weighted mode	32	0.591459	1.44682	1.81 (0.11, 30.79)	0.685498	NA
Fins	MOD	Inverse variance weighted	32	0.408108	1.07636	1.50 (0.18, 12.40)	0.704573	0.7973
TG:HDL-C	MOD	MR Egger	184	0.213553	0.171503	1.24 (0.88, 1.73)	0.214663	NA
TG:HDL-C	MOD	Weighted median	184	0.346047	0.16082	1.41 (1.03, 1.94)	0.0314156	NA
TG:HDL-C	MOD	Simple mode	184	0.293164	0.318419	1.34 (0.72, 2.50)	0.358425	NA
TG:HDL-C	MOD	Weighted mode	184	0.261971	0.172067	1.30 (0.93, 1.82)	0.129611	NA
TG:HDL-C	MOD	Inverse variance weighted	184	0.390241	0.101571	1.48 (1.21, 1.80)	0.000122021	0.000450538
mvIR_NGWAMA	MOD	MR Egger	311	0.295165	0.259893	1.34 (0.81, 2.24)	0.256954	NA
mvIR_NGWAMA	MOD	Weighted median	311	0.510089	0.244918	1.67 (1.03, 2.69)	0.0372794	NA
mvIR_NGWAMA	MOD	Simple mode	311	-0.0090273	0.552365	0.99 (0.34, 2.93)	0.986971	NA
mvIR_NGWAMA	MOD	Weighted mode	311	0.355951	0.272697	1.43 (0.84, 2.44)	0.192758	NA
mvIR_NGWAMA	MOD	Inverse variance weighted	311	0.778507	0.146345	2.18 (1.64, 2.90)	1.03959e-07	6.43873e-07
mvIR_MTAG	MOD	MR Egger	180	0.0547786	0.341671	1.06 (0.54, 2.06)	0.872806	NA
mvIR_MTAG	MOD	Weighted median	180	0.583324	0.264167	1.79 (1.07, 3.01)	0.0272329	NA
mvIR_MTAG	MOD	Simple mode	180	0.100107	0.635327	1.11 (0.32, 3.84)	0.874975	NA
mvIR_MTAG	MOD	Weighted mode	180	0.211502	0.353214	1.24 (0.62, 2.47)	0.550068	NA
mvIR_MTAG	MOD	Inverse variance weighted	180	0.907012	0.168023	2.48 (1.78, 3.44)	6.73321e-08	4.30926e-07
HOMA-IR	MARD	MR Egger	11	4.16161	3.14831	64.17 (0.13, 30708.48)	0.218827	NA
HOMA-IR	MARD	Weighted median	11	0.807492	0.867208	2.24 (0.41, 12.27)	0.351781	NA
HOMA-IR	MARD	Simple mode	11	-0.0872882	1.67133	0.92 (0.03, 24.25)	0.959377	NA
HOMA-IR	MARD	Weighted mode	11	3.07197	1.82362	21.58 (0.61, 769.91)	0.12298	NA
HOMA-IR	MARD	Inverse variance weighted	11	1.18828	0.680196	3.28 (0.87, 12.45)	0.0806421	0.144704
ISI*	MARD	MR Egger	7	2.84841	1.33179	17.26 (1.27, 234.80)	0.085449	NA
ISI*	MARD	Weighted median	7	0.985168	0.460149	2.68 (1.09, 6.60)	0.0322762	NA
ISI*	MARD	Simple mode	7	1.71955	0.801527	5.58 (1.16, 26.86)	0.0755903	NA
ISI*	MARD	Weighted mode	7	0.903192	0.665469	2.47 (0.67, 9.09)	0.22354	NA
ISI*	MARD	Inverse variance weighted	7	1.23729	0.349687	3.45 (1.74, 6.84)	0.000402764	0.00124727
Fins	MARD	MR Egger	32	3.22537	3.72315	25.16 (0.02, 37150.77)	0.393201	NA
Fins	MARD	Weighted median	32	1.91057	0.773904	6.76 (1.48, 30.80)	0.0135587	NA
Fins	MARD	Simple mode	32	0.336337	1.49601	1.40 (0.07, 26.27)	0.823592	NA
Fins	MARD	Weighted mode	32	1.12368	1.22071	3.08 (0.28, 33.66)	0.36441	NA
Fins	MARD	Inverse variance weighted	32	1.13183	1.05674	3.10 (0.39, 24.61)	0.284143	0.422911
TG:HDL-C	MARD	MR Egger	184	-0.16087	0.149131	0.85 (0.64, 1.14)	0.282143	NA
TG:HDL-C	MARD	Weighted median	184	0.0464334	0.136965	1.05 (0.80, 1.37)	0.734598	NA
TG:HDL-C	MARD	Simple mode	184	-0.0560638	0.306236	0.95 (0.52, 1.72)	0.854943	NA
TG:HDL-C	MARD	Weighted mode	184	-0.0815734	0.151601	0.92 (0.68, 1.24)	0.591176	NA
TG:HDL-C	MARD	Inverse variance weighted	184	0.182945	0.0896904	1.20 (1.01, 1.43)	0.0413759	0.0810631
mvIR_NGWAMA	MARD	MR Egger	311	-0.100903	0.230543	0.90 (0.58, 1.42)	0.661928	NA
mvIR_NGWAMA	MARD	Weighted median	311	0.213682	0.208589	1.24 (0.82, 1.86)	0.305639	NA
mvIR_NGWAMA	MARD	Simple mode	311	0.254191	0.52544	1.29 (0.46, 3.61)	0.628892	NA
mvIR_NGWAMA	MARD	Weighted mode	311	0.0575644	0.261608	1.06 (0.63, 1.77)	0.825984	NA
mvIR_NGWAMA	MARD	Inverse variance weighted	311	0.563318	0.130893	1.76 (1.36, 2.27)	1.67995e-05	7.50117e-05
mvIR_MTAG	MARD	MR Egger	180	-0.19659	0.275388	0.82 (0.48, 1.41)	0.476246	NA
mvIR_MTAG	MARD	Weighted median	180	0.444933	0.228316	1.56 (1.00, 2.44)	0.0513246	NA
mvIR_MTAG	MARD	Simple mode	180	0.638943	0.485876	1.89 (0.73, 4.91)	0.190181	NA
mvIR_MTAG	MARD	Weighted mode	180	0.326361	0.303263	1.39 (0.76, 2.51)	0.283302	NA
mvIR_MTAG	MARD	Inverse variance weighted	180	0.612187	0.139097	1.84 (1.40, 2.42)	1.07683e-05	4.92265e-05
HOMA-IR	GDM	MR Egger	13	-0.931888	1.49657	0.39 (0.02, 7.40)	0.546184	NA
HOMA-IR	GDM	Weighted median	13	0.0481033	0.240047	1.05 (0.66, 1.68)	0.841175	NA
HOMA-IR	GDM	Simple mode	13	0.166536	0.33511	1.18 (0.61, 2.28)	0.628198	NA
HOMA-IR	GDM	Weighted mode	13	0.166536	0.306409	1.18 (0.65, 2.15)	0.596733	NA
HOMA-IR	GDM	Inverse variance weighted	13	0.267922	0.417585	1.31 (0.58, 2.96)	0.521134	0.658906
ISI*	GDM	MR Egger	8	0.812845	0.419453	2.25 (0.99, 5.13)	0.100739	NA
ISI*	GDM	Weighted median	8	0.554355	0.145855	1.74 (1.31, 2.32)	0.000144271	NA
ISI*	GDM	Simple mode	8	0.641932	0.247785	1.90 (1.17, 3.09)	0.0359089	NA
ISI*	GDM	Weighted mode	8	0.543366	0.201764	1.72 (1.16, 2.56)	0.0309477	NA
ISI*	GDM	Inverse variance weighted	8	0.600233	0.132387	1.82 (1.41, 2.36)	5.79004e-06	2.77922e-05
Fins	GDM	MR Egger	37	2.6739	1.26905	14.50 (1.21, 174.38)	0.0423549	NA
Fins	GDM	Weighted median	37	1.20081	0.253832	3.32 (2.02, 5.46)	2.23701e-06	NA
Fins	GDM	Simple mode	37	0.907814	0.469277	2.48 (0.99, 6.22)	0.0609414	NA
Fins	GDM	Weighted mode	37	0.782314	0.369926	2.19 (1.06, 4.51)	0.0414384	NA
Fins	GDM	Inverse variance weighted	37	1.02466	0.409477	2.79 (1.25, 6.22)	0.0123363	0.0281973
TG:HDL-C	GDM	MR Egger	209	-0.0364305	0.0497972	0.96 (0.87, 1.06)	0.465254	NA
TG:HDL-C	GDM	Weighted median	209	0.0678692	0.0389028	1.07 (0.99, 1.16)	0.0810575	NA
TG:HDL-C	GDM	Simple mode	209	0.11239	0.0828606	1.12 (0.95, 1.32)	0.176452	NA
TG:HDL-C	GDM	Weighted mode	209	0.0641433	0.0351653	1.07 (1.00, 1.14)	0.0695794	NA
TG:HDL-C	GDM	Inverse variance weighted	209	0.126888	0.0326658	1.14 (1.06, 1.21)	0.000102572	0.000386152
mvIR_NGWAMA	GDM	MR Egger	333	0.0199314	0.0778496	1.02 (0.88, 1.19)	0.798091	NA
mvIR_NGWAMA	GDM	Weighted median	333	0.156519	0.0614568	1.17 (1.04, 1.32)	0.0108711	NA
mvIR_NGWAMA	GDM	Simple mode	333	0.457777	0.150127	1.58 (1.18, 2.12)	0.00247846	NA
mvIR_NGWAMA	GDM	Weighted mode	333	0.158859	0.0593099	1.17 (1.04, 1.32)	0.00776406	NA
mvIR_NGWAMA	GDM	Inverse variance weighted	333	0.355651	0.0485987	1.43 (1.30, 1.57)	2.5148e-13	3.21895e-12
mvIR_MTAG	GDM	MR Egger	194	-0.0177448	0.118122	0.98 (0.78, 1.24)	0.880745	NA
mvIR_MTAG	GDM	Weighted median	194	0.247547	0.0736569	1.28 (1.11, 1.48)	0.000777148	NA
mvIR_MTAG	GDM	Simple mode	194	0.378378	0.17996	1.46 (1.03, 2.08)	0.0368005	NA
mvIR_MTAG	GDM	Weighted mode	194	0.198567	0.104501	1.22 (0.99, 1.50)	0.0589041	NA
mvIR_MTAG	GDM	Inverse variance weighted	194	0.378963	0.0617075	1.46 (1.29, 1.65)	8.1859e-10	6.83344e-09
HOMA-IR	Metabolic syndrome	MR Egger	12	-0.0229872	0.092363	0.98 (0.82, 1.17)	0.808491	NA
HOMA-IR	Metabolic syndrome	Weighted median	12	0.0371406	0.0261582	1.04 (0.99, 1.09)	0.155654	NA
HOMA-IR	Metabolic syndrome	Simple mode	12	0.0335324	0.0442699	1.03 (0.95, 1.13)	0.464695	NA
HOMA-IR	Metabolic syndrome	Weighted mode	12	0.0400975	0.036354	1.04 (0.97, 1.12)	0.293584	NA
HOMA-IR	Metabolic syndrome	Inverse variance weighted	12	0.0326535	0.028074	1.03 (0.98, 1.09)	0.244781	0.370779
ISI*	Metabolic syndrome	MR Egger	5	0.465284	0.247587	1.59 (0.98, 2.59)	0.156807	NA
ISI*	Metabolic syndrome	Weighted median	5	0.172426	0.0328266	1.19 (1.11, 1.27)	1.49949e-07	NA
ISI*	Metabolic syndrome	Simple mode	5	0.224985	0.0724717	1.25 (1.09, 1.44)	0.036065	NA
ISI*	Metabolic syndrome	Weighted mode	5	0.171246	0.080089	1.19 (1.01, 1.39)	0.0992886	NA
ISI*	Metabolic syndrome	Inverse variance weighted	5	0.241609	0.0590933	1.27 (1.13, 1.43)	4.33984e-05	0.000181141
Fins	Metabolic syndrome	MR Egger	24	0.743612	0.273484	2.10 (1.23, 3.60)	0.0125312	NA
Fins	Metabolic syndrome	Weighted median	24	0.466828	0.0545232	1.59 (1.43, 1.77)	1.10927e-17	NA
Fins	Metabolic syndrome	Simple mode	24	0.456589	0.162052	1.58 (1.15, 2.17)	0.0097679	NA
Fins	Metabolic syndrome	Weighted mode	24	0.392761	0.151192	1.48 (1.10, 1.99)	0.0160902	NA
Fins	Metabolic syndrome	Inverse variance weighted	24	0.638993	0.0685022	1.89 (1.66, 2.17)	1.07812e-20	5.17496e-19
TG:HDL-C	Metabolic syndrome	MR Egger	72	0.260635	0.03384	1.30 (1.21, 1.39)	6.46046e-11	NA
TG:HDL-C	Metabolic syndrome	Weighted median	72	0.284792	0.0104132	1.33 (1.30, 1.36)	1.10458e-164	NA
TG:HDL-C	Metabolic syndrome	Simple mode	72	0.303497	0.0222411	1.35 (1.30, 1.41)	1.57508e-21	NA
TG:HDL-C	Metabolic syndrome	Weighted mode	72	0.276005	0.010926	1.32 (1.29, 1.35)	3.2792e-37	NA
TG:HDL-C	Metabolic syndrome	Inverse variance weighted	72	0.325306	0.0143299	1.38 (1.35, 1.42)	4.35151e-114	4.17745e-112
mvIR_NGWAMA	Metabolic syndrome	MR Egger	109	0.421595	0.0652758	1.52 (1.34, 1.73)	3.18935e-09	NA
mvIR_NGWAMA	Metabolic syndrome	Weighted median	109	0.446339	0.0177127	1.56 (1.51, 1.62)	4.13178e-140	NA
mvIR_NGWAMA	Metabolic syndrome	Simple mode	109	0.466944	0.0396365	1.60 (1.48, 1.72)	4.22618e-21	NA
mvIR_NGWAMA	Metabolic syndrome	Weighted mode	109	0.423563	0.0191862	1.53 (1.47, 1.59)	7.8206e-42	NA
mvIR_NGWAMA	Metabolic syndrome	Inverse variance weighted	109	0.539526	0.0252918	1.72 (1.63, 1.80)	5.72484e-101	3.6639e-99
mvIR_MTAG	Metabolic syndrome	MR Egger	97	0.427986	0.057033	1.53 (1.37, 1.72)	3.28924e-11	NA
mvIR_MTAG	Metabolic syndrome	Weighted median	97	0.422361	0.016343	1.53 (1.48, 1.58)	2.87981e-147	NA
mvIR_MTAG	Metabolic syndrome	Simple mode	97	0.434743	0.0329385	1.54 (1.45, 1.65)	2.69398e-23	NA
mvIR_MTAG	Metabolic syndrome	Weighted mode	97	0.405802	0.0182005	1.50 (1.45, 1.55)	9.6664e-40	NA
mvIR_MTAG	Metabolic syndrome	Inverse variance weighted	97	0.495722	0.0212582	1.64 (1.57, 1.71)	2.83837e-120	5.44968e-118
HOMA-IR	NAFLD	MR Egger	13	4.64334	2.38837	103.89 (0.96, 11209.73)	0.0778897	NA
HOMA-IR	NAFLD	Weighted median	13	0.596797	0.893596	1.82 (0.32, 10.47)	0.504223	NA
HOMA-IR	NAFLD	Simple mode	13	0.437203	1.49399	1.55 (0.08, 28.95)	0.774795	NA
HOMA-IR	NAFLD	Weighted mode	13	0.674815	1.32122	1.96 (0.15, 26.16)	0.61879	NA
HOMA-IR	NAFLD	Inverse variance weighted	13	0.406801	0.717823	1.50 (0.37, 6.13)	0.570908	0.689399
ISI*	NAFLD	MR Egger	8	-0.212199	1.16312	0.81 (0.08, 7.91)	0.861246	NA
ISI*	NAFLD	Weighted median	8	0.632235	0.538145	1.88 (0.66, 5.40)	0.240058	NA
ISI*	NAFLD	Simple mode	8	0.781976	0.748967	2.19 (0.50, 9.49)	0.331161	NA
ISI*	NAFLD	Weighted mode	8	0.713941	0.723955	2.04 (0.49, 8.44)	0.356903	NA
ISI*	NAFLD	Inverse variance weighted	8	0.600027	0.387671	1.82 (0.85, 3.90)	0.121677	0.204929
Fins	NAFLD	MR Egger	38	2.38912	2.10408	10.90 (0.18, 673.92)	0.263682	NA
Fins	NAFLD	Weighted median	38	1.99533	0.844468	7.35 (1.41, 38.49)	0.0181364	NA
Fins	NAFLD	Simple mode	38	2.46624	1.80364	11.78 (0.34, 403.99)	0.179761	NA
Fins	NAFLD	Weighted mode	38	2.46624	1.6283	11.78 (0.48, 286.49)	0.138369	NA
Fins	NAFLD	Inverse variance weighted	38	2.25508	0.651034	9.54 (2.66, 34.16)	0.000532535	0.00159761
TG:HDL-C	NAFLD	MR Egger	205	0.134719	0.179801	1.14 (0.80, 1.63)	0.454563	NA
TG:HDL-C	NAFLD	Weighted median	205	0.32689	0.152585	1.39 (1.03, 1.87)	0.0321661	NA
TG:HDL-C	NAFLD	Simple mode	205	0.591373	0.304656	1.81 (0.99, 3.28)	0.0536216	NA
TG:HDL-C	NAFLD	Weighted mode	205	0.283695	0.149372	1.33 (0.99, 1.78)	0.0589429	NA
TG:HDL-C	NAFLD	Inverse variance weighted	205	0.220315	0.113568	1.25 (1.00, 1.56)	0.0523876	0.098612
mvIR_NGWAMA	NAFLD	MR Egger	323	0.253795	0.27538	1.29 (0.75, 2.21)	0.357422	NA
mvIR_NGWAMA	NAFLD	Weighted median	323	0.431618	0.25553	1.54 (0.93, 2.54)	0.091199	NA
mvIR_NGWAMA	NAFLD	Simple mode	323	0.786715	0.528018	2.20 (0.78, 6.18)	0.137219	NA
mvIR_NGWAMA	NAFLD	Weighted mode	323	0.516646	0.27974	1.68 (0.97, 2.90)	0.0656826	NA
mvIR_NGWAMA	NAFLD	Inverse variance weighted	323	0.503209	0.165424	1.65 (1.20, 2.29)	0.00235069	0.00601778
mvIR_MTAG	NAFLD	MR Egger	191	0.138381	0.405565	1.15 (0.52, 2.54)	0.733327	NA
mvIR_MTAG	NAFLD	Weighted median	191	0.244771	0.27535	1.28 (0.74, 2.19)	0.374032	NA
mvIR_MTAG	NAFLD	Simple mode	191	0.39273	0.59497	1.48 (0.46, 4.75)	0.509999	NA
mvIR_MTAG	NAFLD	Weighted mode	191	0.262709	0.381891	1.30 (0.62, 2.75)	0.492344	NA
mvIR_MTAG	NAFLD	Inverse variance weighted	191	0.251362	0.205013	1.29 (0.86, 1.92)	0.22017	0.346497
HOMA-IR	CKD	MR Egger	13	0.75685	1.1778	2.13 (0.21, 21.44)	0.53365	NA
HOMA-IR	CKD	Weighted median	13	0.20543	0.447023	1.23 (0.51, 2.95)	0.645838	NA
HOMA-IR	CKD	Simple mode	13	0.305045	0.686494	1.36 (0.35, 5.21)	0.664695	NA
HOMA-IR	CKD	Weighted mode	13	0.170682	0.585763	1.19 (0.38, 3.74)	0.775733	NA
HOMA-IR	CKD	Inverse variance weighted	13	0.130322	0.332474	1.14 (0.59, 2.19)	0.695076	0.7973
ISI*	CKD	MR Egger	8	-0.299948	0.573292	0.74 (0.24, 2.28)	0.619585	NA
ISI*	CKD	Weighted median	8	0.117389	0.25427	1.12 (0.68, 1.85)	0.644316	NA
ISI*	CKD	Simple mode	8	0.00940469	0.354568	1.01 (0.50, 2.02)	0.979579	NA
ISI*	CKD	Weighted mode	8	0.0444871	0.31711	1.05 (0.56, 1.95)	0.892383	NA
ISI*	CKD	Inverse variance weighted	8	0.203428	0.191336	1.23 (0.84, 1.78)	0.287691	0.424898
Fins	CKD	MR Egger	38	0.413566	0.900523	1.51 (0.26, 8.83)	0.648815	NA
Fins	CKD	Weighted median	38	0.424259	0.411891	1.53 (0.68, 3.43)	0.302996	NA
Fins	CKD	Simple mode	38	0.434949	0.783116	1.54 (0.33, 7.17)	0.581958	NA
Fins	CKD	Weighted mode	38	0.251278	0.679163	1.29 (0.34, 4.87)	0.713506	NA
Fins	CKD	Inverse variance weighted	38	0.794967	0.282456	2.21 (1.27, 3.85)	0.00488555	0.012026
TG:HDL-C	CKD	MR Egger	205	0.0341456	0.075848	1.03 (0.89, 1.20)	0.653058	NA
TG:HDL-C	CKD	Weighted median	205	0.0429074	0.0730098	1.04 (0.90, 1.20)	0.556737	NA
TG:HDL-C	CKD	Simple mode	205	0.0489013	0.138045	1.05 (0.80, 1.38)	0.723525	NA
TG:HDL-C	CKD	Weighted mode	205	0.0668057	0.0656032	1.07 (0.94, 1.22)	0.309728	NA
TG:HDL-C	CKD	Inverse variance weighted	205	0.0988402	0.0480373	1.10 (1.00, 1.21)	0.0396312	0.0784452
mvIR_NGWAMA	CKD	MR Egger	323	0.00793311	0.11768	1.01 (0.80, 1.27)	0.946295	NA
mvIR_NGWAMA	CKD	Weighted median	323	0.0986125	0.109482	1.10 (0.89, 1.37)	0.367738	NA
mvIR_NGWAMA	CKD	Simple mode	323	0.0984242	0.24367	1.10 (0.68, 1.78)	0.686536	NA
mvIR_NGWAMA	CKD	Weighted mode	323	0.0984242	0.113863	1.10 (0.88, 1.38)	0.388006	NA
mvIR_NGWAMA	CKD	Inverse variance weighted	323	0.255009	0.071399	1.29 (1.12, 1.48)	0.000354797	0.00111674
mvIR_MTAG	CKD	MR Egger	191	-0.0904533	0.161373	0.91 (0.67, 1.25)	0.575788	NA
mvIR_MTAG	CKD	Weighted median	191	-0.0380935	0.127904	0.96 (0.75, 1.24)	0.765834	NA
mvIR_MTAG	CKD	Simple mode	191	-0.116581	0.286046	0.89 (0.51, 1.56)	0.684056	NA
mvIR_MTAG	CKD	Weighted mode	191	-0.0717032	0.179599	0.93 (0.65, 1.32)	0.690164	NA
mvIR_MTAG	CKD	Inverse variance weighted	191	0.134559	0.0821496	1.14 (0.97, 1.34)	0.101426	0.17544
HOMA-IR	PCOS	MR Egger	13	0.405066	0.376665	1.50 (0.72, 3.14)	0.305218	NA
HOMA-IR	PCOS	Weighted median	13	0.0176442	0.142679	1.02 (0.77, 1.35)	0.901582	NA
HOMA-IR	PCOS	Simple mode	13	0.0370831	0.237863	1.04 (0.65, 1.65)	0.878703	NA
HOMA-IR	PCOS	Weighted mode	13	0.0623724	0.22098	1.06 (0.69, 1.64)	0.782558	NA
HOMA-IR	PCOS	Inverse variance weighted	13	0.00511696	0.107369	1.01 (0.81, 1.24)	0.961989	0.982457
ISI*	PCOS	MR Egger	8	-0.0705483	0.182529	0.93 (0.65, 1.33)	0.712458	NA
ISI*	PCOS	Weighted median	8	0.164267	0.0749539	1.18 (1.02, 1.37)	0.0284106	NA
ISI*	PCOS	Simple mode	8	0.191719	0.114382	1.21 (0.97, 1.52)	0.137618	NA
ISI*	PCOS	Weighted mode	8	0.154255	0.097664	1.17 (0.96, 1.41)	0.158245	NA
ISI*	PCOS	Inverse variance weighted	8	0.190553	0.0608235	1.21 (1.07, 1.36)	0.00173102	0.00455281
Fins	PCOS	MR Egger	37	-0.0263685	0.415449	0.97 (0.43, 2.20)	0.949753	NA
Fins	PCOS	Weighted median	37	0.256524	0.143268	1.29 (0.98, 1.71)	0.0733708	NA
Fins	PCOS	Simple mode	37	0.498532	0.298395	1.65 (0.92, 2.95)	0.103452	NA
Fins	PCOS	Weighted mode	37	0.31817	0.225955	1.37 (0.88, 2.14)	0.167675	NA
Fins	PCOS	Inverse variance weighted	37	0.323761	0.132372	1.38 (1.07, 1.79)	0.0144513	0.0318924
TG:HDL-C	PCOS	MR Egger	209	-0.0357783	0.0272717	0.96 (0.91, 1.02)	0.191	NA
TG:HDL-C	PCOS	Weighted median	209	0.00205528	0.0246874	1.00 (0.95, 1.05)	0.933651	NA
TG:HDL-C	PCOS	Simple mode	209	0.0472769	0.054173	1.05 (0.94, 1.17)	0.383832	NA
TG:HDL-C	PCOS	Weighted mode	209	-0.0288436	0.0225585	0.97 (0.93, 1.02)	0.202457	NA
TG:HDL-C	PCOS	Inverse variance weighted	209	0.0418788	0.0177	1.04 (1.01, 1.08)	0.0179799	0.0392288
mvIR_NGWAMA	PCOS	MR Egger	333	0.0124108	0.0417172	1.01 (0.93, 1.10)	0.766272	NA
mvIR_NGWAMA	PCOS	Weighted median	333	0.012192	0.0366075	1.01 (0.94, 1.09)	0.739099	NA
mvIR_NGWAMA	PCOS	Simple mode	333	0.0256141	0.0981228	1.03 (0.85, 1.24)	0.794223	NA
mvIR_NGWAMA	PCOS	Weighted mode	333	-0.0415027	0.0376384	0.96 (0.89, 1.03)	0.270971	NA
mvIR_NGWAMA	PCOS	Inverse variance weighted	333	0.102236	0.0252202	1.11 (1.05, 1.16)	5.04066e-05	0.000205917
mvIR_MTAG	PCOS	MR Egger	194	0.0315952	0.0658147	1.03 (0.91, 1.17)	0.631729	NA
mvIR_MTAG	PCOS	Weighted median	194	0.0331307	0.0419298	1.03 (0.95, 1.12)	0.429442	NA
mvIR_MTAG	PCOS	Simple mode	194	0.0539745	0.102741	1.06 (0.86, 1.29)	0.599947	NA
mvIR_MTAG	PCOS	Weighted mode	194	-0.00801768	0.0541084	0.99 (0.89, 1.10)	0.882357	NA
mvIR_MTAG	PCOS	Inverse variance weighted	194	0.152607	0.0334986	1.16 (1.09, 1.24)	5.22324e-06	2.57144e-05
HOMA-IR	Hypertension	MR Egger	13	0.419173	0.550341	1.52 (0.52, 4.47)	0.462281	NA
HOMA-IR	Hypertension	Weighted median	13	0.0549519	0.197143	1.06 (0.72, 1.55)	0.780443	NA
HOMA-IR	Hypertension	Simple mode	13	0.2165	0.310576	1.24 (0.68, 2.28)	0.499029	NA
HOMA-IR	Hypertension	Weighted mode	13	0.238768	0.283696	1.27 (0.73, 2.21)	0.416451	NA
HOMA-IR	Hypertension	Inverse variance weighted	13	-0.0134517	0.153301	0.99 (0.73, 1.33)	0.930078	0.973981
ISI*	Hypertension	MR Egger	8	0.0765743	0.435417	1.08 (0.46, 2.53)	0.866186	NA
ISI*	Hypertension	Weighted median	8	0.260158	0.126375	1.30 (1.01, 1.66)	0.0395313	NA
ISI*	Hypertension	Simple mode	8	0.0316478	0.250341	1.03 (0.63, 1.69)	0.902955	NA
ISI*	Hypertension	Weighted mode	8	0.444753	0.176872	1.56 (1.10, 2.21)	0.0401291	NA
ISI*	Hypertension	Inverse variance weighted	8	0.198831	0.135112	1.22 (0.94, 1.59)	0.141128	0.233591
Fins	Hypertension	MR Egger	38	0.969056	0.577674	2.64 (0.85, 8.18)	0.102105	NA
Fins	Hypertension	Weighted median	38	1.01628	0.199723	2.76 (1.87, 4.09)	3.6101e-07	NA
Fins	Hypertension	Simple mode	38	1.20958	0.386355	3.35 (1.57, 7.15)	0.00339775	NA
Fins	Hypertension	Weighted mode	38	1.20958	0.316538	3.35 (1.80, 6.23)	0.000491594	NA
Fins	Hypertension	Inverse variance weighted	38	0.616676	0.17958	1.85 (1.30, 2.63)	0.000594764	0.0017296
TG:HDL-C	Hypertension	MR Egger	205	0.0342834	0.0475782	1.03 (0.94, 1.14)	0.472003	NA
TG:HDL-C	Hypertension	Weighted median	205	0.180657	0.0335692	1.20 (1.12, 1.28)	7.38137e-08	NA
TG:HDL-C	Hypertension	Simple mode	205	0.204683	0.102665	1.23 (1.00, 1.50)	0.0475162	NA
TG:HDL-C	Hypertension	Weighted mode	205	0.115583	0.0311405	1.12 (1.06, 1.19)	0.000265582	NA
TG:HDL-C	Hypertension	Inverse variance weighted	205	0.177787	0.0311252	1.19 (1.12, 1.27)	1.11667e-08	7.65716e-08
mvIR_NGWAMA	Hypertension	MR Egger	323	0.134345	0.0739853	1.14 (0.99, 1.32)	0.0703283	NA
mvIR_NGWAMA	Hypertension	Weighted median	323	0.297474	0.0556446	1.35 (1.21, 1.50)	8.99352e-08	NA
mvIR_NGWAMA	Hypertension	Simple mode	323	0.213874	0.160737	1.24 (0.90, 1.70)	0.184266	NA
mvIR_NGWAMA	Hypertension	Weighted mode	323	0.189101	0.0561639	1.21 (1.08, 1.35)	0.000852091	NA
mvIR_NGWAMA	Hypertension	Inverse variance weighted	323	0.334269	0.0451451	1.40 (1.28, 1.53)	1.31827e-13	1.80791e-12
mvIR_MTAG	Hypertension	MR Egger	191	0.00420843	0.100054	1.00 (0.83, 1.22)	0.966494	NA
mvIR_MTAG	Hypertension	Weighted median	191	0.232449	0.058912	1.26 (1.12, 1.42)	7.95655e-05	NA
mvIR_MTAG	Hypertension	Simple mode	191	0.248607	0.171811	1.28 (0.92, 1.80)	0.149551	NA
mvIR_MTAG	Hypertension	Weighted mode	191	0.130993	0.0774587	1.14 (0.98, 1.33)	0.0924519	NA
mvIR_MTAG	Hypertension	Inverse variance weighted	191	0.36385	0.0528345	1.44 (1.30, 1.60)	5.7145e-12	5.48592e-11
HOMA-IR	CHD	MR Egger	13	-0.171235	0.371506	0.84 (0.41, 1.75)	0.653834	NA
HOMA-IR	CHD	Weighted median	13	-0.138259	0.162321	0.87 (0.63, 1.20)	0.394346	NA
HOMA-IR	CHD	Simple mode	13	-0.2919	0.297171	0.75 (0.42, 1.34)	0.345359	NA
HOMA-IR	CHD	Weighted mode	13	-0.235589	0.248091	0.79 (0.49, 1.28)	0.361045	NA
HOMA-IR	CHD	Inverse variance weighted	13	-0.0327034	0.123542	0.97 (0.76, 1.23)	0.79123	0.86316
ISI*	CHD	MR Egger	8	0.0808242	0.298136	1.08 (0.60, 1.94)	0.795401	NA
ISI*	CHD	Weighted median	8	0.393243	0.120638	1.48 (1.17, 1.88)	0.00111531	NA
ISI*	CHD	Simple mode	8	0.469629	0.21462	1.60 (1.05, 2.44)	0.064852	NA
ISI*	CHD	Weighted mode	8	0.498603	0.176185	1.65 (1.17, 2.33)	0.0254063	NA
ISI*	CHD	Inverse variance weighted	8	0.384184	0.0970292	1.47 (1.21, 1.78)	7.51163e-05	0.000297671
Fins	CHD	MR Egger	37	-0.0692031	0.544491	0.93 (0.32, 2.71)	0.899591	NA
Fins	CHD	Weighted median	37	0.747609	0.185366	2.11 (1.47, 3.04)	5.50345e-05	NA
Fins	CHD	Simple mode	37	0.803436	0.41072	2.23 (1.00, 5.00)	0.0582392	NA
Fins	CHD	Weighted mode	37	0.746108	0.370253	2.11 (1.02, 4.36)	0.0514052	NA
Fins	CHD	Inverse variance weighted	37	0.741507	0.175899	2.10 (1.49, 2.96)	2.49205e-05	0.000108744
TG:HDL-C	CHD	MR Egger	209	0.104768	0.0506287	1.11 (1.01, 1.23)	0.0397552	NA
TG:HDL-C	CHD	Weighted median	209	0.139608	0.0380722	1.15 (1.07, 1.24)	0.000245477	NA
TG:HDL-C	CHD	Simple mode	209	0.3336	0.110854	1.40 (1.12, 1.73)	0.00294144	NA
TG:HDL-C	CHD	Weighted mode	209	0.146545	0.0410757	1.16 (1.07, 1.25)	0.000447041	NA
TG:HDL-C	CHD	Inverse variance weighted	209	0.227877	0.0314498	1.26 (1.18, 1.34)	4.30093e-13	5.16112e-12
mvIR_NGWAMA	CHD	MR Egger	337	0.246016	0.0745328	1.28 (1.11, 1.48)	0.00106804	NA
mvIR_NGWAMA	CHD	Weighted median	337	0.341745	0.0543985	1.41 (1.27, 1.57)	3.3372e-10	NA
mvIR_NGWAMA	CHD	Simple mode	337	0.652385	0.158346	1.92 (1.41, 2.62)	4.77585e-05	NA
mvIR_NGWAMA	CHD	Weighted mode	337	0.339361	0.0709469	1.40 (1.22, 1.61)	2.58536e-06	NA
mvIR_NGWAMA	CHD	Inverse variance weighted	337	0.394051	0.043711	1.48 (1.36, 1.62)	1.97005e-19	6.30417e-18
mvIR_MTAG	CHD	MR Egger	194	0.222076	0.103442	1.25 (1.02, 1.53)	0.0330588	NA
mvIR_MTAG	CHD	Weighted median	194	0.360086	0.0632446	1.43 (1.27, 1.62)	1.24427e-08	NA
mvIR_MTAG	CHD	Simple mode	194	0.494967	0.171298	1.64 (1.17, 2.29)	0.00429991	NA
mvIR_MTAG	CHD	Weighted mode	194	0.373849	0.0993207	1.45 (1.20, 1.77)	0.000221768	NA
mvIR_MTAG	CHD	Inverse variance weighted	194	0.415014	0.052351	1.51 (1.37, 1.68)	2.23557e-15	4.29229e-14
HOMA-IR	Myocardial infarction	MR Egger	13	-0.200285	0.423451	0.82 (0.36, 1.88)	0.645472	NA
HOMA-IR	Myocardial infarction	Weighted median	13	0.0634887	0.181295	1.07 (0.75, 1.52)	0.726192	NA
HOMA-IR	Myocardial infarction	Simple mode	13	0.135957	0.32172	1.15 (0.61, 2.15)	0.680065	NA
HOMA-IR	Myocardial infarction	Weighted mode	13	0.116004	0.320341	1.12 (0.60, 2.10)	0.723554	NA
HOMA-IR	Myocardial infarction	Inverse variance weighted	13	-0.0529763	0.138818	0.95 (0.72, 1.24)	0.702741	0.7973
ISI*	Myocardial infarction	MR Egger	8	0.0271355	0.434108	1.03 (0.44, 2.41)	0.952188	NA
ISI*	Myocardial infarction	Weighted median	8	0.406569	0.121876	1.50 (1.18, 1.91)	0.000850144	NA
ISI*	Myocardial infarction	Simple mode	8	0.461228	0.185299	1.59 (1.10, 2.28)	0.0416512	NA
ISI*	Myocardial infarction	Weighted mode	8	0.479007	0.158744	1.61 (1.18, 2.20)	0.0194553	NA
ISI*	Myocardial infarction	Inverse variance weighted	8	0.304761	0.132646	1.36 (1.05, 1.76)	0.021587	0.0465196
Fins	Myocardial infarction	MR Egger	37	-0.150157	0.515424	0.86 (0.31, 2.36)	0.772521	NA
Fins	Myocardial infarction	Weighted median	37	0.506674	0.197018	1.66 (1.13, 2.44)	0.0101197	NA
Fins	Myocardial infarction	Simple mode	37	1.2478	0.440642	3.48 (1.47, 8.26)	0.00753199	NA
Fins	Myocardial infarction	Weighted mode	37	0.337522	0.414974	1.40 (0.62, 3.16)	0.42136	NA
Fins	Myocardial infarction	Inverse variance weighted	37	0.632939	0.166416	1.88 (1.36, 2.61)	0.000142746	0.000517118
TG:HDL-C	Myocardial infarction	MR Egger	207	0.105657	0.0527234	1.11 (1.00, 1.23)	0.0463871	NA
TG:HDL-C	Myocardial infarction	Weighted median	207	0.152999	0.0388893	1.17 (1.08, 1.26)	8.34694e-05	NA
TG:HDL-C	Myocardial infarction	Simple mode	207	0.284077	0.102715	1.33 (1.09, 1.62)	0.0061963	NA
TG:HDL-C	Myocardial infarction	Weighted mode	207	0.158063	0.0409519	1.17 (1.08, 1.27)	0.000151873	NA
TG:HDL-C	Myocardial infarction	Inverse variance weighted	207	0.221146	0.0327016	1.25 (1.17, 1.33)	1.35585e-11	1.18328e-10
mvIR_NGWAMA	Myocardial infarction	MR Egger	332	0.232207	0.0799196	1.26 (1.08, 1.48)	0.00391425	NA
mvIR_NGWAMA	Myocardial infarction	Weighted median	332	0.294623	0.0593862	1.34 (1.20, 1.51)	7.00779e-07	NA
mvIR_NGWAMA	Myocardial infarction	Simple mode	332	0.556081	0.144192	1.74 (1.31, 2.31)	0.000138204	NA
mvIR_NGWAMA	Myocardial infarction	Weighted mode	332	0.331509	0.0623625	1.39 (1.23, 1.57)	1.95635e-07	NA
mvIR_NGWAMA	Myocardial infarction	Inverse variance weighted	332	0.364731	0.0466498	1.44 (1.31, 1.58)	5.34636e-15	9.33183e-14
mvIR_MTAG	Myocardial infarction	MR Egger	194	0.259631	0.107526	1.30 (1.05, 1.60)	0.0166907	NA
mvIR_MTAG	Myocardial infarction	Weighted median	194	0.354024	0.0641726	1.42 (1.26, 1.62)	3.45322e-08	NA
mvIR_MTAG	Myocardial infarction	Simple mode	194	0.427802	0.158184	1.53 (1.12, 2.09)	0.00745325	NA
mvIR_MTAG	Myocardial infarction	Weighted mode	194	0.345261	0.090279	1.41 (1.18, 1.69)	0.000176891	NA
mvIR_MTAG	Myocardial infarction	Inverse variance weighted	194	0.388792	0.0540765	1.48 (1.33, 1.64)	6.4947e-13	7.33519e-12
HOMA-IR	Stroke	MR Egger	13	-0.471742	0.317147	0.62 (0.34, 1.16)	0.164989	NA
HOMA-IR	Stroke	Weighted median	13	-0.188186	0.145385	0.83 (0.62, 1.10)	0.195528	NA
HOMA-IR	Stroke	Simple mode	13	-0.216651	0.249347	0.81 (0.49, 1.31)	0.401961	NA
HOMA-IR	Stroke	Weighted mode	13	-0.232093	0.187522	0.79 (0.55, 1.15)	0.239503	NA
HOMA-IR	Stroke	Inverse variance weighted	13	-0.0735137	0.115235	0.93 (0.74, 1.16)	0.52351	0.658906
ISI*	Stroke	MR Egger	8	0.0306109	0.206645	1.03 (0.69, 1.55)	0.887091	NA
ISI*	Stroke	Weighted median	8	0.0892714	0.0854986	1.09 (0.92, 1.29)	0.296426	NA
ISI*	Stroke	Simple mode	8	0.101281	0.140371	1.11 (0.84, 1.46)	0.493975	NA
ISI*	Stroke	Weighted mode	8	0.0932906	0.127866	1.10 (0.85, 1.41)	0.489327	NA
ISI*	Stroke	Inverse variance weighted	8	0.0514998	0.069029	1.05 (0.92, 1.21)	0.45563	0.600476
Fins	Stroke	MR Egger	38	0.320176	0.448448	1.38 (0.57, 3.32)	0.479853	NA
Fins	Stroke	Weighted median	38	0.218674	0.15151	1.24 (0.92, 1.67)	0.148936	NA
Fins	Stroke	Simple mode	38	0.766736	0.326234	2.15 (1.14, 4.08)	0.0242027	NA
Fins	Stroke	Weighted mode	38	0.0613138	0.246191	1.06 (0.66, 1.72)	0.804699	NA
Fins	Stroke	Inverse variance weighted	38	0.237334	0.140133	1.27 (0.96, 1.67)	0.0903356	0.157677
TG:HDL-C	Stroke	MR Egger	204	-0.0207782	0.0357311	0.98 (0.91, 1.05)	0.561541	NA
TG:HDL-C	Stroke	Weighted median	204	0.0379473	0.0278087	1.04 (0.98, 1.10)	0.172383	NA
TG:HDL-C	Stroke	Simple mode	204	0.116557	0.0612182	1.12 (1.00, 1.27)	0.0583304	NA
TG:HDL-C	Stroke	Weighted mode	204	0.0365991	0.0255078	1.04 (0.99, 1.09)	0.152877	NA
TG:HDL-C	Stroke	Inverse variance weighted	204	0.0611811	0.021965	1.06 (1.02, 1.11)	0.00534622	0.0129934
mvIR_NGWAMA	Stroke	MR Egger	334	-0.0153006	0.0528098	0.98 (0.89, 1.09)	0.772203	NA
mvIR_NGWAMA	Stroke	Weighted median	334	0.0761215	0.0423539	1.08 (0.99, 1.17)	0.0722925	NA
mvIR_NGWAMA	Stroke	Simple mode	334	0.0917803	0.0979811	1.10 (0.90, 1.33)	0.349584	NA
mvIR_NGWAMA	Stroke	Weighted mode	334	0.0619942	0.04655	1.06 (0.97, 1.17)	0.183844	NA
mvIR_NGWAMA	Stroke	Inverse variance weighted	334	0.126215	0.0307855	1.13 (1.07, 1.21)	4.13469e-05	0.000176413
mvIR_MTAG	Stroke	MR Egger	192	-0.0557746	0.0721429	0.95 (0.82, 1.09)	0.440416	NA
mvIR_MTAG	Stroke	Weighted median	192	0.0769518	0.0468865	1.08 (0.99, 1.18)	0.100748	NA
mvIR_MTAG	Stroke	Simple mode	192	0.149451	0.112473	1.16 (0.93, 1.45)	0.185508	NA
mvIR_MTAG	Stroke	Weighted mode	192	0.092998	0.0658792	1.10 (0.96, 1.25)	0.159681	NA
mvIR_MTAG	Stroke	Inverse variance weighted	192	0.140311	0.037102	1.15 (1.07, 1.24)	0.000155718	0.000553663
HOMA-IR	Heart failure	MR Egger	12	0.132801	0.357897	1.14 (0.57, 2.30)	0.718333	NA
HOMA-IR	Heart failure	Weighted median	12	-0.26	0.157312	0.77 (0.57, 1.05)	0.098378	NA
HOMA-IR	Heart failure	Simple mode	12	-0.353154	0.260929	0.70 (0.42, 1.17)	0.20307	NA
HOMA-IR	Heart failure	Weighted mode	12	-0.281068	0.235114	0.75 (0.48, 1.20)	0.257046	NA
HOMA-IR	Heart failure	Inverse variance weighted	12	-0.216665	0.115173	0.81 (0.64, 1.01)	0.0599432	0.111739
ISI*	Heart failure	MR Egger	8	0.160181	0.19993	1.17 (0.79, 1.74)	0.453574	NA
ISI*	Heart failure	Weighted median	8	0.0701879	0.0805692	1.07 (0.92, 1.26)	0.383672	NA
ISI*	Heart failure	Simple mode	8	0.0966483	0.105599	1.10 (0.90, 1.35)	0.390504	NA
ISI*	Heart failure	Weighted mode	8	0.0781835	0.0937101	1.08 (0.90, 1.30)	0.431652	NA
ISI*	Heart failure	Inverse variance weighted	8	0.0366271	0.0662959	1.04 (0.91, 1.18)	0.58062	0.691363
Fins	Heart failure	MR Egger	35	-0.380706	0.362519	0.68 (0.34, 1.39)	0.30127	NA
Fins	Heart failure	Weighted median	35	-0.0141516	0.14605	0.99 (0.74, 1.31)	0.922809	NA
Fins	Heart failure	Simple mode	35	-0.0850793	0.307337	0.92 (0.50, 1.68)	0.783589	NA
Fins	Heart failure	Weighted mode	35	0.0234975	0.244017	1.02 (0.63, 1.65)	0.923852	NA
Fins	Heart failure	Inverse variance weighted	35	-0.0428291	0.117755	0.96 (0.76, 1.21)	0.716072	0.799336
TG:HDL-C	Heart failure	MR Egger	182	0.043432	0.0398271	1.04 (0.97, 1.13)	0.276945	NA
TG:HDL-C	Heart failure	Weighted median	182	0.0949478	0.02738	1.10 (1.04, 1.16)	0.000524785	NA
TG:HDL-C	Heart failure	Simple mode	182	0.161899	0.0666189	1.18 (1.03, 1.34)	0.0160657	NA
TG:HDL-C	Heart failure	Weighted mode	182	0.126361	0.0281793	1.13 (1.07, 1.20)	1.29682e-05	NA
TG:HDL-C	Heart failure	Inverse variance weighted	182	0.0920251	0.0246056	1.10 (1.04, 1.15)	0.000184016	0.000630913
mvIR_NGWAMA	Heart failure	MR Egger	303	0.0681729	0.0586625	1.07 (0.95, 1.20)	0.246107	NA
mvIR_NGWAMA	Heart failure	Weighted median	303	0.157481	0.0433252	1.17 (1.08, 1.27)	0.000278137	NA
mvIR_NGWAMA	Heart failure	Simple mode	303	0.137541	0.111833	1.15 (0.92, 1.43)	0.2197	NA
mvIR_NGWAMA	Heart failure	Weighted mode	303	0.220366	0.0502566	1.25 (1.13, 1.38)	1.60481e-05	NA
mvIR_NGWAMA	Heart failure	Inverse variance weighted	303	0.165726	0.0349698	1.18 (1.10, 1.26)	2.14644e-06	1.11383e-05
mvIR_MTAG	Heart failure	MR Egger	195	0.096042	0.0782561	1.10 (0.94, 1.28)	0.221213	NA
mvIR_MTAG	Heart failure	Weighted median	195	0.203028	0.0479867	1.23 (1.12, 1.35)	2.32741e-05	NA
mvIR_MTAG	Heart failure	Simple mode	195	0.218551	0.116325	1.24 (0.99, 1.56)	0.0617723	NA
mvIR_MTAG	Heart failure	Weighted mode	195	0.249445	0.065933	1.28 (1.13, 1.46)	0.000206097	NA
mvIR_MTAG	Heart failure	Inverse variance weighted	195	0.14741	0.039647	1.16 (1.07, 1.25)	0.000200762	0.000676251
HOMA-IR	Atrial fibrillation	MR Egger	12	-0.315762	0.339202	0.73 (0.38, 1.42)	0.373835	NA
HOMA-IR	Atrial fibrillation	Weighted median	12	-0.0453367	0.128979	0.96 (0.74, 1.23)	0.72521	NA
HOMA-IR	Atrial fibrillation	Simple mode	12	-0.0874072	0.17542	0.92 (0.65, 1.29)	0.628103	NA
HOMA-IR	Atrial fibrillation	Weighted mode	12	-0.078374	0.155004	0.92 (0.68, 1.25)	0.623097	NA
HOMA-IR	Atrial fibrillation	Inverse variance weighted	12	0.000741896	0.110488	1.00 (0.81, 1.24)	0.994642	0.994642
ISI*	Atrial fibrillation	MR Egger	8	-0.400474	0.247684	0.67 (0.41, 1.09)	0.157033	NA
ISI*	Atrial fibrillation	Weighted median	8	-0.153136	0.0745221	0.86 (0.74, 0.99)	0.0398875	NA
ISI*	Atrial fibrillation	Simple mode	8	-0.101781	0.103826	0.90 (0.74, 1.11)	0.359596	NA
ISI*	Atrial fibrillation	Weighted mode	8	-0.148738	0.0883811	0.86 (0.72, 1.02)	0.136269	NA
ISI*	Atrial fibrillation	Inverse variance weighted	8	-0.122638	0.0862543	0.88 (0.75, 1.05)	0.155077	0.254486
Fins	Atrial fibrillation	MR Egger	35	-0.189228	0.475709	0.83 (0.33, 2.10)	0.693353	NA
Fins	Atrial fibrillation	Weighted median	35	-0.132368	0.131338	0.88 (0.68, 1.13)	0.313528	NA
Fins	Atrial fibrillation	Simple mode	35	-0.252484	0.240718	0.78 (0.48, 1.25)	0.301632	NA
Fins	Atrial fibrillation	Weighted mode	35	-0.177755	0.181778	0.84 (0.59, 1.20)	0.335046	NA
Fins	Atrial fibrillation	Inverse variance weighted	35	-0.126066	0.152798	0.88 (0.65, 1.19)	0.409344	0.555465
TG:HDL-C	Atrial fibrillation	MR Egger	186	-0.0421728	0.0363564	0.96 (0.89, 1.03)	0.247558	NA
TG:HDL-C	Atrial fibrillation	Weighted median	186	-0.00698528	0.0228253	0.99 (0.95, 1.04)	0.75958	NA
TG:HDL-C	Atrial fibrillation	Simple mode	186	-0.0274694	0.0455316	0.97 (0.89, 1.06)	0.547046	NA
TG:HDL-C	Atrial fibrillation	Weighted mode	186	-0.00903158	0.0208741	0.99 (0.95, 1.03)	0.66576	NA
TG:HDL-C	Atrial fibrillation	Inverse variance weighted	186	0.000639847	0.0226279	1.00 (0.96, 1.05)	0.977441	0.98773
mvIR_NGWAMA	Atrial fibrillation	MR Egger	304	-0.0299224	0.053565	0.97 (0.87, 1.08)	0.576836	NA
mvIR_NGWAMA	Atrial fibrillation	Weighted median	304	-0.0403619	0.0349986	0.96 (0.90, 1.03)	0.24881	NA
mvIR_NGWAMA	Atrial fibrillation	Simple mode	304	-0.00696861	0.0794317	0.99 (0.85, 1.16)	0.930149	NA
mvIR_NGWAMA	Atrial fibrillation	Weighted mode	304	-0.0226254	0.0365747	0.98 (0.91, 1.05)	0.53664	NA
mvIR_NGWAMA	Atrial fibrillation	Inverse variance weighted	304	-0.0203454	0.0320119	0.98 (0.92, 1.04)	0.525065	0.658906
mvIR_MTAG	Atrial fibrillation	MR Egger	196	-0.0314244	0.0776292	0.97 (0.83, 1.13)	0.68607	NA
mvIR_MTAG	Atrial fibrillation	Weighted median	196	-0.0556173	0.0409003	0.95 (0.87, 1.02)	0.173885	NA
mvIR_MTAG	Atrial fibrillation	Simple mode	196	-0.0804367	0.0994739	0.92 (0.76, 1.12)	0.419719	NA
mvIR_MTAG	Atrial fibrillation	Weighted mode	196	-0.0348968	0.0499389	0.97 (0.88, 1.07)	0.485516	NA
mvIR_MTAG	Atrial fibrillation	Inverse variance weighted	196	-0.0398887	0.0391807	0.96 (0.89, 1.04)	0.308645	0.452365
HOMA-IR	PAD	MR Egger	13	0.153306	1.08838	1.17 (0.14, 9.84)	0.890529	NA
HOMA-IR	PAD	Weighted median	13	0.0346442	0.354355	1.04 (0.52, 2.07)	0.922117	NA
HOMA-IR	PAD	Simple mode	13	0.129755	0.685323	1.14 (0.30, 4.36)	0.852995	NA
HOMA-IR	PAD	Weighted mode	13	-0.47055	0.615232	0.62 (0.19, 2.09)	0.459148	NA
HOMA-IR	PAD	Inverse variance weighted	13	0.00872432	0.293961	1.01 (0.57, 1.79)	0.976323	0.98773
ISI*	PAD	MR Egger	8	0.311036	0.449972	1.36 (0.57, 3.30)	0.515259	NA
ISI*	PAD	Weighted median	8	0.441169	0.191369	1.55 (1.07, 2.26)	0.0211478	NA
ISI*	PAD	Simple mode	8	0.487534	0.276471	1.63 (0.95, 2.80)	0.121196	NA
ISI*	PAD	Weighted mode	8	0.439864	0.272448	1.55 (0.91, 2.65)	0.150456	NA
ISI*	PAD	Inverse variance weighted	8	0.436694	0.149265	1.55 (1.16, 2.07)	0.00343769	0.0086847
Fins	PAD	MR Egger	38	0.862337	1.00754	2.37 (0.33, 17.07)	0.397721	NA
Fins	PAD	Weighted median	38	1.01025	0.366763	2.75 (1.34, 5.64)	0.00587817	NA
Fins	PAD	Simple mode	38	0.864583	0.706004	2.37 (0.60, 9.47)	0.22846	NA
Fins	PAD	Weighted mode	38	0.99157	0.582368	2.70 (0.86, 8.44)	0.0970213	NA
Fins	PAD	Inverse variance weighted	38	0.881245	0.311216	2.41 (1.31, 4.44)	0.00463135	0.0115483
TG:HDL-C	PAD	MR Egger	205	0.18243	0.0692057	1.20 (1.05, 1.37)	0.00903571	NA
TG:HDL-C	PAD	Weighted median	205	0.198818	0.0584955	1.22 (1.09, 1.37)	0.00067668	NA
TG:HDL-C	PAD	Simple mode	205	0.309672	0.121803	1.36 (1.07, 1.73)	0.0117519	NA
TG:HDL-C	PAD	Weighted mode	205	0.212379	0.0531518	1.24 (1.11, 1.37)	9.00656e-05	NA
TG:HDL-C	PAD	Inverse variance weighted	205	0.262599	0.0439139	1.30 (1.19, 1.42)	2.23349e-09	1.71532e-08
mvIR_NGWAMA	PAD	MR Egger	323	0.349074	0.102146	1.42 (1.16, 1.73)	0.000713594	NA
mvIR_NGWAMA	PAD	Weighted median	323	0.372477	0.0939483	1.45 (1.21, 1.74)	7.34874e-05	NA
mvIR_NGWAMA	PAD	Simple mode	323	0.643593	0.198897	1.90 (1.29, 2.81)	0.00133906	NA
mvIR_NGWAMA	PAD	Weighted mode	323	0.415898	0.078997	1.52 (1.30, 1.77)	2.5709e-07	NA
mvIR_NGWAMA	PAD	Inverse variance weighted	323	0.438848	0.0613491	1.55 (1.38, 1.75)	8.47193e-13	9.03672e-12
mvIR_MTAG	PAD	MR Egger	191	0.458386	0.151731	1.58 (1.17, 2.13)	0.00286774	NA
mvIR_MTAG	PAD	Weighted median	191	0.510328	0.104275	1.67 (1.36, 2.04)	9.87719e-07	NA
mvIR_MTAG	PAD	Simple mode	191	0.493675	0.219703	1.64 (1.07, 2.52)	0.0257893	NA
mvIR_MTAG	PAD	Weighted mode	191	0.493675	0.149025	1.64 (1.22, 2.19)	0.00110615	NA
mvIR_MTAG	PAD	Inverse variance weighted	191	0.52104	0.0766896	1.68 (1.45, 1.96)	1.08956e-11	9.96167e-11
HOMA-IR	Resilience	MR Egger	12	0.408753	0.215133	1.50 (0.99, 2.29)	0.0866226	NA
HOMA-IR	Resilience	Weighted median	12	0.0663796	0.0706779	1.07 (0.93, 1.23)	0.347636	NA
HOMA-IR	Resilience	Simple mode	12	0.0908828	0.089586	1.10 (0.92, 1.31)	0.33215	NA
HOMA-IR	Resilience	Weighted mode	12	0.0880441	0.0857036	1.09 (0.92, 1.29)	0.326336	NA
HOMA-IR	Resilience	Inverse variance weighted	12	0.00674242	0.0760169	1.01 (0.87, 1.17)	0.929323	0.973981
ISI*	Resilience	MR Egger	8	-0.0779	0.102236	0.93 (0.76, 1.13)	0.474956	NA
ISI*	Resilience	Weighted median	8	-0.0688886	0.0374446	0.93 (0.87, 1.00)	0.0658049	NA
ISI*	Resilience	Simple mode	8	-0.00691563	0.0634289	0.99 (0.88, 1.12)	0.916239	NA
ISI*	Resilience	Weighted mode	8	-0.0822107	0.0460691	0.92 (0.84, 1.01)	0.117518	NA
ISI*	Resilience	Inverse variance weighted	8	-0.0510536	0.0327248	0.95 (0.89, 1.01)	0.11874	0.201752
Fins	Resilience	MR Egger	35	-0.0924401	0.228003	0.91 (0.58, 1.43)	0.687776	NA
Fins	Resilience	Weighted median	35	-0.0991213	0.0715591	0.91 (0.79, 1.04)	0.166001	NA
Fins	Resilience	Simple mode	35	-0.0293943	0.175955	0.97 (0.69, 1.37)	0.868316	NA
Fins	Resilience	Weighted mode	35	-0.172659	0.19084	0.84 (0.58, 1.22)	0.371976	NA
Fins	Resilience	Inverse variance weighted	35	-0.0828428	0.0728151	0.92 (0.80, 1.06)	0.25524	0.382859
TG:HDL-C	Resilience	MR Egger	203	0.00243985	0.0156317	1.00 (0.97, 1.03)	0.876124	NA
TG:HDL-C	Resilience	Weighted median	203	-0.0292421	0.0107616	0.97 (0.95, 0.99)	0.00658236	NA
TG:HDL-C	Resilience	Simple mode	203	-0.0476951	0.0220227	0.95 (0.91, 1.00)	0.0315043	NA
TG:HDL-C	Resilience	Weighted mode	203	-0.0304547	0.0108662	0.97 (0.95, 0.99)	0.00556105	NA
TG:HDL-C	Resilience	Inverse variance weighted	203	-0.0457945	0.00981786	0.96 (0.94, 0.97)	3.09497e-06	1.56377e-05
mvIR_NGWAMA	Resilience	MR Egger	340	-0.00383084	0.0229916	1.00 (0.95, 1.04)	0.86777	NA
mvIR_NGWAMA	Resilience	Weighted median	340	-0.0637482	0.0166461	0.94 (0.91, 0.97)	0.000128343	NA
mvIR_NGWAMA	Resilience	Simple mode	340	-0.0731522	0.0363718	0.93 (0.87, 1.00)	0.0450917	NA
mvIR_NGWAMA	Resilience	Weighted mode	340	-0.0555812	0.0170459	0.95 (0.91, 0.98)	0.00122432	NA
mvIR_NGWAMA	Resilience	Inverse variance weighted	340	-0.0964274	0.0138033	0.91 (0.88, 0.93)	2.83214e-12	2.86195e-11
mvIR_MTAG	Resilience	MR Egger	195	-0.00816476	0.0317874	0.99 (0.93, 1.06)	0.797564	NA
mvIR_MTAG	Resilience	Weighted median	195	-0.074323	0.0189746	0.93 (0.89, 0.96)	8.96689e-05	NA
mvIR_MTAG	Resilience	Simple mode	195	-0.0698709	0.0352443	0.93 (0.87, 1.00)	0.0488379	NA
mvIR_MTAG	Resilience	Weighted mode	195	-0.0698709	0.0209418	0.93 (0.90, 0.97)	0.00101699	NA
mvIR_MTAG	Resilience	Inverse variance weighted	195	-0.0907804	0.0165124	0.91 (0.88, 0.94)	3.84718e-08	2.5471e-07
HOMA-IR	Healthspan	MR Egger	13	-0.158735	0.226216	0.85 (0.55, 1.33)	0.497446	NA
HOMA-IR	Healthspan	Weighted median	13	0.0102114	0.0920229	1.01 (0.84, 1.21)	0.911643	NA
HOMA-IR	Healthspan	Simple mode	13	0.121432	0.162482	1.13 (0.82, 1.55)	0.469241	NA
HOMA-IR	Healthspan	Weighted mode	13	0.114654	0.156408	1.12 (0.83, 1.52)	0.477609	NA
HOMA-IR	Healthspan	Inverse variance weighted	13	-0.034646	0.0680025	0.97 (0.85, 1.10)	0.610415	0.714632
ISI*	Healthspan	MR Egger	8	-0.0813524	0.170782	0.92 (0.66, 1.29)	0.650673	NA
ISI*	Healthspan	Weighted median	8	-0.167817	0.0587701	0.85 (0.75, 0.95)	0.00429704	NA
ISI*	Healthspan	Simple mode	8	-0.0997638	0.0999894	0.91 (0.74, 1.10)	0.351636	NA
ISI*	Healthspan	Weighted mode	8	-0.101958	0.108595	0.90 (0.73, 1.12)	0.37905	NA
ISI*	Healthspan	Inverse variance weighted	8	-0.194034	0.0565695	0.82 (0.74, 0.92)	0.000603557	0.0017296
Fins	Healthspan	MR Egger	35	-0.893938	0.49591	0.41 (0.15, 1.08)	0.0805875	NA
Fins	Healthspan	Weighted median	35	-0.601101	0.102117	0.55 (0.45, 0.67)	3.94767e-09	NA
Fins	Healthspan	Simple mode	35	-0.819904	0.21155	0.44 (0.29, 0.67)	0.000461742	NA
Fins	Healthspan	Weighted mode	35	-0.683503	0.153975	0.50 (0.37, 0.68)	9.05165e-05	NA
Fins	Healthspan	Inverse variance weighted	35	-0.364761	0.161487	0.69 (0.51, 0.95)	0.0238978	0.0491142
TG:HDL-C	Healthspan	MR Egger	204	0.00752387	0.022766	1.01 (0.96, 1.05)	0.741375	NA
TG:HDL-C	Healthspan	Weighted median	204	-0.0536025	0.0162708	0.95 (0.92, 0.98)	0.000986322	NA
TG:HDL-C	Healthspan	Simple mode	204	-0.139603	0.043873	0.87 (0.80, 0.95)	0.00169239	NA
TG:HDL-C	Healthspan	Weighted mode	204	-0.0431803	0.0180144	0.96 (0.92, 0.99)	0.0174369	NA
TG:HDL-C	Healthspan	Inverse variance weighted	204	-0.0870198	0.0148297	0.92 (0.89, 0.94)	4.41286e-09	3.13803e-08
mvIR_NGWAMA	Healthspan	MR Egger	345	-0.045031	0.0317032	0.96 (0.90, 1.02)	0.156402	NA
mvIR_NGWAMA	Healthspan	Weighted median	345	-0.122963	0.024739	0.88 (0.84, 0.93)	6.68112e-07	NA
mvIR_NGWAMA	Healthspan	Simple mode	345	-0.212112	0.0798832	0.81 (0.69, 0.95)	0.008293	NA
mvIR_NGWAMA	Healthspan	Weighted mode	345	-0.0856259	0.0279805	0.92 (0.87, 0.97)	0.00238569	NA
mvIR_NGWAMA	Healthspan	Inverse variance weighted	345	-0.163253	0.0192083	0.85 (0.82, 0.88)	1.91123e-17	4.30882e-16
mvIR_MTAG	Healthspan	MR Egger	196	-0.0664836	0.0461643	0.94 (0.85, 1.02)	0.151436	NA
mvIR_MTAG	Healthspan	Weighted median	196	-0.160505	0.0280927	0.85 (0.81, 0.90)	1.10728e-08	NA
mvIR_MTAG	Healthspan	Simple mode	196	-0.142177	0.0797933	0.87 (0.74, 1.01)	0.0763363	NA
mvIR_MTAG	Healthspan	Weighted mode	196	-0.134106	0.0371796	0.87 (0.81, 0.94)	0.000393561	NA
mvIR_MTAG	Healthspan	Inverse variance weighted	196	-0.180745	0.0239358	0.83 (0.80, 0.87)	4.31196e-14	6.36843e-13
HOMA-IR	Parental lifespan	MR Egger	13	0.231514	1.79755	1.26 (0.04, 42.72)	0.899845	NA
HOMA-IR	Parental lifespan	Weighted median	13	0.345611	0.720161	1.41 (0.34, 5.80)	0.631292	NA
HOMA-IR	Parental lifespan	Simple mode	13	0.652357	1.15183	1.92 (0.20, 18.36)	0.581584	NA
HOMA-IR	Parental lifespan	Weighted mode	13	0.593017	1.09156	1.81 (0.21, 15.37)	0.596887	NA
HOMA-IR	Parental lifespan	Inverse variance weighted	13	0.0513619	0.540624	1.05 (0.36, 3.04)	0.924311	0.973981
ISI*	Parental lifespan	MR Egger	8	0.794371	1.26019	2.21 (0.19, 26.16)	0.551696	NA
ISI*	Parental lifespan	Weighted median	8	-1.11046	0.4689	0.33 (0.13, 0.83)	0.0178741	NA
ISI*	Parental lifespan	Simple mode	8	-0.860007	0.850648	0.42 (0.08, 2.24)	0.345678	NA
ISI*	Parental lifespan	Weighted mode	8	-0.965507	0.66248	0.38 (0.10, 1.40)	0.188354	NA
ISI*	Parental lifespan	Inverse variance weighted	8	-0.822754	0.454261	0.44 (0.18, 1.07)	0.0701106	0.127952
Fins	Parental lifespan	MR Egger	35	-1.04258	2.34882	0.35 (0.00, 35.20)	0.660031	NA
Fins	Parental lifespan	Weighted median	35	-2.86692	0.787409	0.06 (0.01, 0.27)	0.000271626	NA
Fins	Parental lifespan	Simple mode	35	-2.43378	1.5451	0.09 (0.00, 1.81)	0.124481	NA
Fins	Parental lifespan	Weighted mode	35	-2.29939	1.14702	0.10 (0.01, 0.95)	0.0530151	NA
Fins	Parental lifespan	Inverse variance weighted	35	-2.76419	0.754494	0.06 (0.01, 0.28)	0.000248658	0.000809192
TG:HDL-C	Parental lifespan	MR Egger	198	-0.518314	0.220596	0.60 (0.39, 0.92)	0.019788	NA
TG:HDL-C	Parental lifespan	Weighted median	198	-0.653458	0.135192	0.52 (0.40, 0.68)	1.34113e-06	NA
TG:HDL-C	Parental lifespan	Simple mode	198	-0.557875	0.308692	0.57 (0.31, 1.05)	0.0722532	NA
TG:HDL-C	Parental lifespan	Weighted mode	198	-0.506766	0.122946	0.60 (0.47, 0.77)	5.53403e-05	NA
TG:HDL-C	Parental lifespan	Inverse variance weighted	198	-0.819236	0.135769	0.44 (0.34, 0.58)	1.5991e-09	1.27928e-08
mvIR_NGWAMA	Parental lifespan	MR Egger	337	-0.874529	0.303665	0.42 (0.23, 0.76)	0.00423384	NA
mvIR_NGWAMA	Parental lifespan	Weighted median	337	-1.24563	0.202681	0.29 (0.19, 0.43)	7.9579e-10	NA
mvIR_NGWAMA	Parental lifespan	Simple mode	337	-0.945715	0.474333	0.39 (0.15, 0.98)	0.0469844	NA
mvIR_NGWAMA	Parental lifespan	Weighted mode	337	-1.01841	0.200236	0.36 (0.24, 0.53)	6.08937e-07	NA
mvIR_NGWAMA	Parental lifespan	Inverse variance weighted	337	-1.52898	0.180036	0.22 (0.15, 0.31)	2.01976e-17	4.30882e-16
mvIR_MTAG	Parental lifespan	MR Egger	192	-1.16207	0.435394	0.31 (0.13, 0.73)	0.00826576	NA
mvIR_MTAG	Parental lifespan	Weighted median	192	-1.39597	0.222924	0.25 (0.16, 0.38)	3.79907e-10	NA
mvIR_MTAG	Parental lifespan	Simple mode	192	-1.37493	0.473182	0.25 (0.10, 0.64)	0.0040968	NA
mvIR_MTAG	Parental lifespan	Weighted mode	192	-1.37493	0.239103	0.25 (0.16, 0.40)	3.48172e-08	NA
mvIR_MTAG	Parental lifespan	Inverse variance weighted	192	-1.73303	0.222146	0.18 (0.11, 0.27)	6.12707e-15	9.80332e-14
HOMA-IR	90th percentile longevity	MR Egger	13	-0.366156	0.90633	0.69 (0.12, 4.10)	0.693957	NA
HOMA-IR	90th percentile longevity	Weighted median	13	0.0594705	0.3884	1.06 (0.50, 2.27)	0.878306	NA
HOMA-IR	90th percentile longevity	Simple mode	13	0.160336	0.661479	1.17 (0.32, 4.29)	0.812571	NA
HOMA-IR	90th percentile longevity	Weighted mode	13	0.160336	0.622429	1.17 (0.35, 3.98)	0.801082	NA
HOMA-IR	90th percentile longevity	Inverse variance weighted	13	0.247944	0.273495	1.28 (0.75, 2.19)	0.36463	0.514116
ISI*	90th percentile longevity	MR Egger	8	-0.148246	0.494685	0.86 (0.33, 2.27)	0.774534	NA
ISI*	90th percentile longevity	Weighted median	8	-0.0620481	0.198978	0.94 (0.64, 1.39)	0.755167	NA
ISI*	90th percentile longevity	Simple mode	8	-0.130692	0.298339	0.88 (0.49, 1.57)	0.674539	NA
ISI*	90th percentile longevity	Weighted mode	8	-0.0975355	0.249218	0.91 (0.56, 1.48)	0.707167	NA
ISI*	90th percentile longevity	Inverse variance weighted	8	-0.098367	0.160616	0.91 (0.66, 1.24)	0.540249	0.66538
Fins	90th percentile longevity	MR Egger	38	-0.162497	0.887719	0.85 (0.15, 4.84)	0.855786	NA
Fins	90th percentile longevity	Weighted median	38	0.250592	0.359438	1.28 (0.64, 2.60)	0.485692	NA
Fins	90th percentile longevity	Simple mode	38	0.136308	0.670256	1.15 (0.31, 4.26)	0.839963	NA
Fins	90th percentile longevity	Weighted mode	38	0.136308	0.51743	1.15 (0.42, 3.16)	0.793679	NA
Fins	90th percentile longevity	Inverse variance weighted	38	0.212561	0.282178	1.24 (0.71, 2.15)	0.451278	0.600476
TG:HDL-C	90th percentile longevity	MR Egger	211	-0.239631	0.0824007	0.79 (0.67, 0.92)	0.00402886	NA
TG:HDL-C	90th percentile longevity	Weighted median	211	-0.214274	0.0660407	0.81 (0.71, 0.92)	0.00117624	NA
TG:HDL-C	90th percentile longevity	Simple mode	211	-0.0780499	0.161314	0.92 (0.67, 1.27)	0.629005	NA
TG:HDL-C	90th percentile longevity	Weighted mode	211	-0.190766	0.0781235	0.83 (0.71, 0.96)	0.0154397	NA
TG:HDL-C	90th percentile longevity	Inverse variance weighted	211	-0.175617	0.0497148	0.84 (0.76, 0.92)	0.000411679	0.00125464
mvIR_NGWAMA	90th percentile longevity	MR Egger	341	-0.300383	0.126714	0.74 (0.58, 0.95)	0.01832	NA
mvIR_NGWAMA	90th percentile longevity	Weighted median	341	-0.340955	0.102527	0.71 (0.58, 0.87)	0.000882555	NA
mvIR_NGWAMA	90th percentile longevity	Simple mode	341	-0.0802854	0.234849	0.92 (0.58, 1.46)	0.732668	NA
mvIR_NGWAMA	90th percentile longevity	Weighted mode	341	-0.320049	0.120826	0.73 (0.57, 0.92)	0.00845365	NA
mvIR_NGWAMA	90th percentile longevity	Inverse variance weighted	341	-0.289793	0.0732396	0.75 (0.65, 0.86)	7.59682e-05	0.000297671
mvIR_MTAG	90th percentile longevity	MR Egger	194	-0.281716	0.171507	0.75 (0.54, 1.06)	0.102104	NA
mvIR_MTAG	90th percentile longevity	Weighted median	194	-0.225889	0.110785	0.80 (0.64, 0.99)	0.0414507	NA
mvIR_MTAG	90th percentile longevity	Simple mode	194	-0.170405	0.265898	0.84 (0.50, 1.42)	0.52237	NA
mvIR_MTAG	90th percentile longevity	Weighted mode	194	-0.27039	0.144944	0.76 (0.57, 1.01)	0.0636315	NA
mvIR_MTAG	90th percentile longevity	Inverse variance weighted	194	-0.271765	0.086529	0.76 (0.64, 0.90)	0.0016852	0.00449386
HOMA-IR	99th percentile longevity	MR Egger	13	-1.71685	1.80455	0.18 (0.01, 6.17)	0.36184	NA
HOMA-IR	99th percentile longevity	Weighted median	13	0.867576	0.662635	2.38 (0.65, 8.73)	0.190438	NA
HOMA-IR	99th percentile longevity	Simple mode	13	0.965981	1.10646	2.63 (0.30, 22.98)	0.399777	NA
HOMA-IR	99th percentile longevity	Weighted mode	13	0.989406	0.968461	2.69 (0.40, 17.95)	0.327113	NA
HOMA-IR	99th percentile longevity	Inverse variance weighted	13	0.511537	0.565469	1.67 (0.55, 5.05)	0.365664	0.514116
ISI*	99th percentile longevity	MR Egger	8	-0.620572	0.791052	0.54 (0.11, 2.53)	0.462592	NA
ISI*	99th percentile longevity	Weighted median	8	0.104912	0.315414	1.11 (0.60, 2.06)	0.739423	NA
ISI*	99th percentile longevity	Simple mode	8	0.115488	0.495768	1.12 (0.42, 2.97)	0.822467	NA
ISI*	99th percentile longevity	Weighted mode	8	-0.165572	0.435955	0.85 (0.36, 1.99)	0.715361	NA
ISI*	99th percentile longevity	Inverse variance weighted	8	0.118005	0.254387	1.13 (0.68, 1.85)	0.642733	0.743402
Fins	99th percentile longevity	MR Egger	38	-0.767618	1.1351	0.46 (0.05, 4.29)	0.5032	NA
Fins	99th percentile longevity	Weighted median	38	-0.0168464	0.504078	0.98 (0.37, 2.64)	0.97334	NA
Fins	99th percentile longevity	Simple mode	38	-0.0885026	0.976193	0.92 (0.14, 6.20)	0.928251	NA
Fins	99th percentile longevity	Weighted mode	38	-0.0557769	0.783522	0.95 (0.20, 4.39)	0.943632	NA
Fins	99th percentile longevity	Inverse variance weighted	38	0.196357	0.361317	1.22 (0.60, 2.47)	0.586821	0.691363
TG:HDL-C	99th percentile longevity	MR Egger	210	-0.234653	0.115059	0.79 (0.63, 0.99)	0.0426731	NA
TG:HDL-C	99th percentile longevity	Weighted median	210	-0.265698	0.103264	0.77 (0.63, 0.94)	0.0100822	NA
TG:HDL-C	99th percentile longevity	Simple mode	210	-0.314986	0.245864	0.73 (0.45, 1.18)	0.201565	NA
TG:HDL-C	99th percentile longevity	Weighted mode	210	-0.234627	0.124753	0.79 (0.62, 1.01)	0.0613984	NA
TG:HDL-C	99th percentile longevity	Inverse variance weighted	210	-0.231914	0.0690308	0.79 (0.69, 0.91)	0.000780616	0.00217215
mvIR_NGWAMA	99th percentile longevity	MR Egger	338	-0.302492	0.178025	0.74 (0.52, 1.05)	0.090216	NA
mvIR_NGWAMA	99th percentile longevity	Weighted median	338	-0.365078	0.156362	0.69 (0.51, 0.94)	0.0195523	NA
mvIR_NGWAMA	99th percentile longevity	Simple mode	338	-0.359636	0.380553	0.70 (0.33, 1.47)	0.345318	NA
mvIR_NGWAMA	99th percentile longevity	Weighted mode	338	-0.318171	0.185802	0.73 (0.51, 1.05)	0.0877397	NA
mvIR_NGWAMA	99th percentile longevity	Inverse variance weighted	338	-0.403667	0.102528	0.67 (0.55, 0.82)	8.24623e-05	0.000316655
mvIR_MTAG	99th percentile longevity	MR Egger	193	-0.227269	0.246561	0.80 (0.49, 1.29)	0.357819	NA
mvIR_MTAG	99th percentile longevity	Weighted median	193	-0.306052	0.177364	0.74 (0.52, 1.04)	0.0844276	NA
mvIR_MTAG	99th percentile longevity	Simple mode	193	-0.0707904	0.378793	0.93 (0.44, 1.96)	0.851949	NA
mvIR_MTAG	99th percentile longevity	Weighted mode	193	-0.17287	0.224399	0.84 (0.54, 1.31)	0.442028	NA
mvIR_MTAG	99th percentile longevity	Inverse variance weighted	193	-0.308843	0.124288	0.73 (0.58, 0.94)	0.0129588	0.0289312
The F-statistics were 22, 46, 52, 204, 115, and 102 for the HOMA-IR, ISI, Fins, TG:HDL-C, mvIR_NGWAMA, and mvIR_MTAG, respectively.
Abbreviations: CHD, coronary heart disease; CI, confidence interval; CKD, chronic kidney disease; FDR, false discovery rate; Fins, fasting insulin; GDM, gestational diabetes mellitus; HOMA-IR, homeostasis model assessment of insulin resistance; IR, insulin resistance; ISI, insulin sensitivity index; MARD, mild age-related diabetes; MOD, mild obesity-related diabetes; MR, Mendelian randomization; …

## Sheet: ST7
Supplementary Table 7. UVMR estimates for the causal associations between IR and seven common cancers
Exposure	Outcome	Method	No. of SNPs	β	SE	OR (95% CI)	P value	FDR-adjusted P value
HOMA-IR	Thyroid cancer	MR Egger	13	-0.615044	2.20165	0.54 (0.01, 40.46)	0.785155	NA
HOMA-IR	Thyroid cancer	Weighted median	13	-0.553122	0.590436	0.58 (0.18, 1.83)	0.348861	NA
HOMA-IR	Thyroid cancer	Simple mode	13	0.0310082	1.14444	1.03 (0.11, 9.72)	0.97883	NA
HOMA-IR	Thyroid cancer	Weighted mode	13	-0.260396	0.929092	0.77 (0.12, 4.76)	0.784044	NA
HOMA-IR	Thyroid cancer	Inverse variance weighted	13	-0.373802	0.596524	0.69 (0.21, 2.22)	0.530899	0.6619
ISI*	Thyroid cancer	MR Egger	8	-0.117395	0.771349	0.89 (0.20, 4.03)	0.884023	NA
ISI*	Thyroid cancer	Weighted median	8	-0.0473562	0.29277	0.95 (0.54, 1.69)	0.871501	NA
ISI*	Thyroid cancer	Simple mode	8	-0.223588	0.480971	0.80 (0.31, 2.05)	0.65614	NA
ISI*	Thyroid cancer	Weighted mode	8	-0.176754	0.407813	0.84 (0.38, 1.86)	0.677752	NA
ISI*	Thyroid cancer	Inverse variance weighted	8	-0.209976	0.238284	0.81 (0.51, 1.29)	0.378209	0.522418
Fins	Thyroid cancer	MR Egger	37	-0.274658	1.16723	0.76 (0.08, 7.49)	0.815342	NA
Fins	Thyroid cancer	Weighted median	37	-0.399462	0.480619	0.67 (0.26, 1.72)	0.405894	NA
Fins	Thyroid cancer	Simple mode	37	-0.714832	0.941972	0.49 (0.08, 3.10)	0.452872	NA
Fins	Thyroid cancer	Weighted mode	37	-0.558834	0.736524	0.57 (0.14, 2.42)	0.452944	NA
Fins	Thyroid cancer	Inverse variance weighted	37	-0.271714	0.366769	0.76 (0.37, 1.56)	0.458795	0.600476
TG:HDL-C	Thyroid cancer	MR Egger	209	-0.04624	0.0871381	0.95 (0.80, 1.13)	0.596228	NA
TG:HDL-C	Thyroid cancer	Weighted median	209	0.107498	0.0776243	1.11 (0.96, 1.30)	0.166097	NA
TG:HDL-C	Thyroid cancer	Simple mode	209	0.0140869	0.153079	1.01 (0.75, 1.37)	0.926768	NA
TG:HDL-C	Thyroid cancer	Weighted mode	209	0.0525794	0.0743113	1.05 (0.91, 1.22)	0.480013	NA
TG:HDL-C	Thyroid cancer	Inverse variance weighted	209	0.118454	0.0556081	1.13 (1.01, 1.26)	0.0331584	0.0663167
mvIR_NGWAMA	Thyroid cancer	MR Egger	333	0.0724207	0.135018	1.08 (0.83, 1.40)	0.592058	NA
mvIR_NGWAMA	Thyroid cancer	Weighted median	333	0.182048	0.129264	1.20 (0.93, 1.55)	0.15903	NA
mvIR_NGWAMA	Thyroid cancer	Simple mode	333	-0.109016	0.282756	0.90 (0.52, 1.56)	0.700079	NA
mvIR_NGWAMA	Thyroid cancer	Weighted mode	333	0.0553984	0.123768	1.06 (0.83, 1.35)	0.654735	NA
mvIR_NGWAMA	Thyroid cancer	Inverse variance weighted	333	0.185653	0.0809395	1.20 (1.03, 1.41)	0.021806	0.0465196
mvIR_MTAG	Thyroid cancer	MR Egger	194	-0.00146329	0.205086	1.00 (0.67, 1.49)	0.994315	NA
mvIR_MTAG	Thyroid cancer	Weighted median	194	0.0061253	0.146874	1.01 (0.75, 1.34)	0.966734	NA
mvIR_MTAG	Thyroid cancer	Simple mode	194	-0.119358	0.318111	0.89 (0.48, 1.66)	0.707918	NA
mvIR_MTAG	Thyroid cancer	Weighted mode	194	-0.119358	0.175779	0.89 (0.63, 1.25)	0.497937	NA
mvIR_MTAG	Thyroid cancer	Inverse variance weighted	194	0.0931771	0.103254	1.10 (0.90, 1.34)	0.366843	0.514116
HOMA-IR	Lung cancer	MR Egger	13	0.647508	0.818866	1.91 (0.38, 9.51)	0.445812	NA
HOMA-IR	Lung cancer	Weighted median	13	0.363679	0.331242	1.44 (0.75, 2.75)	0.272237	NA
HOMA-IR	Lung cancer	Simple mode	13	0.515768	0.540141	1.67 (0.58, 4.83)	0.35848	NA
HOMA-IR	Lung cancer	Weighted mode	13	0.467414	0.5039	1.60 (0.59, 4.28)	0.371901	NA
HOMA-IR	Lung cancer	Inverse variance weighted	13	0.124135	0.246587	1.13 (0.70, 1.84)	0.614674	0.715257
ISI*	Lung cancer	MR Egger	7	0.435733	0.618942	1.55 (0.46, 5.20)	0.51286	NA
ISI*	Lung cancer	Weighted median	7	0.251308	0.2137	1.29 (0.85, 1.95)	0.2396	NA
ISI*	Lung cancer	Simple mode	7	-0.0623349	0.327828	0.94 (0.49, 1.79)	0.855465	NA
ISI*	Lung cancer	Weighted mode	7	0.19599	0.256907	1.22 (0.74, 2.01)	0.474447	NA
ISI*	Lung cancer	Inverse variance weighted	7	0.22424	0.187415	1.25 (0.87, 1.81)	0.231507	0.355595
Fins	Lung cancer	MR Egger	36	0.237154	0.73826	1.27 (0.30, 5.39)	0.75	NA
Fins	Lung cancer	Weighted median	36	0.279302	0.318166	1.32 (0.71, 2.47)	0.380025	NA
Fins	Lung cancer	Simple mode	36	0.290673	0.625518	1.34 (0.39, 4.56)	0.645031	NA
Fins	Lung cancer	Weighted mode	36	0.311752	0.444973	1.37 (0.57, 3.27)	0.488179	NA
Fins	Lung cancer	Inverse variance weighted	36	0.216754	0.24011	1.24 (0.78, 1.99)	0.366668	0.514116
TG:HDL-C	Lung cancer	MR Egger	196	-0.0311523	0.0699026	0.97 (0.85, 1.11)	0.656345	NA
TG:HDL-C	Lung cancer	Weighted median	196	0.0198265	0.0611635	1.02 (0.90, 1.15)	0.74582	NA
TG:HDL-C	Lung cancer	Simple mode	196	0.142907	0.139778	1.15 (0.88, 1.52)	0.307868	NA
TG:HDL-C	Lung cancer	Weighted mode	196	0.0585741	0.0619344	1.06 (0.94, 1.20)	0.345449	NA
TG:HDL-C	Lung cancer	Inverse variance weighted	196	-0.0157882	0.0424724	0.98 (0.91, 1.07)	0.710096	0.7973
mvIR_NGWAMA	Lung cancer	MR Egger	319	-0.0658854	0.106131	0.94 (0.76, 1.15)	0.535182	NA
mvIR_NGWAMA	Lung cancer	Weighted median	319	0.117848	0.0913138	1.13 (0.94, 1.35)	0.196849	NA
mvIR_NGWAMA	Lung cancer	Simple mode	319	0.378645	0.238953	1.46 (0.91, 2.33)	0.114051	NA
mvIR_NGWAMA	Lung cancer	Weighted mode	319	0.145674	0.102235	1.16 (0.95, 1.41)	0.15517	NA
mvIR_NGWAMA	Lung cancer	Inverse variance weighted	319	0.00396879	0.0615857	1.00 (0.89, 1.13)	0.948617	0.973981
mvIR_MTAG	Lung cancer	MR Egger	184	-0.0367052	0.152038	0.96 (0.72, 1.30)	0.809501	NA
mvIR_MTAG	Lung cancer	Weighted median	184	0.0387901	0.101336	1.04 (0.85, 1.27)	0.701877	NA
mvIR_MTAG	Lung cancer	Simple mode	184	0.294394	0.214618	1.34 (0.88, 2.04)	0.171831	NA
mvIR_MTAG	Lung cancer	Weighted mode	184	0.0902216	0.129097	1.09 (0.85, 1.41)	0.485524	NA
mvIR_MTAG	Lung cancer	Inverse variance weighted	184	-0.0717941	0.0763888	0.93 (0.80, 1.08)	0.347294	0.501357
HOMA-IR	Breast cancer	MR Egger	13	0.0712493	0.635864	1.07 (0.31, 3.73)	0.912801	NA
HOMA-IR	Breast cancer	Weighted median	13	-0.175578	0.210993	0.84 (0.55, 1.27)	0.405325	NA
HOMA-IR	Breast cancer	Simple mode	13	-0.262624	0.358565	0.77 (0.38, 1.55)	0.477968	NA
HOMA-IR	Breast cancer	Weighted mode	13	-0.247614	0.306329	0.78 (0.43, 1.42)	0.434634	NA
HOMA-IR	Breast cancer	Inverse variance weighted	13	-0.0125367	0.171673	0.99 (0.71, 1.38)	0.941785	0.973981
ISI*	Breast cancer	MR Egger	8	0.426772	0.244562	1.53 (0.95, 2.47)	0.131589	NA
ISI*	Breast cancer	Weighted median	8	-0.0444301	0.110579	0.96 (0.77, 1.19)	0.687834	NA
ISI*	Breast cancer	Simple mode	8	-0.154469	0.185867	0.86 (0.60, 1.23)	0.43336	NA
ISI*	Breast cancer	Weighted mode	8	-0.0603076	0.166497	0.94 (0.68, 1.30)	0.727881	NA
ISI*	Breast cancer	Inverse variance weighted	8	-0.00577641	0.082813	0.99 (0.85, 1.17)	0.944391	0.973981
Fins	Breast cancer	MR Egger	37	-0.493454	0.503537	0.61 (0.23, 1.64)	0.333823	NA
Fins	Breast cancer	Weighted median	37	-0.174781	0.191957	0.84 (0.58, 1.22)	0.362547	NA
Fins	Breast cancer	Simple mode	37	-0.324419	0.378936	0.72 (0.34, 1.52)	0.397587	NA
Fins	Breast cancer	Weighted mode	37	-0.309544	0.296461	0.73 (0.41, 1.31)	0.303385	NA
Fins	Breast cancer	Inverse variance weighted	37	-0.0327474	0.160358	0.97 (0.71, 1.33)	0.838185	0.909218
TG:HDL-C	Breast cancer	MR Egger	209	-0.013247	0.0391901	0.99 (0.91, 1.07)	0.735692	NA
TG:HDL-C	Breast cancer	Weighted median	209	-0.0187448	0.0307729	0.98 (0.92, 1.04)	0.542437	NA
TG:HDL-C	Breast cancer	Simple mode	209	-0.0262083	0.0599906	0.97 (0.87, 1.10)	0.662656	NA
TG:HDL-C	Breast cancer	Weighted mode	209	-0.00698766	0.0278115	0.99 (0.94, 1.05)	0.801868	NA
TG:HDL-C	Breast cancer	Inverse variance weighted	209	-0.0200031	0.0246563	0.98 (0.93, 1.03)	0.417207	0.560165
mvIR_NGWAMA	Breast cancer	MR Egger	333	-0.00858157	0.0706742	0.99 (0.86, 1.14)	0.903429	NA
mvIR_NGWAMA	Breast cancer	Weighted median	333	-0.0439809	0.0516779	0.96 (0.86, 1.06)	0.394737	NA
mvIR_NGWAMA	Breast cancer	Simple mode	333	-0.109523	0.110778	0.90 (0.72, 1.11)	0.323545	NA
mvIR_NGWAMA	Breast cancer	Weighted mode	333	-0.0321324	0.0503482	0.97 (0.88, 1.07)	0.523781	NA
mvIR_NGWAMA	Breast cancer	Inverse variance weighted	333	-0.0378316	0.0423017	0.96 (0.89, 1.05)	0.371146	0.516377
mvIR_MTAG	Breast cancer	MR Egger	194	-0.115227	0.100193	0.89 (0.73, 1.08)	0.251555	NA
mvIR_MTAG	Breast cancer	Weighted median	194	-0.0845862	0.0561028	0.92 (0.82, 1.03)	0.131631	NA
mvIR_MTAG	Breast cancer	Simple mode	194	-0.0854338	0.117219	0.92 (0.73, 1.16)	0.466983	NA
mvIR_MTAG	Breast cancer	Weighted mode	194	-0.102097	0.0668137	0.90 (0.79, 1.03)	0.128129	NA
mvIR_MTAG	Breast cancer	Inverse variance weighted	194	-0.016584	0.0505729	0.98 (0.89, 1.09)	0.742969	0.815144
HOMA-IR	Hepatocellular carcinoma	MR Egger	13	3.50921	3.23025	33.42 (0.06, 18779.12)	0.300553	NA
HOMA-IR	Hepatocellular carcinoma	Weighted median	13	-1.14154	1.26956	0.32 (0.03, 3.85)	0.368567	NA
HOMA-IR	Hepatocellular carcinoma	Simple mode	13	-0.333737	2.17641	0.72 (0.01, 51.01)	0.880676	NA
HOMA-IR	Hepatocellular carcinoma	Weighted mode	13	-0.890478	1.92912	0.41 (0.01, 18.00)	0.652625	NA
HOMA-IR	Hepatocellular carcinoma	Inverse variance weighted	13	-1.09274	0.902892	0.34 (0.06, 1.97)	0.226177	0.35021
ISI*	Hepatocellular carcinoma	MR Egger	8	2.56111	1.5382	12.95 (0.64, 264.01)	0.146966	NA
ISI*	Hepatocellular carcinoma	Weighted median	8	0.53014	0.704628	1.70 (0.43, 6.76)	0.45183	NA
ISI*	Hepatocellular carcinoma	Simple mode	8	0.195651	1.05298	1.22 (0.15, 9.58)	0.857866	NA
ISI*	Hepatocellular carcinoma	Weighted mode	8	0.221684	0.977605	1.25 (0.18, 8.48)	0.827088	NA
ISI*	Hepatocellular carcinoma	Inverse variance weighted	8	0.683705	0.515521	1.98 (0.72, 5.44)	0.18476	0.295616
Fins	Hepatocellular carcinoma	MR Egger	37	-1.59348	2.66824	0.20 (0.00, 37.95)	0.554215	NA
Fins	Hepatocellular carcinoma	Weighted median	37	1.72612	1.17918	5.62 (0.56, 56.67)	0.143239	NA
Fins	Hepatocellular carcinoma	Simple mode	37	2.73053	2.50236	15.34 (0.11, 2069.68)	0.282442	NA
Fins	Hepatocellular carcinoma	Weighted mode	37	2.80106	2.5934	16.46 (0.10, 2654.81)	0.287294	NA
Fins	Hepatocellular carcinoma	Inverse variance weighted	37	1.72076	0.856615	5.59 (1.04, 29.96)	0.0445594	0.084707
TG:HDL-C	Hepatocellular carcinoma	MR Egger	209	-0.593473	0.250545	0.55 (0.34, 0.90)	0.0187695	NA
TG:HDL-C	Hepatocellular carcinoma	Weighted median	209	0.182729	0.197319	1.20 (0.82, 1.77)	0.354416	NA
TG:HDL-C	Hepatocellular carcinoma	Simple mode	209	0.159387	0.468303	1.17 (0.47, 2.94)	0.733936	NA
TG:HDL-C	Hepatocellular carcinoma	Weighted mode	209	0.159387	0.187048	1.17 (0.81, 1.69)	0.395129	NA
TG:HDL-C	Hepatocellular carcinoma	Inverse variance weighted	209	-0.102604	0.160438	0.90 (0.66, 1.24)	0.522482	0.658906
mvIR_NGWAMA	Hepatocellular carcinoma	MR Egger	333	-0.929268	0.368286	0.39 (0.19, 0.81)	0.0120964	NA
mvIR_NGWAMA	Hepatocellular carcinoma	Weighted median	333	0.525917	0.342422	1.69 (0.86, 3.31)	0.124569	NA
mvIR_NGWAMA	Hepatocellular carcinoma	Simple mode	333	2.03512	0.799794	7.65 (1.60, 36.70)	0.0113939	NA
mvIR_NGWAMA	Hepatocellular carcinoma	Weighted mode	333	0.485041	0.365437	1.62 (0.79, 3.32)	0.185325	NA
mvIR_NGWAMA	Hepatocellular carcinoma	Inverse variance weighted	333	0.275262	0.226816	1.32 (0.84, 2.05)	0.224904	0.35021
mvIR_MTAG	Hepatocellular carcinoma	MR Egger	194	-0.879856	0.575132	0.41 (0.13, 1.28)	0.127704	NA
mvIR_MTAG	Hepatocellular carcinoma	Weighted median	194	0.49632	0.381045	1.64 (0.78, 3.47)	0.192738	NA
mvIR_MTAG	Hepatocellular carcinoma	Simple mode	194	0.870725	0.883255	2.39 (0.42, 13.49)	0.325459	NA
mvIR_MTAG	Hepatocellular carcinoma	Weighted mode	194	0.955044	0.537248	2.60 (0.91, 7.45)	0.0770344	NA
mvIR_MTAG	Hepatocellular carcinoma	Inverse variance weighted	194	-0.00468623	0.292236	1.00 (0.56, 1.76)	0.987206	0.992374
HOMA-IR	Pancreatic cancer	MR Egger	13	-1.68813	1.27764	0.18 (0.02, 2.26)	0.213229	NA
HOMA-IR	Pancreatic cancer	Weighted median	13	0.0464288	0.500813	1.05 (0.39, 2.80)	0.926136	NA
HOMA-IR	Pancreatic cancer	Simple mode	13	-0.0375467	0.882867	0.96 (0.17, 5.44)	0.966777	NA
HOMA-IR	Pancreatic cancer	Weighted mode	13	0.0479553	0.764773	1.05 (0.23, 4.70)	0.951034	NA
HOMA-IR	Pancreatic cancer	Inverse variance weighted	13	0.264676	0.361213	1.30 (0.64, 2.64)	0.463716	0.601578
ISI*	Pancreatic cancer	MR Egger	8	0.466022	0.624015	1.59 (0.47, 5.41)	0.483404	NA
ISI*	Pancreatic cancer	Weighted median	8	0.111733	0.271324	1.12 (0.66, 1.90)	0.68048	NA
ISI*	Pancreatic cancer	Simple mode	8	0.0797308	0.372839	1.08 (0.52, 2.25)	0.836761	NA
ISI*	Pancreatic cancer	Weighted mode	8	0.0897783	0.351103	1.09 (0.55, 2.18)	0.805531	NA
ISI*	Pancreatic cancer	Inverse variance weighted	8	0.209415	0.207259	1.23 (0.82, 1.85)	0.312302	0.454258
Fins	Pancreatic cancer	MR Egger	37	1.61694	1.08657	5.04 (0.60, 42.38)	0.145678	NA
Fins	Pancreatic cancer	Weighted median	37	0.290383	0.481084	1.34 (0.52, 3.43)	0.546109	NA
Fins	Pancreatic cancer	Simple mode	37	0.575436	0.940947	1.78 (0.28, 11.24)	0.544679	NA
Fins	Pancreatic cancer	Weighted mode	37	0.393567	0.805834	1.48 (0.31, 7.19)	0.62823	NA
Fins	Pancreatic cancer	Inverse variance weighted	37	0.594049	0.345787	1.81 (0.92, 3.57)	0.0858035	0.15114
TG:HDL-C	Pancreatic cancer	MR Egger	209	-0.0726736	0.0751305	0.93 (0.80, 1.08)	0.334524	NA
TG:HDL-C	Pancreatic cancer	Weighted median	209	0.0486326	0.0866822	1.05 (0.89, 1.24)	0.574767	NA
TG:HDL-C	Pancreatic cancer	Simple mode	209	-0.045666	0.169848	0.96 (0.68, 1.33)	0.788301	NA
TG:HDL-C	Pancreatic cancer	Weighted mode	209	0.0342791	0.0811336	1.03 (0.88, 1.21)	0.673095	NA
TG:HDL-C	Pancreatic cancer	Inverse variance weighted	209	0.00809994	0.0474843	1.01 (0.92, 1.11)	0.864553	0.927342
mvIR_NGWAMA	Pancreatic cancer	MR Egger	333	-0.143056	0.119134	0.87 (0.69, 1.09)	0.230689	NA
mvIR_NGWAMA	Pancreatic cancer	Weighted median	333	0.081083	0.126371	1.08 (0.85, 1.39)	0.521115	NA
mvIR_NGWAMA	Pancreatic cancer	Simple mode	333	0.532535	0.308217	1.70 (0.93, 3.12)	0.0849558	NA
mvIR_NGWAMA	Pancreatic cancer	Weighted mode	333	0.108629	0.140977	1.11 (0.85, 1.47)	0.441526	NA
mvIR_NGWAMA	Pancreatic cancer	Inverse variance weighted	333	0.115907	0.072056	1.12 (0.97, 1.29)	0.107711	0.184647
mvIR_MTAG	Pancreatic cancer	MR Egger	194	-0.34108	0.169442	0.71 (0.51, 0.99)	0.0455159	NA
mvIR_MTAG	Pancreatic cancer	Weighted median	194	-0.289304	0.142098	0.75 (0.57, 0.99)	0.0417555	NA
mvIR_MTAG	Pancreatic cancer	Simple mode	194	0.262494	0.320311	1.30 (0.69, 2.44)	0.413513	NA
mvIR_MTAG	Pancreatic cancer	Weighted mode	194	-0.290659	0.177748	0.75 (0.53, 1.06)	0.10363	NA
mvIR_MTAG	Pancreatic cancer	Inverse variance weighted	194	-0.0518491	0.0854685	0.95 (0.80, 1.12)	0.544086	0.66538
HOMA-IR	Ovarian cancer	MR Egger	9	-0.0118566	1.19365	0.99 (0.10, 10.25)	0.992352	NA
HOMA-IR	Ovarian cancer	Weighted median	9	0.406666	0.321606	1.50 (0.80, 2.82)	0.206056	NA
HOMA-IR	Ovarian cancer	Simple mode	9	0.393489	0.452159	1.48 (0.61, 3.60)	0.409518	NA
HOMA-IR	Ovarian cancer	Weighted mode	9	0.461639	0.391094	1.59 (0.74, 3.42)	0.271754	NA
HOMA-IR	Ovarian cancer	Inverse variance weighted	9	0.16727	0.292626	1.18 (0.67, 2.10)	0.567583	0.689399
ISI*	Ovarian cancer	MR Egger	5	0.0502688	0.530308	1.05 (0.37, 2.97)	0.930457	NA
ISI*	Ovarian cancer	Weighted median	5	0.0676197	0.152862	1.07 (0.79, 1.44)	0.65823	NA
ISI*	Ovarian cancer	Simple mode	5	0.0904235	0.214848	1.09 (0.72, 1.67)	0.695477	NA
ISI*	Ovarian cancer	Weighted mode	5	0.0525649	0.189953	1.05 (0.73, 1.53)	0.795702	NA
ISI*	Ovarian cancer	Inverse variance weighted	5	0.083082	0.128512	1.09 (0.84, 1.40)	0.51796	0.658906
Fins	Ovarian cancer	MR Egger	31	0.237526	0.490053	1.27 (0.49, 3.31)	0.631534	NA
Fins	Ovarian cancer	Weighted median	31	0.254501	0.235485	1.29 (0.81, 2.05)	0.279806	NA
Fins	Ovarian cancer	Simple mode	31	0.561759	0.416903	1.75 (0.77, 3.97)	0.187922	NA
Fins	Ovarian cancer	Weighted mode	31	0.380518	0.335453	1.46 (0.76, 2.82)	0.265634	NA
Fins	Ovarian cancer	Inverse variance weighted	31	0.14376	0.167021	1.15 (0.83, 1.60)	0.389387	0.534017
TG:HDL-C	Ovarian cancer	MR Egger	133	0.0688259	0.0547318	1.07 (0.96, 1.19)	0.210805	NA
TG:HDL-C	Ovarian cancer	Weighted median	133	0.0965471	0.0503026	1.10 (1.00, 1.22)	0.054943	NA
TG:HDL-C	Ovarian cancer	Simple mode	133	0.0733897	0.102121	1.08 (0.88, 1.31)	0.473625	NA
TG:HDL-C	Ovarian cancer	Weighted mode	133	0.0541506	0.0512065	1.06 (0.95, 1.17)	0.292217	NA
TG:HDL-C	Ovarian cancer	Inverse variance weighted	133	0.0605723	0.0335064	1.06 (0.99, 1.13)	0.0706401	0.127952
mvIR_NGWAMA	Ovarian cancer	MR Egger	222	0.165479	0.0999095	1.18 (0.97, 1.44)	0.0990886	NA
mvIR_NGWAMA	Ovarian cancer	Weighted median	222	0.162623	0.0769484	1.18 (1.01, 1.37)	0.0345657	NA
mvIR_NGWAMA	Ovarian cancer	Simple mode	222	0.0835743	0.158408	1.09 (0.80, 1.48)	0.598313	NA
mvIR_NGWAMA	Ovarian cancer	Weighted mode	222	0.135512	0.0761036	1.15 (0.99, 1.33)	0.0763481	NA
mvIR_NGWAMA	Ovarian cancer	Inverse variance weighted	222	0.0488422	0.0593852	1.05 (0.93, 1.18)	0.410813	0.555465
mvIR_MTAG	Ovarian cancer	MR Egger	127	0.0925592	0.144641	1.10 (0.83, 1.46)	0.523392	NA
mvIR_MTAG	Ovarian cancer	Weighted median	127	0.0699312	0.0853102	1.07 (0.91, 1.27)	0.412371	NA
mvIR_MTAG	Ovarian cancer	Simple mode	127	-0.0459433	0.178927	0.96 (0.67, 1.36)	0.797775	NA
mvIR_MTAG	Ovarian cancer	Weighted mode	127	0.0481538	0.104468	1.05 (0.86, 1.29)	0.645635	NA
mvIR_MTAG	Ovarian cancer	Inverse variance weighted	127	0.0265603	0.0712573	1.03 (0.89, 1.18)	0.709343	0.7973
HOMA-IR	Endometrial cancer	MR Egger	13	0.592259	0.704158	1.81 (0.45, 7.19)	0.418208	NA
HOMA-IR	Endometrial cancer	Weighted median	13	0.327161	0.289607	1.39 (0.79, 2.45)	0.258614	NA
HOMA-IR	Endometrial cancer	Simple mode	13	0.0750698	0.513217	1.08 (0.39, 2.95)	0.886134	NA
HOMA-IR	Endometrial cancer	Weighted mode	13	0.149803	0.469492	1.16 (0.46, 2.92)	0.755156	NA
HOMA-IR	Endometrial cancer	Inverse variance weighted	13	0.374211	0.215711	1.45 (0.95, 2.22)	0.0827796	0.147164
ISI*	Endometrial cancer	MR Egger	8	-0.29441	0.614517	0.74 (0.22, 2.48)	0.648834	NA
ISI*	Endometrial cancer	Weighted median	8	-0.131217	0.192048	0.88 (0.60, 1.28)	0.49445	NA
ISI*	Endometrial cancer	Simple mode	8	-0.223942	0.254004	0.80 (0.49, 1.32)	0.407219	NA
ISI*	Endometrial cancer	Weighted mode	8	-0.163067	0.210555	0.85 (0.56, 1.28)	0.464007	NA
ISI*	Endometrial cancer	Inverse variance weighted	8	0.0366923	0.197103	1.04 (0.70, 1.53)	0.852321	0.919357
Fins	Endometrial cancer	MR Egger	38	1.33757	0.697136	3.81 (0.97, 14.94)	0.0629834	NA
Fins	Endometrial cancer	Weighted median	38	0.797184	0.277028	2.22 (1.29, 3.82)	0.00400679	NA
Fins	Endometrial cancer	Simple mode	38	1.01086	0.499888	2.75 (1.03, 7.32)	0.0504323	NA
Fins	Endometrial cancer	Weighted mode	38	0.832513	0.434745	2.30 (0.98, 5.39)	0.0632546	NA
Fins	Endometrial cancer	Inverse variance weighted	38	0.592177	0.232626	1.81 (1.15, 2.85)	0.0109084	0.0255415
TG:HDL-C	Endometrial cancer	MR Egger	219	-0.117497	0.0670189	0.89 (0.78, 1.01)	0.08098	NA
TG:HDL-C	Endometrial cancer	Weighted median	219	-0.0783441	0.0505245	0.92 (0.84, 1.02)	0.120994	NA
TG:HDL-C	Endometrial cancer	Simple mode	219	-0.00480223	0.108007	1.00 (0.81, 1.23)	0.964577	NA
TG:HDL-C	Endometrial cancer	Weighted mode	219	-0.0892944	0.0496733	0.91 (0.83, 1.01)	0.0736188	NA
TG:HDL-C	Endometrial cancer	Inverse variance weighted	219	0.00269024	0.0406908	1.00 (0.93, 1.09)	0.947287	0.973981
mvIR_NGWAMA	Endometrial cancer	MR Egger	343	-0.103862	0.0994818	0.90 (0.74, 1.10)	0.29721	NA
mvIR_NGWAMA	Endometrial cancer	Weighted median	343	-0.0377238	0.074931	0.96 (0.83, 1.12)	0.61465	NA
mvIR_NGWAMA	Endometrial cancer	Simple mode	343	-0.08446	0.183155	0.92 (0.64, 1.32)	0.644992	NA
mvIR_NGWAMA	Endometrial cancer	Weighted mode	343	-0.110975	0.0844354	0.89 (0.76, 1.06)	0.189619	NA
mvIR_NGWAMA	Endometrial cancer	Inverse variance weighted	343	0.0314387	0.0578686	1.03 (0.92, 1.16)	0.586939	0.691363
mvIR_MTAG	Endometrial cancer	MR Egger	195	-0.194097	0.140337	0.82 (0.63, 1.08)	0.16824	NA
mvIR_MTAG	Endometrial cancer	Weighted median	195	-0.0235182	0.0878	0.98 (0.82, 1.16)	0.788806	NA
mvIR_MTAG	Endometrial cancer	Simple mode	195	0.0260201	0.209191	1.03 (0.68, 1.55)	0.90114	NA
mvIR_MTAG	Endometrial cancer	Weighted mode	195	-0.12496	0.102001	0.88 (0.72, 1.08)	0.222027	NA
mvIR_MTAG	Endometrial cancer	Inverse variance weighted	195	0.0242072	0.0715766	1.02 (0.89, 1.18)	0.735213	0.81127
Abbreviations: CI, confidence interval; FDR, false discovery rate; Fins, fasting insulin; HOMA-IR, homeostasis model assessment of insulin resistance; IR, insulin resistance; ISI, insulin sensitivity index; MR, Mendelian randomization; MTAG, multi-trait analysis of genome-wide association study; NA, not applicable; NGWAMA, N-weighted genome-wide association meta-analysis; OR, odds ratio; SE, stan…

## Sheet: ST8
Supplementary Table 8. Directional pleiotropy test and heterogeneity test for the causal associations of IR with cardiometabolic health and longevity outcomes
Exposure	Outcome	Heterogeneity test			Directional pleiotropy test
		Q statistic	Q df	P value	Egger intercept	SE	P value
HOMA-IR	Type 1 diabetes	17.5891	12	0.128749	0.0252028	0.0324018	0.45308
ISI*	Type 1 diabetes	3.93887	7	0.786791	-0.0440411	0.0267036	0.15019
Fins	Type 1 diabetes	65.3143	37	0.00277633	-0.0158638	0.017442	0.369129
TG:HDL-C	Type 1 diabetes	293.817	204	3.82715e-05	0.0103395	0.00336739	0.00242959
mvIR_NGWAMA	Type 1 diabetes	431.89	322	4.02661e-05	0.00806883	0.00271612	0.00319513
mvIR_MTAG	Type 1 diabetes	501.247	190	6.757e-30	0.00826727	0.00578058	0.154316
HOMA-IR	Type 2 diabetes	31.7977	11	0.000821853	0.041824	0.0323825	0.225562
ISI*	Type 2 diabetes	30.2096	7	8.69116e-05	-0.0123912	0.0579369	0.837728
Fins	Type 2 diabetes	680.061	37	2.98758e-119	-0.0732244	0.0404188	0.0783908
TG:HDL-C	Type 2 diabetes	728.76	212	6.72982e-58	0.0186158	0.00396534	4.80436e-06
mvIR_NGWAMA	Type 2 diabetes	987.447	340	2.12979e-64	0.0150951	0.00298242	6.84068e-07
mvIR_MTAG	Type 2 diabetes	651.057	195	1.78764e-50	0.0224299	0.00470468	3.65259e-06
HOMA-IR	SAID	4.48748	10	0.922689	-0.00969067	0.12242	0.938638
ISI*	SAID	2.4872	6	0.869898	-0.143075	0.126169	0.308221
Fins	SAID	24.5516	31	0.787406	-0.0675272	0.0515209	0.199913
TG:HDL-C	SAID	184.85	182	0.427197	0.000684065	0.0109263	0.950148
mvIR_NGWAMA	SAID	352.072	310	0.0499603	0.0133413	0.00925317	0.15037
mvIR_MTAG	SAID	197.854	178	0.146737	0.00194272	0.0136201	0.88674
HOMA-IR	SIDD	17.8396	10	0.0577297	-0.115388	0.116482	0.34776
ISI*	SIDD	7.16923	6	0.30548	0.109191	0.0954677	0.304514
Fins	SIDD	101.899	31	1.75e-09	-0.0523084	0.0664917	0.437634
TG:HDL-C	SIDD	178.122	183	0.587982	0.0297402	0.00763384	0.000137353
mvIR_NGWAMA	SIDD	339.819	310	0.117465	0.0271994	0.00625054	1.84e-05
mvIR_MTAG	SIDD	173.194	179	0.608307	0.0370884	0.00908266	6.7e-05
HOMA-IR	SIRD	20.0389	10	0.0288873	-0.135104	0.122715	0.299487
ISI*	SIRD	10.4735	6	0.106075	-0.0723993	0.125064	0.587756
Fins	SIRD	36.2427	31	0.237221	-0.016561	0.0399963	0.681773
TG:HDL-C	SIRD	162.858	182	0.842688	0.0198653	0.00765953	0.0102766
mvIR_NGWAMA	SIRD	320.801	309	0.310115	0.0221615	0.00615308	0.000368424
mvIR_MTAG	SIRD	160.739	178	0.818743	0.0263212	0.00909423	0.00427858
HOMA-IR	MOD	6.04793	10	0.81122	-0.040224	0.0819991	0.635488
ISI*	MOD	7.34879	6	0.289792	-0.062495	0.098054	0.551932
Fins	MOD	92.494	31	4.92e-08	-0.0273915	0.0600979	0.651829
TG:HDL-C	MOD	199.265	183	0.194661	0.00961494	0.00752698	0.203089
mvIR_NGWAMA	MOD	317.963	310	0.365484	0.0131155	0.00584523	0.0255537
mvIR_MTAG	MOD	179.948	179	0.466025	0.0245588	0.00858031	0.00471137
HOMA-IR	MARD	12.4352	10	0.256985	-0.0720539	0.0744807	0.358611
ISI*	MARD	5.59322	6	0.470262	-0.0857726	0.0684138	0.265366
Fins	MARD	136.218	31	3.79e-15	-0.0345341	0.058834	0.561612
TG:HDL-C	MARD	237.493	183	0.00413857	0.0186463	0.00653019	0.0047978
mvIR_NGWAMA	MARD	389.17	310	0.00149169	0.0179568	0.00517248	0.000591086
mvIR_MTAG	MARD	189.913	179	0.27408	0.0233251	0.00691856	0.000917395
HOMA-IR	GDM	68.6991	12	5.61e-10	0.031564	0.0377661	0.421064
ISI*	GDM	12.0674	7	0.0983654	-0.0118614	0.0220654	0.610226
Fins	GDM	266.714	36	5.21e-37	-0.028531	0.0208086	0.179067
TG:HDL-C	GDM	427.059	208	3.06e-17	0.00984128	0.00232814	3.55e-05
mvIR_NGWAMA	GDM	660.36	332	5.79e-24	0.0101176	0.00187787	1.36e-07
mvIR_MTAG	GDM	427.876	193	7.58e-20	0.011797	0.0030333	0.000138544
HOMA-IR	Metabolic syndrome	29.3455	11	0.00200582	0.00153349	0.00241804	0.540193
ISI*	Metabolic syndrome	98.3556	4	2.20227e-20	-0.0113664	0.0122053	0.420407
Fins	Metabolic syndrome	333.168	23	8.57593e-57	-0.0016177	0.00408881	0.69618
TG:HDL-C	Metabolic syndrome	728.696	71	8.71693e-110	0.00256138	0.00122023	0.0394172
mvIR_NGWAMA	Metabolic syndrome	1193.51	108	2.28987e-182	0.00219305	0.00112157	0.0531513
mvIR_MTAG	Metabolic syndrome	1017.45	96	7.90635e-154	0.00152167	0.00118953	0.203935
HOMA-IR	NAFLD	13.6256	12	0.325252	-0.111304	0.0602005	0.0915084
ISI*	NAFLD	5.92317	7	0.548749	0.0454514	0.0613658	0.486859
Fins	NAFLD	48.0124	37	0.106139	-0.0023164	0.0345254	0.946879
TG:HDL-C	NAFLD	334.788	204	2.0773e-08	0.00517759	0.00842317	0.539452
mvIR_NGWAMA	NAFLD	489.041	322	5.1925e-09	0.0075914	0.00670257	0.258224
mvIR_MTAG	NAFLD	307.283	190	1.47995e-07	0.00336921	0.0104269	0.746958
HOMA-IR	CKD	8.97561	12	0.705012	-0.0164555	0.0296763	0.590332
ISI*	CKD	6.29308	7	0.505975	0.0281829	0.0302569	0.387564
Fins	CKD	33.0049	37	0.656881	0.00658788	0.0147696	0.658238
TG:HDL-C	CKD	246.097	204	0.0233865	0.00391781	0.00355585	0.271857
mvIR_NGWAMA	CKD	374.566	322	0.0230612	0.00753409	0.00286739	0.00901426
mvIR_MTAG	CKD	202.541	190	0.253432	0.00671493	0.00415119	0.107418
HOMA-IR	PCOS	12.1668	12	0.432376	-0.0162415	0.00995514	0.131064
ISI*	PCOS	6.24805	7	0.511102	0.0202649	0.010145	0.092743
Fins	PCOS	76.4489	36	9.76238e-05	0.00417165	0.00725316	0.568869
TG:HDL-C	PCOS	306.567	208	1.01964e-05	0.00420889	0.00128162	0.00120147
mvIR_NGWAMA	PCOS	456.314	332	6.74111e-06	0.00223054	0.00103378	0.0316741
mvIR_MTAG	PCOS	294.675	193	3.32045e-06	0.00304351	0.0016557	0.0675777
HOMA-IR	Hypertension	14.8064	12	0.252197	-0.0113756	0.0138816	0.429917
ISI*	Hypertension	20.155	7	0.00524443	0.00683464	0.0229548	0.77594
Fins	Hypertension	86.8125	37	6.99e-06	-0.0060889	0.0094791	0.524716
TG:HDL-C	Hypertension	598.387	204	2.17e-40	0.00868451	0.00222999	0.000133559
mvIR_NGWAMA	Hypertension	866.267	322	1.9e-51	0.00608706	0.00180117	0.000815722
mvIR_MTAG	Hypertension	485.025	190	1.04e-27	0.0107276	0.00257305	4.65e-05
HOMA-IR	CHD	6.81708	12	0.869461	0.00391191	0.00989365	0.700111
ISI*	CHD	10.3636	7	0.168887	0.0167675	0.0156016	0.323804
Fins	CHD	88.3531	36	2.71e-06	0.0140616	0.00895804	0.125478
TG:HDL-C	CHD	625.311	208	2.42e-43	0.00694945	0.00226684	0.00246103
mvIR_NGWAMA	CHD	864.396	336	3.1e-48	0.00421287	0.00172458	0.0150883
mvIR_MTAG	CHD	512.788	193	7.88e-31	0.00565255	0.00262216	0.0323526
HOMA-IR	Myocardial infarction	7.53855	12	0.820073	0.00412821	0.0112111	0.719693
ISI*	Myocardial infarction	16.0716	7	0.0244699	0.0154034	0.0228336	0.525061
Fins	Myocardial infarction	64.4644	36	0.00246608	0.0136016	0.00849343	0.118272
TG:HDL-C	Myocardial infarction	539.911	206	9.4e-32	0.00652368	0.00235884	0.00620002
mvIR_NGWAMA	Myocardial infarction	782.609	331	1.37e-38	0.0037703	0.00185065	0.0424193
mvIR_MTAG	Myocardial infarction	445.384	193	5.34e-22	0.00378807	0.00272793	0.166556
HOMA-IR	Stroke	14.8802	12	0.248056	0.01167	0.00869976	0.206822
ISI*	Stroke	4.22743	7	0.753241	0.00116006	0.0108167	0.918089
Fins	Stroke	79.0577	37	6.97605e-05	-0.00143607	0.0073739	0.846683
TG:HDL-C	Stroke	393.899	203	2.41301e-14	0.00457768	0.00159055	0.00443175
mvIR_NGWAMA	Stroke	580.65	333	1.09391e-15	0.0039807	0.00121575	0.00117098
mvIR_MTAG	Stroke	354.533	191	6.45317e-12	0.00578267	0.00183914	0.00193277
HOMA-IR	Heart failure	8.61082	11	0.657766	-0.00941197	0.00912628	0.326696
ISI*	Heart failure	7.61891	7	0.367394	-0.00712835	0.0108229	0.534571
Fins	Heart failure	50.0985	34	0.0369934	0.0058876	0.00597414	0.331542
TG:HDL-C	Heart failure	452.14	181	3.51871e-25	0.00290776	0.00187841	0.123381
mvIR_NGWAMA	Heart failure	679.791	302	3.81329e-31	0.00286329	0.00138649	0.0397669
mvIR_MTAG	Heart failure	441.684	194	2.34506e-21	0.00153268	0.00201235	0.447208
HOMA-IR	Atrial fibrillation	14.5544	11	0.203819	0.0085846	0.00869729	0.346901
ISI*	Atrial fibrillation	17.4299	7	0.0148251	0.0158045	0.013259	0.278271
Fins	Atrial fibrillation	119.215	34	2.13425e-11	0.0010994	0.00782803	0.889163
TG:HDL-C	Atrial fibrillation	551.006	185	4.83127e-38	0.00258296	0.00172048	0.13499
mvIR_NGWAMA	Atrial fibrillation	807.184	303	1.87177e-47	0.000284044	0.00127265	0.823537
mvIR_MTAG	Atrial fibrillation	605.844	195	1.16817e-43	-0.00025134	0.00198826	0.899537
HOMA-IR	PAD	15.5638	12	0.212044	-0.00379903	0.0274388	0.892383
ISI*	PAD	2.52884	7	0.92491	0.00701606	0.0237013	0.777193
Fins	PAD	74.1931	37	0.000273757	0.000326491	0.0165227	0.984344
TG:HDL-C	PAD	339.457	204	7.99324e-09	0.00485037	0.00324274	0.136268
mvIR_NGWAMA	PAD	455.961	322	1.23434e-06	0.00273201	0.00248584	0.272579
mvIR_MTAG	PAD	291.395	190	3.08197e-06	0.00186782	0.00390029	0.632569
HOMA-IR	Resilience	26.9836	11	0.00462156	-0.0107379	0.00545454	0.077321
ISI*	Resilience	10.1567	7	0.179864	0.00152653	0.00545952	0.789167
Fins	Resilience	112.276	34	2.68342e-10	0.000166228	0.00373585	0.964778
TG:HDL-C	Resilience	492.631	202	2.69076e-26	-0.00275615	0.000709658	0.000139522
mvIR_NGWAMA	Resilience	747.349	339	8.3737e-33	-0.0026607	0.000537892	1.19305e-06
mvIR_MTAG	Resilience	440.989	194	2.85675e-21	-0.00246472	0.000816336	0.00287653
HOMA-IR	Healthspan	8.06652	12	0.779911	0.00330487	0.00574616	0.576769
ISI*	Healthspan	14.1949	7	0.0478213	-0.00641586	0.00913083	0.508599
Fins	Healthspan	254.729	34	1.27145e-35	0.00917997	0.0081378	0.267427
TG:HDL-C	Healthspan	530.645	203	3.93367e-31	-0.0054692	0.00104103	3.77177e-07
mvIR_NGWAMA	Healthspan	694.316	344	7.2411e-26	-0.00344146	0.000745968	5.60234e-06
mvIR_MTAG	Healthspan	433.763	195	3.3012e-20	-0.00341688	0.00118822	0.00448278
HOMA-IR	Parental lifespan	6.78777	12	0.871314	-0.000479783	0.00456563	0.918199
ISI*	Parental lifespan	14.3368	7	0.0455052	-0.00920111	0.0067427	0.221338
Fins	Parental lifespan	87.4143	34	1.36866e-06	-0.00298353	0.0038521	0.444138
TG:HDL-C	Parental lifespan	657.703	197	5.79286e-51	-0.00174685	0.00101234	0.086004
mvIR_NGWAMA	Parental lifespan	907.812	336	4.03287e-54	-0.00190155	0.000713947	0.0081084
mvIR_MTAG	Parental lifespan	562.514	191	2.77885e-38	-0.00170405	0.00111893	0.129439
HOMA-IR	90th percentile longevity	12.2861	12	0.422987	-0.0164545	0.0231028	0.491154
ISI*	90th percentile longevity	6.08659	7	0.529675	-0.00282369	0.026468	0.918518
Fins	90th percentile longevity	56.346	37	0.0216945	-0.00652421	0.0146229	0.658152
TG:HDL-C	90th percentile longevity	369.101	210	7.36839e-11	-0.00356392	0.00365831	0.331084
mvIR_NGWAMA	90th percentile longevity	581.592	340	6.28339e-15	-0.000300184	0.00292887	0.918427
mvIR_MTAG	90th percentile longevity	335.358	193	9.32374e-10	-0.000294742	0.00438243	0.946448
HOMA-IR	99th percentile longevity	20.7152	12	0.0547097	0.0592882	0.0457269	0.221318
ISI*	99th percentile longevity	4.79426	7	0.685054	0.0414522	0.042039	0.362191
Fins	99th percentile longevity	32.0642	37	0.699509	0.0166766	0.0186156	0.37629
TG:HDL-C	99th percentile longevity	282.466	209	0.000530745	0.000151459	0.0050834	0.976259
mvIR_NGWAMA	99th percentile longevity	452.676	337	2.52179e-05	-0.00284683	0.00409348	0.487251
mvIR_MTAG	99th percentile longevity	278.048	192	4.81948e-05	-0.00240363	0.00626973	0.701871
*, reversed-coded. Abbreviations: CHD, coronary heart disease; CKD, chronic kidney disease; Fins, fasting insulin; GDM, gestational diabetes mellitus; HOMA-IR, homeostasis model assessment of insulin resistance; IR, insulin resistance; ISI, insulin sensitivity index; MARD, mild age-related diabetes; MOD, mild obesity-related diabetes; MTAG, multi-trait analysis of genome-wide association study; N…

## Sheet: ST9
Supplementary Table 9. MVMR estimates for the causal associations of mvIR with cardiometabolic health and longevity outcomes with adjustment for each adiposity or sarcopenia-related trait
Outcome	Adjusted for	Method	β (95% CI)	OR (95% CI)	P value	F-statistic
Type 1 diabetes	BF%	MV-IVW	/	1.47 (1.27, 1.69)	2.06658e-07	85
		MVMR-Median	/	1.58 (1.31, 1.91)	1.64842e-06
		MVMR-Egger	/	1.46 (1.26, 1.68)	3.22843e-07
		MVMR-Lasso	/	1.42 (1.25, 1.60)	2.08876e-08
Type 1 diabetes	BMI	MV-IVW	/	1.37 (1.16, 1.60)	0.000140235	58
		MVMR-Median	/	1.47 (1.19, 1.82)	0.000427345
		MVMR-Egger	/	1.36 (1.11, 1.68)	0.00366572
		MVMR-Lasso	/	1.36 (1.18, 1.57)	1.55025e-05
Type 1 diabetes	WHR	MV-IVW	/	1.43 (1.18, 1.74)	0.000259654	21
		MVMR-Median	/	1.49 (1.19, 1.85)	0.000379848
		MVMR-Egger	/	1.15 (0.86, 1.55)	0.337274
		MVMR-Lasso	/	1.42 (1.22, 1.65)	3.67e-06
Type 1 diabetes	GS	MV-IVW	/	1.42 (1.23, 1.65)	2.98887e-06	104
		MVMR-Median	/	1.56 (1.30, 1.87)	1.61802e-06
		MVMR-Egger	/	1.42 (1.23, 1.65)	3.07993e-06
		MVMR-Lasso	/	1.37 (1.22, 1.55)	2.01983e-07
Type 1 diabetes	ALM	MV-IVW	/	1.29 (1.10, 1.50)	0.00124265	60
		MVMR-Median	/	1.42 (1.16, 1.75)	0.000707574
		MVMR-Egger	/	1.16 (0.97, 1.40)	0.106358
		MVMR-Lasso	/	1.30 (1.14, 1.48)	9.65335e-05
Type 1 diabetes	WBLM	MV-IVW	/	1.25 (1.07, 1.47)	0.00548441	64
		MVMR-Median	/	1.33 (1.09, 1.62)	0.00493216
		MVMR-Egger	/	1.15 (0.95, 1.39)	0.164557
		MVMR-Lasso	/	1.23 (1.08, 1.40)	0.00134613
Type 2 diabetes	BF%	MV-IVW	/	2.02 (1.74, 2.33)	5.14806e-21	84
		MVMR-Median	/	2.02 (1.69, 2.42)	1.75762e-14
		MVMR-Egger	/	1.16 (0.94, 1.43)	0.167364
		MVMR-Lasso	/	1.96 (1.74, 2.20)	9.75806e-30
Type 2 diabetes	BMI	MV-IVW	/	2.05 (1.76, 2.39)	2.86433e-20	56
		MVMR-Median	/	2.02 (1.64, 2.48)	2.26826e-11
		MVMR-Egger	/	1.60 (1.32, 1.95)	1.85215e-06
		MVMR-Lasso	/	2.13 (1.86, 2.45)	4.36275e-27
Type 2 diabetes	WHR	MV-IVW	/	1.77 (1.47, 2.12)	9.05242e-10	21
		MVMR-Median	/	1.79 (1.45, 2.21)	7.84871e-08
		MVMR-Egger	/	1.15 (0.88, 1.51)	0.308163
		MVMR-Lasso	/	1.67 (1.45, 1.93)	7.32452e-13
Type 2 diabetes	GS	MV-IVW	/	2.00 (1.72, 2.33)	1.59558e-19	103
		MVMR-Median	/	2.11 (1.76, 2.52)	2.97904e-16
		MVMR-Egger	/	2.00 (1.72, 2.32)	2.80428e-19
		MVMR-Lasso	/	2.16 (1.93, 2.43)	4.11716e-39
Type 2 diabetes	ALM	MV-IVW	/	1.86 (1.61, 2.16)	1.64027e-16	59
		MVMR-Median	/	1.98 (1.63, 2.40)	8.51015e-12
		MVMR-Egger	/	1.63 (1.37, 1.95)	5.60243e-08
		MVMR-Lasso	/	1.77 (1.55, 2.02)	6.04199e-17
Type 2 diabetes	WBLM	MV-IVW	/	1.94 (1.67, 2.25)	2.46934e-18	63
		MVMR-Median	/	2.06 (1.69, 2.51)	8.59123e-13
		MVMR-Egger	/	1.56 (1.30, 1.87)	1.83329e-06
		MVMR-Lasso	/	1.94 (1.71, 2.19)	2.92408e-26
SIDD	BF%	MV-IVW	/	2.35 (1.70, 3.26)	2.98434e-07	79
		MVMR-Median	/	3.67 (2.26, 5.98)	1.61157e-07
		MVMR-Egger	/	1.24 (0.75, 2.04)	0.406152
		MVMR-Lasso	/	2.54 (1.85, 3.49)	9.37474e-09
SIDD	BMI	MV-IVW	/	2.19 (1.50, 3.20)	4.44137e-05	57
		MVMR-Median	/	2.91 (1.67, 5.08)	0.000171883
		MVMR-Egger	/	1.47 (0.90, 2.39)	0.120226
		MVMR-Lasso	/	2.34 (1.64, 3.36)	3.48486e-06
SIDD	WHR	MV-IVW	/	1.78 (1.21, 2.61)	0.00311516	22
		MVMR-Median	/	2.24 (1.28, 3.91)	0.00461566
		MVMR-Egger	/	0.75 (0.42, 1.34)	0.331672
		MVMR-Lasso	/	1.78 (1.24, 2.58)	0.00200961
SIDD	GS	MV-IVW	/	2.15 (1.57, 2.95)	2.07729e-06	98
		MVMR-Median	/	2.53 (1.57, 4.09)	0.000143541
		MVMR-Egger	/	2.15 (1.57, 2.95)	2.17494e-06
		MVMR-Lasso	/	2.24 (1.64, 3.04)	3.21377e-07
SIDD	ALM	MV-IVW	/	1.92 (1.33, 2.78)	0.000498286	57
		MVMR-Median	/	2.61 (1.53, 4.45)	0.000403011
		MVMR-Egger	/	1.69 (1.08, 2.64)	0.022708
		MVMR-Lasso	/	2.12 (1.49, 3.01)	2.74955e-05
SIDD	WBLM	MV-IVW	/	2.12 (1.49, 3.01)	2.65531e-05	60
		MVMR-Median	/	2.59 (1.55, 4.35)	0.000299453
		MVMR-Egger	/	1.38 (0.89, 2.13)	0.152356
		MVMR-Lasso	/	2.14 (1.53, 2.99)	8.91185e-06
SIRD	BF%	MV-IVW	/	2.16 (1.55, 3.00)	5.79565e-06	80
		MVMR-Median	/	1.96 (1.23, 3.14)	0.00499425
		MVMR-Egger	/	1.14 (0.69, 1.89)	0.616184
		MVMR-Lasso	/	2.27 (1.66, 3.12)	3.22169e-07
SIRD	BMI	MV-IVW	/	2.02 (1.40, 2.92)	0.000182878	57
		MVMR-Median	/	1.87 (1.10, 3.17)	0.0203169
		MVMR-Egger	/	1.47 (0.92, 2.37)	0.110763
		MVMR-Lasso	/	2.20 (1.55, 3.14)	1.18765e-05
SIRD	WHR	MV-IVW	/	1.59 (1.11, 2.29)	0.0123138	22
		MVMR-Median	/	1.63 (0.97, 2.74)	0.0642909
		MVMR-Egger	/	0.87 (0.50, 1.53)	0.637456
		MVMR-Lasso	/	1.76 (1.22, 2.53)	0.00253459
SIRD	GS	MV-IVW	/	2.12 (1.56, 2.89)	1.66914e-06	98
		MVMR-Median	/	2.11 (1.33, 3.32)	0.00137559
		MVMR-Egger	/	2.13 (1.56, 2.89)	1.64667e-06
		MVMR-Lasso	/	2.27 (1.66, 3.09)	2.07827e-07
SIRD	ALM	MV-IVW	/	2.20 (1.54, 3.16)	1.82868e-05	57
		MVMR-Median	/	2.17 (1.29, 3.63)	0.00337398
		MVMR-Egger	/	1.62 (1.05, 2.52)	0.030191
		MVMR-Lasso	/	2.41 (1.71, 3.41)	5.77848e-07
SIRD	WBLM	MV-IVW	/	2.33 (1.65, 3.28)	1.28436e-06	60
		MVMR-Median	/	2.27 (1.38, 3.73)	0.00123166
		MVMR-Egger	/	1.56 (1.02, 2.40)	0.0401485
		MVMR-Lasso	/	2.48 (1.78, 3.47)	1.00519e-07
MOD	BF%	MV-IVW	/	2.28 (1.69, 3.08)	8.51328e-08	79
		MVMR-Median	/	2.17 (1.39, 3.40)	0.000679614
		MVMR-Egger	/	1.45 (0.91, 2.30)	0.117005
		MVMR-Lasso	/	2.13 (1.58, 2.86)	6.63695e-07
MOD	BMI	MV-IVW	/	2.04 (1.43, 2.90)	7.63858e-05	57
		MVMR-Median	/	1.86 (1.12, 3.09)	0.0162242
		MVMR-Egger	/	1.56 (0.99, 2.47)	0.056567
		MVMR-Lasso	/	2.11 (1.48, 3.00)	3.28225e-05
MOD	WHR	MV-IVW	/	1.73 (1.24, 2.42)	0.00118549	22
		MVMR-Median	/	1.69 (1.02, 2.80)	0.0419829
		MVMR-Egger	/	1.23 (0.72, 2.09)	0.454091
		MVMR-Lasso	/	1.73 (1.23, 2.44)	0.00156705
MOD	GS	MV-IVW	/	1.98 (1.48, 2.65)	4.66179e-06	97
		MVMR-Median	/	1.68 (1.08, 2.60)	0.0204861
		MVMR-Egger	/	1.98 (1.47, 2.65)	5.10433e-06
		MVMR-Lasso	/	1.98 (1.48, 2.65)	4.66179e-06
MOD	ALM	MV-IVW	/	2.49 (1.75, 3.53)	4.02607e-07	57
		MVMR-Median	/	2.35 (1.42, 3.89)	0.000846458
		MVMR-Egger	/	1.80 (1.17, 2.76)	0.00697264
		MVMR-Lasso	/	2.77 (1.98, 3.89)	3.75062e-09
MOD	WBLM	MV-IVW	/	2.35 (1.69, 3.27)	4.35791e-07	60
		MVMR-Median	/	2.08 (1.29, 3.37)	0.00285497
		MVMR-Egger	/	1.70 (1.12, 2.57)	0.0126063
		MVMR-Lasso	/	2.55 (1.84, 3.54)	2.16172e-08
MARD	BF%	MV-IVW	/	1.78 (1.36, 2.33)	2.60332e-05	79
		MVMR-Median	/	2.08 (1.42, 3.05)	0.000161918
		MVMR-Egger	/	0.92 (0.61, 1.39)	0.694813
		MVMR-Lasso	/	2.29 (1.77, 2.95)	2.22086e-10
MARD	BMI	MV-IVW	/	1.55 (1.15, 2.08)	0.00368136	57
		MVMR-Median	/	1.86 (1.21, 2.85)	0.00445
		MVMR-Egger	/	1.22 (0.84, 1.79)	0.299598
		MVMR-Lasso	/	1.78 (1.34, 2.37)	6.61344e-05
MARD	WHR	MV-IVW	/	1.28 (0.94, 1.74)	0.116788	22
		MVMR-Median	/	1.61 (1.04, 2.49)	0.0318758
		MVMR-Egger	/	0.78 (0.48, 1.26)	0.310758
		MVMR-Lasso	/	1.57 (1.17, 2.11)	0.00274259
MARD	GS	MV-IVW	/	1.69 (1.30, 2.19)	8.47783e-05	97
		MVMR-Median	/	1.92 (1.32, 2.79)	0.000661173
		MVMR-Egger	/	1.69 (1.30, 2.19)	7.96003e-05
		MVMR-Lasso	/	2.02 (1.57, 2.60)	5.2235e-08
MARD	ALM	MV-IVW	/	1.56 (1.17, 2.08)	0.00271183	57
		MVMR-Median	/	1.92 (1.26, 2.92)	0.00221762
		MVMR-Egger	/	1.52 (1.13, 2.03)	0.00506351
		MVMR-Lasso	/	2.07 (1.56, 2.75)	5.49166e-07
MARD	WBLM	MV-IVW	/	1.70 (1.29, 2.23)	0.000149576	60
		MVMR-Median	/	2.25 (1.49, 3.41)	0.000119323
		MVMR-Egger	/	1.50 (1.06, 2.11)	0.0223414
		MVMR-Lasso	/	2.31 (1.76, 3.04)	2.16223e-09
GDM	BF%	MV-IVW	/	1.40 (1.27, 1.54)	6.2179e-12	84
		MVMR-Median	/	1.39 (1.23, 1.57)	1.27051e-07
		MVMR-Egger	/	1.12 (0.98, 1.30)	0.102473
		MVMR-Lasso	/	1.36 (1.26, 1.46)	8.14208e-16
GDM	BMI	MV-IVW	/	1.29 (1.15, 1.45)	2.37214e-05	60
		MVMR-Median	/	1.35 (1.18, 1.55)	1.46941e-05
		MVMR-Egger	/	1.19 (1.02, 1.38)	0.0261674
		MVMR-Lasso	/	1.27 (1.16, 1.39)	1.53137e-07
GDM	WHR	MV-IVW	/	1.31 (1.15, 1.49)	3.32396e-05	22
		MVMR-Median	/	1.43 (1.23, 1.65)	2.88145e-06
		MVMR-Egger	/	0.94 (0.78, 1.13)	0.534626
		MVMR-Lasso	/	1.29 (1.18, 1.42)	3.4189e-08
GDM	GS	MV-IVW	/	1.39 (1.26, 1.52)	3.14303e-12	14
		MVMR-Median	/	1.46 (1.30, 1.65)	2.94198e-10
		MVMR-Egger	/	1.38 (1.26, 1.51)	4.0029e-12
		MVMR-Lasso	/	1.40 (1.30, 1.50)	7.31272e-19
GDM	ALM	MV-IVW	/	1.31 (1.19, 1.45)	8.2095e-08	59
		MVMR-Median	/	1.41 (1.24, 1.60)	1.65709e-07
		MVMR-Egger	/	1.16 (1.03, 1.31)	0.012173
		MVMR-Lasso	/	1.32 (1.21, 1.43)	5.58613e-11
GDM	WBLM	MV-IVW	/	1.35 (1.21, 1.50)	3.38775e-08	63
		MVMR-Median	/	1.43 (1.25, 1.62)	5.60771e-08
		MVMR-Egger	/	1.17 (1.03, 1.33)	0.018397
		MVMR-Lasso	/	1.34 (1.24, 1.45)	2.08895e-13
Metabolic syndrome	BF%	MV-IVW	/	1.73 (1.65, 1.82)	3.6173e-111	40
		MVMR-Median	/	1.76 (1.68, 1.84)	1.056e-141
		MVMR-Egger	/	1.61 (1.47, 1.75)	2.57542e-26
		MVMR-Lasso	/	1.76 (1.72, 1.81)	0
Metabolic syndrome	BMI	MV-IVW	/	1.62 (1.58, 1.66)	0	19
		MVMR-Median	/	1.63 (1.56, 1.69)	1.4585e-136
		MVMR-Egger	/	1.64 (1.59, 1.70)	3.8333e-195
		MVMR-Lasso	/	1.63 (1.60, 1.66)	0
Metabolic syndrome	WHR	MV-IVW	/	1.78 (1.67, 1.88)	3.54414e-81	15
		MVMR-Median	/	1.71 (1.64, 1.78)	5.1059e-138
		MVMR-Egger	/	1.58 (1.40, 1.78)	2.83425e-13
		MVMR-Lasso	/	1.67 (1.63, 1.71)	0
Metabolic syndrome	GS	MV-IVW	/	1.70 (1.63, 1.78)	5.9793e-135	60
		MVMR-Median	/	1.64 (1.58, 1.70)	2.4437e-154
		MVMR-Egger	/	1.62 (1.50, 1.76)	7.28332e-34
		MVMR-Lasso	/	1.66 (1.62, 1.70)	0
Metabolic syndrome	ALM	MV-IVW	/	1.65 (1.57, 1.74)	1.36799e-88	28
		MVMR-Median	/	1.59 (1.51, 1.66)	5.63489e-81
		MVMR-Egger	/	1.63 (1.52, 1.74)	2.75492e-48
		MVMR-Lasso	/	1.63 (1.58, 1.68)	2.9299e-215
Metabolic syndrome	WBLM	MV-IVW	/	1.74 (1.63, 1.86)	5.62541e-65	31
		MVMR-Median	/	1.72 (1.65, 1.80)	9.9452e-133
		MVMR-Egger	/	1.61 (1.48, 1.75)	3.16237e-27
		MVMR-Lasso	/	1.72 (1.67, 1.77)	4.2e-270
NAFLD	BF%	MV-IVW	/	1.72 (1.25, 2.36)	0.000797308	85
		MVMR-Median	/	1.90 (1.24, 2.90)	0.00310796
		MVMR-Egger	/	1.39 (0.87, 2.24)	0.168517
		MVMR-Lasso	/	1.80 (1.35, 2.40)	5.9832e-05
NAFLD	BMI	MV-IVW	/	2.13 (1.48, 3.05)	3.96531e-05	58
		MVMR-Median	/	2.08 (1.30, 3.32)	0.00227705
		MVMR-Egger	/	1.83 (1.15, 2.92)	0.0109086
		MVMR-Lasso	/	2.21 (1.58, 3.07)	2.87727e-06
NAFLD	WHR	MV-IVW	/	1.92 (1.29, 2.86)	0.00138957	21
		MVMR-Median	/	2.28 (1.41, 3.69)	0.000761293
		MVMR-Egger	/	1.65 (0.90, 3.02)	0.107282
		MVMR-Lasso	/	2.28 (1.63, 3.21)	1.93862e-06
NAFLD	GS	MV-IVW	/	1.67 (1.22, 2.29)	0.00136608	104
		MVMR-Median	/	2.12 (1.40, 3.21)	0.000397494
		MVMR-Egger	/	1.26 (0.79, 2.02)	0.334315
		MVMR-Lasso	/	1.95 (1.48, 2.58)	2.63911e-06
NAFLD	ALM	MV-IVW	/	1.97 (1.44, 2.69)	1.90754e-05	59
		MVMR-Median	/	2.29 (1.44, 3.63)	0.000456696
		MVMR-Egger	/	1.50 (1.04, 2.18)	0.0310031
		MVMR-Lasso	/	2.39 (1.76, 3.23)	1.80756e-08
NAFLD	WBLM	MV-IVW	/	1.69 (1.22, 2.36)	0.00182176	63
		MVMR-Median	/	2.12 (1.36, 3.30)	0.000847144
		MVMR-Egger	/	1.30 (0.87, 1.96)	0.200509
		MVMR-Lasso	/	1.76 (1.30, 2.39)	0.000296384
CKD	BF%	MV-IVW	/	1.26 (1.09, 1.46)	0.00198111	85
		MVMR-Median	/	1.18 (0.97, 1.44)	0.100796
		MVMR-Egger	/	1.13 (0.91, 1.41)	0.282688
		MVMR-Lasso	/	1.20 (1.04, 1.37)	0.00964369
CKD	BMI	MV-IVW	/	1.23 (1.03, 1.45)	0.0183679	58
		MVMR-Median	/	1.16 (0.92, 1.47)	0.194738
		MVMR-Egger	/	1.11 (0.89, 1.38)	0.363073
		MVMR-Lasso	/	1.17 (1.00, 1.38)	0.0458361
CKD	WHR	MV-IVW	/	1.16 (0.98, 1.38)	0.0824893	21
		MVMR-Median	/	1.10 (0.87, 1.39)	0.441373
		MVMR-Egger	/	1.01 (0.78, 1.31)	0.920913
		MVMR-Lasso	/	1.19 (1.01, 1.40)	0.0399974
CKD	GS	MV-IVW	/	1.22 (1.06, 1.40)	0.00492517	104
		MVMR-Median	/	1.14 (0.94, 1.39)	0.181601
		MVMR-Egger	/	1.22 (1.06, 1.40)	0.00452527
		MVMR-Lasso	/	1.18 (1.04, 1.35)	0.0112903
CKD	ALM	MV-IVW	/	1.25 (1.08, 1.46)	0.00308216	59
		MVMR-Median	/	1.16 (0.93, 1.44)	0.19576
		MVMR-Egger	/	1.19 (1.00, 1.43)	0.0552594
		MVMR-Lasso	/	1.22 (1.05, 1.41)	0.00940709
CKD	WBLM	MV-IVW	/	1.22 (1.07, 1.41)	0.00441901	64
		MVMR-Median	/	1.12 (0.91, 1.39)	0.280008
		MVMR-Egger	/	1.16 (0.97, 1.38)	0.09732
		MVMR-Lasso	/	1.22 (1.06, 1.41)	0.00517465
PCOS	BF%	MV-IVW	/	1.12 (1.06, 1.18)	1.7981e-05	84
		MVMR-Median	/	1.11 (1.03, 1.20)	0.00479969
		MVMR-Egger	/	1.04 (0.96, 1.13)	0.317416
		MVMR-Lasso	/	1.12 (1.07, 1.18)	2.31777e-06
PCOS	BMI	MV-IVW	/	1.06 (1.00, 1.12)	0.0335422	58
		MVMR-Median	/	1.07 (0.98, 1.16)	0.111843
		MVMR-Egger	/	1.06 (0.99, 1.15)	0.0916217
		MVMR-Lasso	/	1.05 (1.00, 1.11)	0.0748782
PCOS	WHR	MV-IVW	/	1.08 (1.01, 1.15)	0.0196126	22
		MVMR-Median	/	1.06 (0.97, 1.15)	0.232397
		MVMR-Egger	/	1.00 (0.91, 1.10)	0.944807
		MVMR-Lasso	/	1.03 (0.97, 1.09)	0.35178
PCOS	GS	MV-IVW	/	1.10 (1.05, 1.16)	0.00012651	103
		MVMR-Median	/	1.07 (1.00, 1.15)	0.0481245
		MVMR-Egger	/	1.05 (0.97, 1.13)	0.226348
		MVMR-Lasso	/	1.09 (1.04, 1.15)	0.000209751
PCOS	ALM	MV-IVW	/	1.10 (1.04, 1.16)	0.00077006	59
		MVMR-Median	/	1.11 (1.02, 1.20)	0.0108976
		MVMR-Egger	/	1.08 (1.01, 1.15)	0.029345
		MVMR-Lasso	/	1.11 (1.05, 1.17)	9.91623e-05
PCOS	WBLM	MV-IVW	/	1.10 (1.04, 1.16)	0.000910432	63
		MVMR-Median	/	1.07 (0.99, 1.15)	0.104125
		MVMR-Egger	/	1.07 (1.00, 1.15)	0.0364213
		MVMR-Lasso	/	1.09 (1.03, 1.14)	0.00131869
Hypertension	BF%	MV-IVW	/	1.43 (1.32, 1.56)	1.22001e-16	85
		MVMR-Median	/	1.40 (1.27, 1.55)	5.08585e-11
		MVMR-Egger	/	1.19 (1.05, 1.35)	0.00624017
		MVMR-Lasso	/	1.42 (1.33, 1.52)	3.05564e-26
Hypertension	BMI	MV-IVW	/	1.37 (1.26, 1.50)	1.3073e-12	58
		MVMR-Median	/	1.27 (1.14, 1.41)	2.26855e-05
		MVMR-Egger	/	1.29 (1.15, 1.44)	1.11155e-05
		MVMR-Lasso	/	1.32 (1.23, 1.42)	1.40436e-13
Hypertension	WHR	MV-IVW	/	1.39 (1.24, 1.55)	4.80178e-09	21
		MVMR-Median	/	1.38 (1.24, 1.54)	1.0068e-08
		MVMR-Egger	/	1.13 (0.96, 1.33)	0.133768
		MVMR-Lasso	/	1.38 (1.28, 1.49)	4.31157e-18
Hypertension	GS	MV-IVW	/	1.37 (1.26, 1.49)	5.7869e-13	105
		MVMR-Median	/	1.39 (1.26, 1.53)	1.82652e-11
		MVMR-Egger	/	1.37 (1.26, 1.49)	7.45854e-13
		MVMR-Lasso	/	1.41 (1.33, 1.50)	2.94427e-28
Hypertension	ALM	MV-IVW	/	1.39 (1.27, 1.53)	7.16598e-12	60
		MVMR-Median	/	1.38 (1.24, 1.53)	3.64436e-09
		MVMR-Egger	/	1.30 (1.16, 1.46)	4.79946e-06
		MVMR-Lasso	/	1.41 (1.31, 1.51)	4.68742e-22
Hypertension	WBLM	MV-IVW	/	1.37 (1.26, 1.49)	7.86637e-13	64
		MVMR-Median	/	1.41 (1.28, 1.56)	3.28403e-11
		MVMR-Egger	/	1.36 (1.25, 1.49)	2.00959e-12
		MVMR-Lasso	/	1.42 (1.33, 1.52)	2.1118e-24
CHD	BF%	MV-IVW	/	1.49 (1.37, 1.61)	5.17836e-22	83
		MVMR-Median	/	1.53 (1.38, 1.70)	7.83411e-16
		MVMR-Egger	/	1.34 (1.18, 1.51)	2.40798e-06
		MVMR-Lasso	/	1.52 (1.43, 1.62)	3.43869e-38
CHD	BMI	MV-IVW	/	1.44 (1.32, 1.57)	8.8457e-17	57
		MVMR-Median	/	1.61 (1.43, 1.82)	3.10757e-15
		MVMR-Egger	/	1.39 (1.24, 1.55)	7.06407e-09
		MVMR-Lasso	/	1.55 (1.44, 1.66)	2.12649e-32
CHD	WHR	MV-IVW	/	1.46 (1.32, 1.63)	1.26057e-12	22
		MVMR-Median	/	1.66 (1.47, 1.88)	3.27491e-16
		MVMR-Egger	/	1.26 (1.07, 1.48)	0.00471472
		MVMR-Lasso	/	1.52 (1.40, 1.65)	4.04641e-24
CHD	GS	MV-IVW	/	1.46 (1.34, 1.59)	4.28804e-18	101
		MVMR-Median	/	1.60 (1.45, 1.76)	1.97969e-20
		MVMR-Egger	/	1.45 (1.34, 1.58)	7.47745e-18
		MVMR-Lasso	/	1.48 (1.39, 1.57)	1.49429e-35
CHD	ALM	MV-IVW	/	1.47 (1.36, 1.60)	8.5698e-20	58
		MVMR-Median	/	1.65 (1.47, 1.85)	6.05e-18
		MVMR-Egger	/	1.35 (1.22, 1.49)	3.73e-09
		MVMR-Lasso	/	1.58 (1.47, 1.70)	6.88e-35
CHD	WBLM	MV-IVW	/	1.47 (1.35, 1.60)	1.18379e-18	62
		MVMR-Median	/	1.66 (1.49, 1.85)	9.10781e-20
		MVMR-Egger	/	1.47 (1.35, 1.60)	1.64386e-18
		MVMR-Lasso	/	1.52 (1.42, 1.62)	2.08481e-34
Myocardial infarction	BF%	MV-IVW	/	1.46 (1.35, 1.59)	9.25991e-20	83
		MVMR-Median	/	1.57 (1.41, 1.75)	1.24633e-16
		MVMR-Egger	/	1.30 (1.15, 1.47)	2.35256e-05
		MVMR-Lasso	/	1.51 (1.41, 1.61)	4.05797e-33
Myocardial infarction	BMI	MV-IVW	/	1.44 (1.31, 1.58)	2.07106e-14	57
		MVMR-Median	/	1.55 (1.37, 1.75)	3.09823e-12
		MVMR-Egger	/	1.38 (1.22, 1.55)	1.3042e-07
		MVMR-Lasso	/	1.52 (1.41, 1.64)	3.49802e-28
Myocardial infarction	WHR	MV-IVW	/	1.42 (1.27, 1.60)	1.2863e-09	22
		MVMR-Median	/	1.58 (1.39, 1.80)	4.10213e-12
		MVMR-Egger	/	1.25 (1.05, 1.49)	0.012409
		MVMR-Lasso	/	1.53 (1.41, 1.66)	2.09688e-25
Myocardial infarction	GS	MV-IVW	/	1.42 (1.29, 1.55)	7.00809e-14	100
		MVMR-Median	/	1.53 (1.38, 1.70)	1.52243e-15
		MVMR-Egger	/	1.41 (1.29, 1.55)	1.19669e-13
		MVMR-Lasso	/	1.52 (1.43, 1.63)	1.07317e-36
Myocardial infarction	ALM	MV-IVW	/	1.42 (1.30, 1.55)	3.39765e-15	58
		MVMR-Median	/	1.56 (1.39, 1.75)	6.99165e-14
		MVMR-Egger	/	1.34 (1.21, 1.49)	3.63467e-08
		MVMR-Lasso	/	1.54 (1.43, 1.65)	1.44276e-30
Myocardial infarction	WBLM	MV-IVW	/	1.44 (1.31, 1.58)	3.69371e-15	62
		MVMR-Median	/	1.60 (1.43, 1.80)	4.44e-16
		MVMR-Egger	/	1.44 (1.31, 1.58)	4.54e-15
		MVMR-Lasso	/	1.52 (1.42, 1.63)	3.19e-31
Stroke	BF%	MV-IVW	/	1.14 (1.07, 1.21)	3.78466e-05	82
		MVMR-Median	/	1.13 (1.05, 1.22)	0.00186078
		MVMR-Egger	/	1.01 (0.92, 1.11)	0.781386
		MVMR-Lasso	/	1.15 (1.09, 1.22)	1.32779e-07
Stroke	BMI	MV-IVW	/	1.14 (1.07, 1.21)	8.834e-05	57
		MVMR-Median	/	1.13 (1.04, 1.23)	0.00442339
		MVMR-Egger	/	1.07 (0.99, 1.17)	0.100761
		MVMR-Lasso	/	1.13 (1.07, 1.19)	2.37157e-05
Stroke	WHR	MV-IVW	/	1.09 (1.01, 1.17)	0.0271046	21
		MVMR-Median	/	1.12 (1.02, 1.22)	0.0161751
		MVMR-Egger	/	0.96 (0.85, 1.07)	0.441167
		MVMR-Lasso	/	1.08 (1.02, 1.15)	0.00879528
Stroke	GS	MV-IVW	/	1.12 (1.06, 1.19)	0.000170454	98
		MVMR-Median	/	1.12 (1.04, 1.21)	0.00338152
		MVMR-Egger	/	1.12 (1.06, 1.19)	0.000197935
		MVMR-Lasso	/	1.16 (1.10, 1.22)	2.87061e-08
Stroke	ALM	MV-IVW	/	1.09 (1.02, 1.16)	0.00724074	57
		MVMR-Median	/	1.11 (1.02, 1.20)	0.0166241
		MVMR-Egger	/	1.06 (0.98, 1.14)	0.14992
		MVMR-Lasso	/	1.11 (1.05, 1.17)	0.000276631
Stroke	WBLM	MV-IVW	/	1.14 (1.07, 1.21)	7.63915e-05	61
		MVMR-Median	/	1.12 (1.03, 1.22)	0.00589118
		MVMR-Egger	/	1.13 (1.06, 1.21)	0.000121178
		MVMR-Lasso	/	1.18 (1.11, 1.25)	2.13856e-08
Heart failure	BF%	MV-IVW	/	1.19 (1.12, 1.27)	1.54945e-07	85
		MVMR-Median	/	1.23 (1.13, 1.32)	3.22423e-07
		MVMR-Egger	/	1.17 (1.07, 1.30)	0.00126128
		MVMR-Lasso	/	1.21 (1.15, 1.28)	1.27603e-12
Heart failure	BMI	MV-IVW	/	1.23 (1.14, 1.32)	2.5579e-08	59
		MVMR-Median	/	1.23 (1.13, 1.34)	3.60201e-06
		MVMR-Egger	/	1.25 (1.14, 1.37)	2.55437e-06
		MVMR-Lasso	/	1.23 (1.16, 1.31)	1.1526e-11
Heart failure	WHR	MV-IVW	/	1.24 (1.14, 1.36)	6.48378e-07	22
		MVMR-Median	/	1.26 (1.15, 1.37)	4.25782e-07
		MVMR-Egger	/	1.17 (1.03, 1.33)	0.019012
		MVMR-Lasso	/	1.27 (1.19, 1.35)	4.12012e-14
Heart failure	GS	MV-IVW	/	1.15 (1.08, 1.24)	5.99599e-05	102
		MVMR-Median	/	1.19 (1.10, 1.28)	7.41174e-06
		MVMR-Egger	/	1.15 (1.08, 1.24)	5.78165e-05
		MVMR-Lasso	/	1.22 (1.16, 1.28)	5.12127e-14
Heart failure	ALM	MV-IVW	/	1.19 (1.11, 1.27)	4.39471e-07	59
		MVMR-Median	/	1.23 (1.13, 1.34)	1.54768e-06
		MVMR-Egger	/	1.15 (1.06, 1.24)	0.000702461
		MVMR-Lasso	/	1.26 (1.19, 1.34)	9.29181e-15
Heart failure	WBLM	MV-IVW	/	1.17 (1.09, 1.25)	6.83523e-06	64
		MVMR-Median	/	1.23 (1.13, 1.33)	1.32236e-06
		MVMR-Egger	/	1.17 (1.09, 1.26)	5.81084e-06
		MVMR-Lasso	/	1.26 (1.19, 1.33)	4.89851e-15
PAD	BF%	MV-IVW	/	1.59 (1.41, 1.78)	4.9048e-15	85
		MVMR-Median	/	1.58 (1.35, 1.86)	1.79409e-08
		MVMR-Egger	/	1.42 (1.19, 1.68)	7.98474e-05
		MVMR-Lasso	/	1.62 (1.46, 1.80)	5.53351e-19
PAD	BMI	MV-IVW	/	1.52 (1.33, 1.74)	9.29807e-10	58
		MVMR-Median	/	1.59 (1.33, 1.90)	2.96429e-07
		MVMR-Egger	/	1.40 (1.18, 1.67)	0.000135782
		MVMR-Lasso	/	1.56 (1.38, 1.76)	3.07253e-12
PAD	WHR	MV-IVW	/	1.45 (1.25, 1.68)	8.62847e-07	21
		MVMR-Median	/	1.52 (1.27, 1.82)	5.29049e-06
		MVMR-Egger	/	1.30 (1.04, 1.62)	0.0233935
		MVMR-Lasso	/	1.55 (1.36, 1.76)	3.09455e-11
PAD	GS	MV-IVW	/	1.54 (1.37, 1.74)	3.04544e-12	105
		MVMR-Median	/	1.56 (1.33, 1.83)	3.30307e-08
		MVMR-Egger	/	1.46 (1.22, 1.75)	4.78551e-05
		MVMR-Lasso	/	1.56 (1.41, 1.74)	1.67253e-16
PAD	ALM	MV-IVW	/	1.58 (1.39, 1.80)	3.94075e-12	60
		MVMR-Median	/	1.58 (1.33, 1.88)	1.93e-07
		MVMR-Egger	/	1.51 (1.29, 1.76)	2.11e-07
		MVMR-Lasso	/	1.54 (1.37, 1.73)	8.81e-13
PAD	WBLM	MV-IVW	/	1.55 (1.37, 1.76)	2.20724e-12	64
		MVMR-Median	/	1.55 (1.32, 1.83)	1.89789e-07
		MVMR-Egger	/	1.48 (1.27, 1.72)	4.23473e-07
		MVMR-Lasso	/	1.60 (1.43, 1.79)	4.60332e-16
Resilience	BF%	MV-IVW	-0.103 (-0.130, -0.077)	/	1.1813e-14	83
		MVMR-Median	-0.098 (-0.130, -0.065)	/	2.53815e-09
		MVMR-Egger	-0.053 (-0.092, -0.013)	/	0.0092432
		MVMR-Lasso	-0.107 (-0.128, -0.085)	/	1.0978e-22
Resilience	BMI	MV-IVW	-0.148 (-0.190, -0.105)	/	7.19244e-12	57
		MVMR-Median	-0.171 (-0.230, -0.111)	/	1.57424e-08
		MVMR-Egger	-0.099 (-0.153, -0.045)	/	0.000318244
		MVMR-Lasso	-0.174 (-0.215, -0.134)	/	2.66359e-17
Resilience	WHR	MV-IVW	-0.087 (-0.122, -0.053)	/	5.00902e-07	22
		MVMR-Median	-0.079 (-0.116, -0.042)	/	2.87969e-05
		MVMR-Egger	-0.004 (-0.055, 0.048)	/	0.893815
		MVMR-Lasso	-0.092 (-0.118, -0.066)	/	8.40159e-12
Resilience	GS	MV-IVW	-0.089 (-0.116, -0.063)	/	4.35203e-11	98
		MVMR-Median	-0.095 (-0.126, -0.064)	/	1.2572e-09
		MVMR-Egger	-0.038 (-0.078, 0.001)	/	0.0592254
		MVMR-Lasso	-0.083 (-0.103, -0.063)	/	4.90062e-16
Resilience	ALM	MV-IVW	-0.083 (-0.111, -0.054)	/	9.67226e-09	57
		MVMR-Median	-0.079 (-0.113, -0.045)	/	6.50097e-06
		MVMR-Egger	-0.046 (-0.080, -0.013)	/	0.00672794
		MVMR-Lasso	-0.082 (-0.104, -0.059)	/	1.26156e-12
Resilience	WBLM	MV-IVW	-0.084 (-0.113, -0.056)	/	4.37782e-09	61
		MVMR-Median	-0.095 (-0.127, -0.062)	/	9.62582e-09
		MVMR-Egger	-0.050 (-0.085, -0.016)	/	0.0045344
		MVMR-Lasso	-0.070 (-0.092, -0.048)	/	5.16785e-10
Healthspan	BF%	MV-IVW	/	0.84 (0.81, 0.88)	4.07332e-17	83
		MVMR-Median	/	0.84 (0.80, 0.88)	2.35398e-11
		MVMR-Egger	/	0.91 (0.86, 0.97)	0.00277373
		MVMR-Lasso	/	0.83 (0.80, 0.86)	5.15852e-29
Healthspan	BMI	MV-IVW	/	0.86 (0.83, 0.90)	7.19244e-12	56
		MVMR-Median	/	0.84 (0.79, 0.89)	1.57424e-08
		MVMR-Egger	/	0.91 (0.86, 0.96)	0.000318244
		MVMR-Lasso	/	0.84 (0.81, 0.87)	2.66359e-17
Healthspan	WHR	MV-IVW	/	0.87 (0.83, 0.91)	7.64707e-09	21
		MVMR-Median	/	0.86 (0.81, 0.91)	1.97197e-07
		MVMR-Egger	/	0.96 (0.90, 1.03)	0.28466
		MVMR-Lasso	/	0.86 (0.83, 0.90)	2.31599e-13
Healthspan	GS	MV-IVW	/	0.86 (0.83, 0.89)	1.23312e-15	102
		MVMR-Median	/	0.83 (0.79, 0.87)	1.03377e-14
		MVMR-Egger	/	0.86 (0.83, 0.89)	1.78708e-15
		MVMR-Lasso	/	0.84 (0.82, 0.87)	1.06783e-28
Healthspan	ALM	MV-IVW	/	0.86 (0.82, 0.89)	4.97144e-15	58
		MVMR-Median	/	0.83 (0.79, 0.88)	3.59676e-11
		MVMR-Egger	/	0.89 (0.85, 0.93)	1.02734e-06
		MVMR-Lasso	/	0.84 (0.82, 0.87)	1.79162e-21
Healthspan	WBLM	MV-IVW	/	0.87 (0.84, 0.90)	3.08738e-12	62
		MVMR-Median	/	0.85 (0.80, 0.89)	3.66319e-10
		MVMR-Egger	/	0.91 (0.87, 0.96)	0.000157981
		MVMR-Lasso	/	0.87 (0.84, 0.89)	1.80987e-18
Parental lifespan	BF%	MV-IVW	-1.659 (-2.011, -1.307)	/	2.47735e-20	83
		MVMR-Median	-1.631 (-2.013, -1.249)	/	5.75657e-17
		MVMR-Egger	-1.173 (-1.700, -0.646)	/	1.26903e-05
		MVMR-Lasso	-1.515 (-1.767, -1.263)	/	4.29956e-32
Parental lifespan	BMI	MV-IVW	-0.145 (-0.183, -0.108)	/	2.35774e-14	58
		MVMR-Median	-0.118 (-0.159, -0.077)	/	1.42227e-08
		MVMR-Egger	-0.095 (-0.143, -0.047)	/	0.000108176
		MVMR-Lasso	-0.133 (-0.161, -0.106)	/	2.43858e-21
Parental lifespan	WHR	MV-IVW	-1.443 (-1.869, -1.017)	/	3.08813e-11	21
		MVMR-Median	-1.207 (-1.631, -0.782)	/	2.55381e-08
		MVMR-Egger	-0.622 (-1.268, 0.024)	/	0.0592003
		MVMR-Lasso	-1.294 (-1.594, -0.994)	/	2.94317e-17
Parental lifespan	GS	MV-IVW	-1.465 (-1.812, -1.119)	/	1.19678e-16	101
		MVMR-Median	-1.290 (-1.646, -0.933)	/	1.34189e-12
		MVMR-Egger	-1.470 (-1.817, -1.122)	/	1.15014e-16
		MVMR-Lasso	-1.350 (-1.592, -1.107)	/	1.27666e-27
Parental lifespan	ALM	MV-IVW	-1.563 (-1.932, -1.193)	/	1.11997e-16	58
		MVMR-Median	-1.383 (-1.783, -0.983)	/	1.19612e-11
		MVMR-Egger	-1.319 (-1.761, -0.877)	/	4.98536e-09
		MVMR-Lasso	-1.321 (-1.598, -1.044)	/	8.64717e-21
Parental lifespan	WBLM	MV-IVW	-1.480 (-1.847, -1.112)	/	2.95823e-15	62
		MVMR-Median	-1.411 (-1.784, -1.038)	/	1.24206e-13
		MVMR-Egger	-1.135 (-1.587, -0.684)	/	8.30938e-07
		MVMR-Lasso	-1.242 (-1.504, -0.980)	/	1.7519e-20
90th percentile longevity	BF%	MV-IVW	/	0.73 (0.64, 0.85)	1.71889e-05	83
		MVMR-Median	/	0.74 (0.62, 0.88)	0.000835688
		MVMR-Egger	/	0.71 (0.57, 0.87)	0.00138931
		MVMR-Lasso	/	0.73 (0.65, 0.83)	9.32958e-07
90th percentile longevity	BMI	MV-IVW	/	0.76 (0.65, 0.89)	0.000639862	57
		MVMR-Median	/	0.73 (0.59, 0.89)	0.00195007
		MVMR-Egger	/	0.79 (0.64, 0.96)	0.0184757
		MVMR-Lasso	/	0.76 (0.66, 0.87)	9.3781e-05
90th percentile longevity	WHR	MV-IVW	/	0.74 (0.62, 0.87)	0.000401496	21
		MVMR-Median	/	0.79 (0.64, 0.98)	0.03168
		MVMR-Egger	/	0.77 (0.59, 1.00)	0.0468222
		MVMR-Lasso	/	0.70 (0.60, 0.81)	1.39496e-06
90th percentile longevity	GS	MV-IVW	/	0.76 (0.66, 0.88)	0.000285229	99
		MVMR-Median	/	0.78 (0.66, 0.94)	0.00765641
		MVMR-Egger	/	0.76 (0.66, 0.88)	0.00025264
		MVMR-Lasso	/	0.76 (0.68, 0.86)	1.37524e-05
90th percentile longevity	ALM	MV-IVW	/	0.70 (0.61, 0.82)	2.4859e-06	58
		MVMR-Median	/	0.72 (0.59, 0.88)	0.00134789
		MVMR-Egger	/	0.70 (0.59, 0.84)	9.42414e-05
		MVMR-Lasso	/	0.73 (0.63, 0.83)	3.01574e-06
90th percentile longevity	WBLM	MV-IVW	/	0.71 (0.62, 0.82)	4.01774e-06	62
		MVMR-Median	/	0.72 (0.60, 0.87)	0.000690943
		MVMR-Egger	/	0.69 (0.58, 0.82)	4.75613e-05
		MVMR-Lasso	/	0.72 (0.63, 0.82)	5.86078e-07
99th percentile longevity	BF%	MV-IVW	/	0.68 (0.56, 0.84)	0.000274614	83
		MVMR-Median	/	0.66 (0.49, 0.88)	0.00466626
		MVMR-Egger	/	0.67 (0.49, 0.92)	0.0126185
		MVMR-Lasso	/	0.72 (0.59, 0.87)	0.0005727
99th percentile longevity	BMI	MV-IVW	/	0.72 (0.57, 0.91)	0.007014	57
		MVMR-Median	/	0.66 (0.47, 0.91)	0.0116431
		MVMR-Egger	/	0.77 (0.56, 1.05)	0.0960808
		MVMR-Lasso	/	0.68 (0.55, 0.85)	0.000826558
99th percentile longevity	WHR	MV-IVW	/	0.64 (0.50, 0.83)	0.00056083	21
		MVMR-Median	/	0.65 (0.46, 0.92)	0.0141357
		MVMR-Egger	/	0.80 (0.54, 1.17)	0.251146
		MVMR-Lasso	/	0.55 (0.43, 0.70)	1.59097e-06
99th percentile longevity	GS	MV-IVW	/	0.68 (0.56, 0.84)	0.000219681	102
		MVMR-Median	/	0.62 (0.46, 0.82)	0.000832361
		MVMR-Egger	/	0.68 (0.56, 0.84)	0.000226798
		MVMR-Lasso	/	0.65 (0.54, 0.79)	1.01587e-05
99th percentile longevity	ALM	MV-IVW	/	0.69 (0.55, 0.86)	0.00116863	58
		MVMR-Median	/	0.71 (0.52, 0.98)	0.0383396
		MVMR-Egger	/	0.65 (0.49, 0.85)	0.00170138
		MVMR-Lasso	/	0.73 (0.59, 0.90)	0.00389332
99th percentile longevity	WBLM	MV-IVW	/	0.67 (0.54, 0.84)	0.000445191	62
		MVMR-Median	/	0.63 (0.46, 0.86)	0.00383231
		MVMR-Egger	/	0.65 (0.49, 0.86)	0.00233246
		MVMR-Lasso	/	0.68 (0.56, 0.84)	0.000297015
Abbreviations: ALM, appendicular lean mass; BF%, body fat percentage; BMI, body mass index; CHD, coronary heart disease; CI, confidence interval; CKD, chronic kidney disease; GDM, gestational diabetes mellitus; GS, grip strength; MARD, mild age-related diabetes; MOD, mild obesity-related diabetes; MV-IVW, multivariable inverse-variance weighted; MVMR, multivariable Mendelian randomization; NAFLD,…

[truncated: 11 more sheets: ST10, ST11, ST12, ST13, ST14, ST15, ST16, ST17, ST18, ST19, ST20]
